# Supplementary material for: A highly efficient Ti-catalyst for the deoxygenative reduction of esters under ambient conditions: experimental and mechanistic insights from DFT studies
Source: Royal Society of Chemistry journal article supplement (doi:10.1039/d2dt00076h), 2022-01-01
Supplement: d2dt00076h1.pdf [file d2dt00076h1.pdf]

*Electronic Supporting Information for*

**Highly efficient Ti-catalyst for deoxygenative reduction of esters at ambient conditions:  
experimental and mechanistic insights from DFT Study**

Jayeeta Bhattacharjee,<sup>[a]†</sup> Parveen Rawal,<sup>[b]†</sup> Suman Das,<sup>[a]</sup> Adimulam Harinath,<sup>[a]</sup> Puneet Gupta,<sup>\*[b]</sup> and Tarun K. Panda<sup>\*[a]</sup>

<sup>a</sup>Department of Chemistry, Indian Institute of Technology Hyderabad, Kandi – 502285, Sangareddy, Telangana, India.

<sup>b</sup>Computational Catalysis Center, Department of Chemistry, Indian Institute of Technology Roorkee, Roorkee – 247667, India.

**TABLE OF CONTENTS**

|                                                                                                                                                        |     |
|--------------------------------------------------------------------------------------------------------------------------------------------------------|-----|
| (S1) X-Ray crystallographic analyses:.....                                                                                                             | 1   |
| (S2) NMR spectra for metal complexes:.....                                                                                                             | 3   |
| (S3) Experimental details of ester hydroboration:.....                                                                                                 | 8   |
| (S4) Characterization of ester hydroboration products:.....                                                                                            | 8   |
| (S5) NMR spectra of ester hydroboration products:.....                                                                                                 | 12  |
| (S6) Control Experiments:.....                                                                                                                         | 45  |
| (S7) Kinetic analysis details:.....                                                                                                                    | 51  |
| (S8) Computational Method:.....                                                                                                                        | 61  |
| (S9) Discussion on D→→I Conversion: Key Conformational Changes in Ti–O <sub>a</sub> CH(CH <sub>3</sub> )O <sub>b</sub> CH <sub>3</sub> Fragment :..... | 61  |
| (S10) Discussion on J→→O Conversion: Key Changes in Acetaldehyde Orientation Around the Ti Center :.....                                               | 63  |
| (S11) Energy Table for Figure 3:.....                                                                                                                  | 65  |
| (S12) Energy Table for Figure S85:.....                                                                                                                | 66  |
| (S13) Energy Table for Figure S86:.....                                                                                                                | 66  |
| (S14) Cartesian Coordinates of the Optimized Structures.....                                                                                           | 67  |
| (S15) References:.....                                                                                                                                 | 109 |

## (S1) X-Ray crystallographic analyses:

Single crystals of complexes **1** were grown from a concentrated solution of toluene in an argon-filled atmosphere at -35 °C. A crystal of suitable dimensions of complexes **1** was mounted on a CryoLoop (Hampton Research Corp.) with a layer of light mineral oil and placed in a nitrogen stream at 100 K. All measurements were made on a Rigaku Supernova X-calibur Eos CCD detector with graphite monochromatic Cu-K $\alpha$  (1.54184 Å) radiation. Crystal data and structure refinement parameters of complexes **1** are summarized in Table TS1. The structures were solved by direct methods (SIR2004)<sup>[1]</sup> and refined on  $F^2$  by full-matrix least-squares methods, using SHELXL-97.<sup>[2]</sup> Non-hydrogen atoms were anisotropically refined. H-atoms were included in the refinement on calculated positions riding on their carrier atoms. The function minimized was  $[\sum w(F_o^2 - F_c^2)^2]$  ( $w = 1 / [\sigma^2(F_o^2) + (aP)^2 + bP]$ ), where  $P = (\text{Max}(F_o^2, 0) + 2F_c^2) / 3$  with  $\sigma^2(F_o^2)$  from counting statistics. The function  $R1$  and  $wR2$  were  $(\sum ||F_o| - |F_c||) / \sum |F_o|$  and  $[\sum w(F_o^2 - F_c^2)^2 / \sum (wF_o^4)]^{1/2}$ , respectively. A special position disordered toluene molecule was found in the asymmetric unit. The attempts to model the toluene molecule were not successful as it was disordered over more than one position and the refinements were unstable in SHELXL. Contributions to scattering due to this toluene molecule were removed using the solvent mask instruction implemented in Olex2 crystal structure analysis software and squeeze data has been appended at CIF file. The unit cell contains a total of four toluene molecules, each has an area of 175 Å<sup>3</sup> and the corresponding electron count was 50. The ORTEP-3 program was used to draw the molecules of **1**. Crystallographic data (excluding structure factors) for the structures reported in this paper have been deposited with the Cambridge Crystallographic Data Centre as supplementary publication no. CCDC 2022197 (**1**). Copies of the data can be obtained free of charge on application to CCDC, 12 Union Road, Cambridge CB21EZ, UK (fax: + (44)1223-336-033; email: [deposit@ccdc.cam.ac.uk](mailto:deposit@ccdc.cam.ac.uk)).

**Table S1.** Crystallography table of metal complexes **1**.

|                                              |                                                                                                 |
|----------------------------------------------|-------------------------------------------------------------------------------------------------|
| Crystal Parameters                           | <b>1</b>                                                                                        |
| CCDC No.                                     | 2022197                                                                                         |
| Empirical formula                            | C <sub>30</sub> H <sub>30</sub> B <sub>2</sub> Cl <sub>2</sub> N <sub>2</sub> P <sub>2</sub> Ti |
| Formula weight                               | 620.92                                                                                          |
| <i>T</i> (K)                                 | 100 K                                                                                           |
| $\lambda$ (Å)                                | 1.54184                                                                                         |
| Crystal system                               | Monoclinic                                                                                      |
| Space group                                  | I2/a                                                                                            |
| <i>a</i> (Å)                                 | 18.7202(9)                                                                                      |
| <i>b</i> (Å)                                 | 10.1285(3)                                                                                      |
| <i>c</i> (Å)                                 | 35.068(4)                                                                                       |
| $\alpha$ (°)                                 | 90.00                                                                                           |
| $\beta$ (°)                                  | 90.837(8)                                                                                       |
| $\gamma$ (°)                                 | 90.00                                                                                           |
| <i>V</i> (Å <sup>3</sup> )                   | 6648.4(8)                                                                                       |
| <i>Z</i>                                     | 8                                                                                               |
| <i>D</i> <sub>calc</sub> g cm <sup>-3</sup>  | 1.241                                                                                           |
| $\mu$ (mm <sup>-1</sup> )                    | 4.727                                                                                           |
| <i>F</i> (000)                               | 2560.0                                                                                          |
| Theta range for data collection              | 9.088 to 141.698 deg                                                                            |
| Limiting indices                             | -17 ≤ <i>h</i> ≤ 22,<br>-12 ≤ <i>k</i> ≤ 6<br>-42 ≤ <i>l</i> ≤ 42                               |
| Reflections collected / unique               | 13610 / 6284 [R(int) = 0.0284]                                                                  |
| Completeness to theta                        | 99.8 %                                                                                          |
| Absorption correction                        | Multi-scan                                                                                      |
| Max. and min. transmission                   | 1.000 and 0.980                                                                                 |
| Refinement method                            | Full-matrix least-squares on <i>F</i> <sup>2</sup>                                              |
| Data / restraints / parameters               | 6284/0/354                                                                                      |
| Goodness-of-fit on <i>F</i> <sup>2</sup>     | 1.035                                                                                           |
| Final R indices [ <i>I</i> > 2σ( <i>I</i> )] | R1 = 0.0372<br>wR2 = 0.1012                                                                     |

**(S2) NMR spectra for metal complexes:**

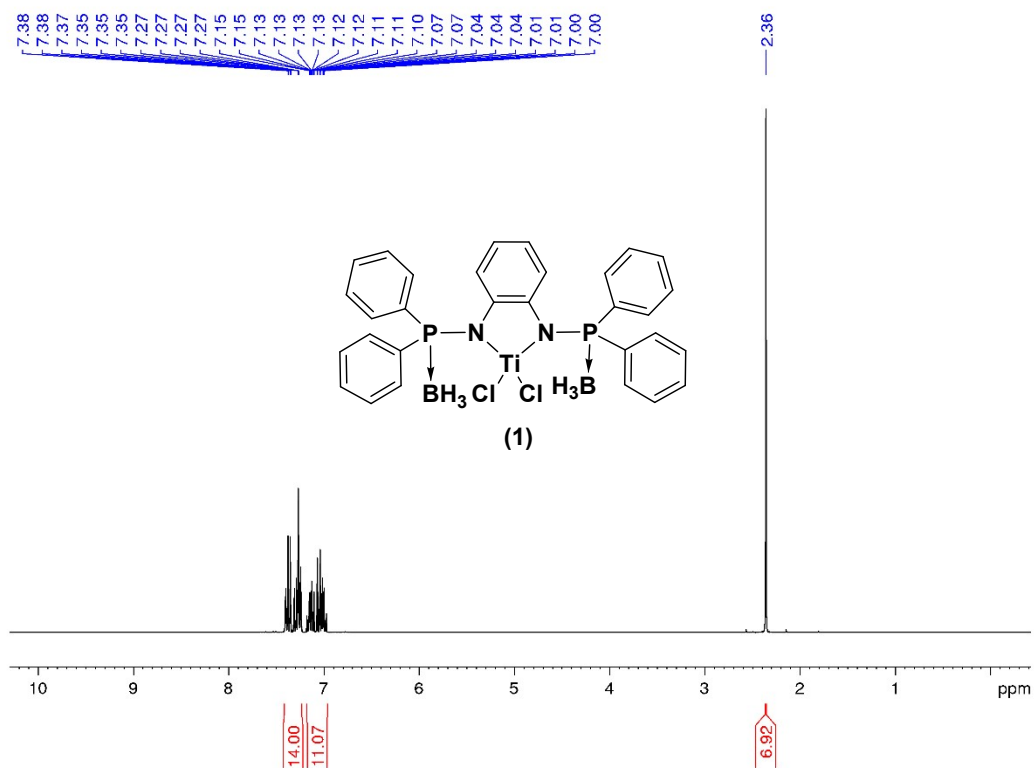

**Figure S1.** <sup>1</sup>H NMR spectrum (400 MHz, 25°C, C<sub>6</sub>D<sub>6</sub>) of compound 1.

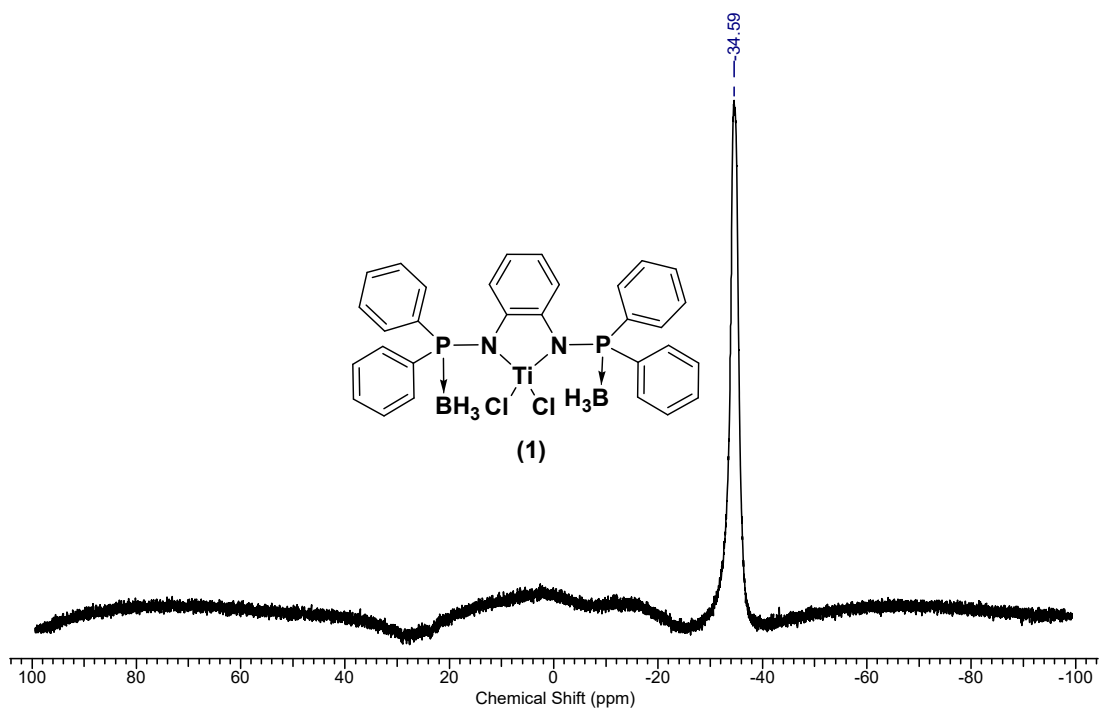

**Figure S2.**  $^{11}\text{B}\{^1\text{H}\}$  NMR spectrum (128.4 MHz, 25°C,  $\text{C}_6\text{D}_6$ ) of compound **1**.

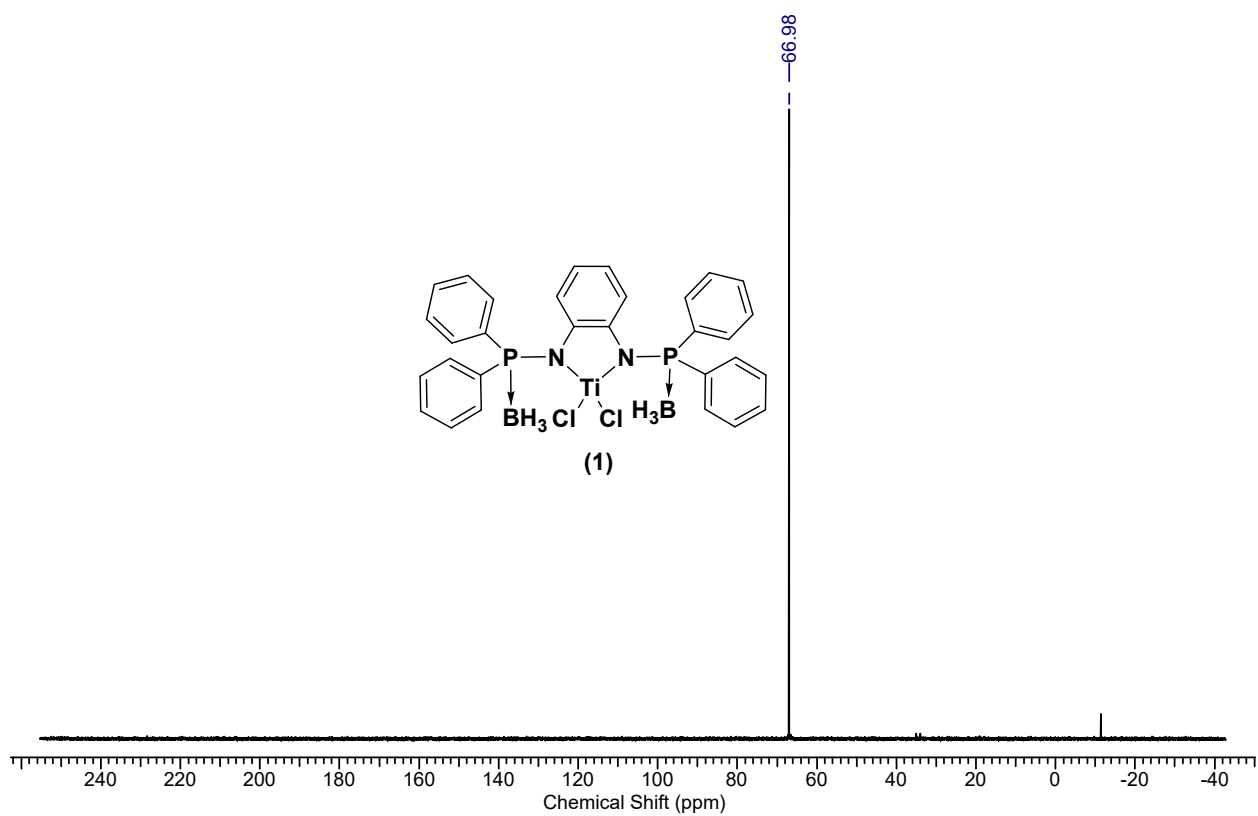

**Figure S3.**  $^{31}\text{P}\{^1\text{H}\}$  NMR spectrum (161.9 MHz, 25°C,  $\text{C}_6\text{D}_6$ ) of compound **1**.

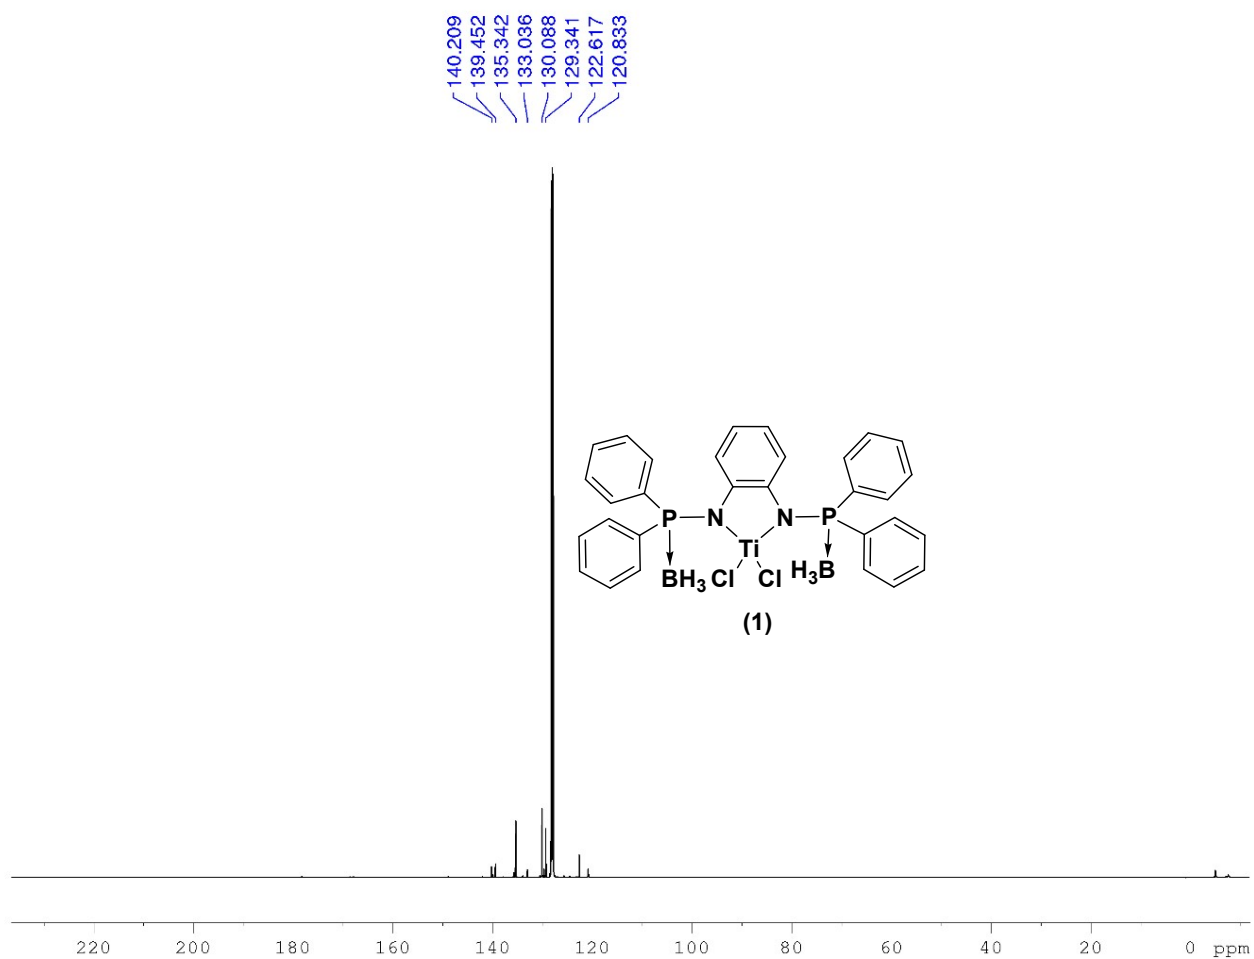

**Figure S4.**  $^{13}\text{C}\{^1\text{H}\}$  NMR spectrum (100 MHz,  $25^\circ\text{C}$ ,  $\text{C}_6\text{D}_6$ ) of compound **1**.

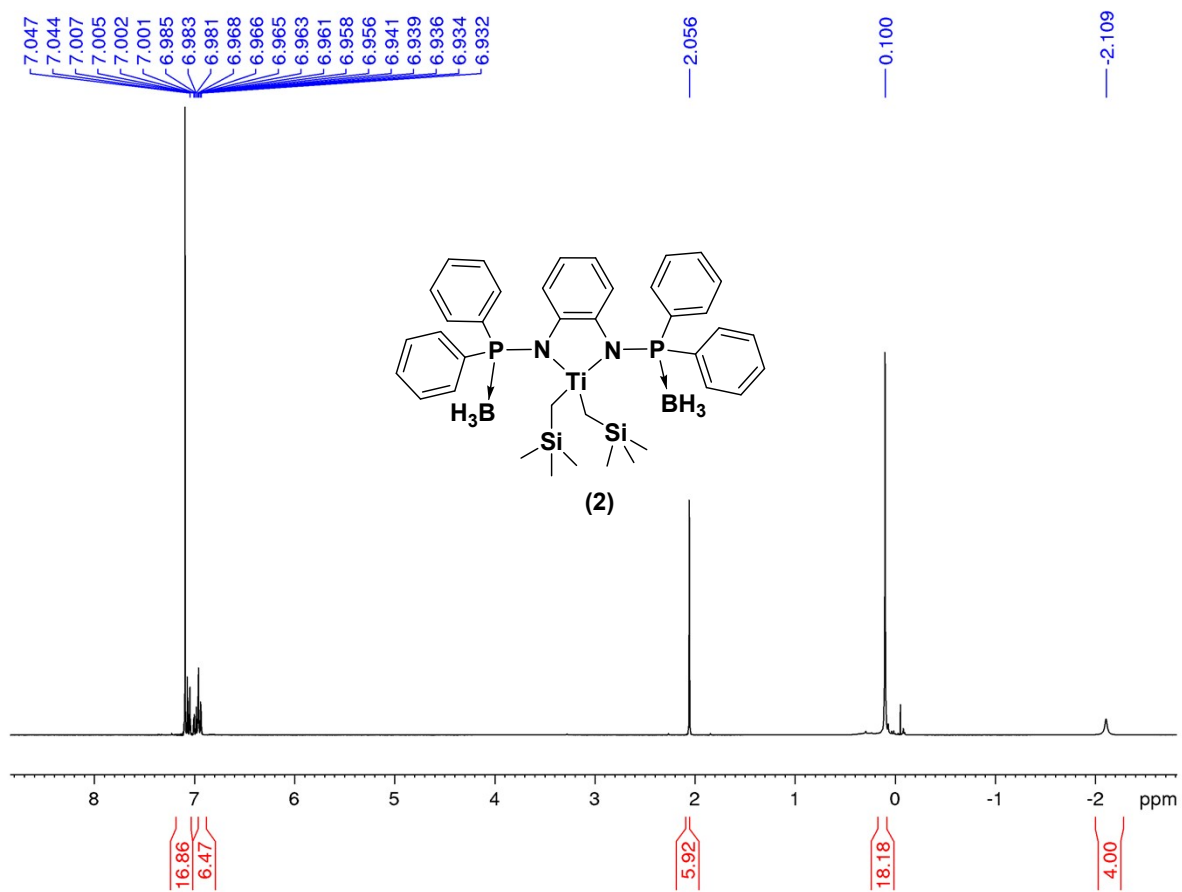

Figure S5: <sup>1</sup>H NMR spectrum (400 MHz, 25°C, C<sub>6</sub>D<sub>6</sub>) of compound **2**.

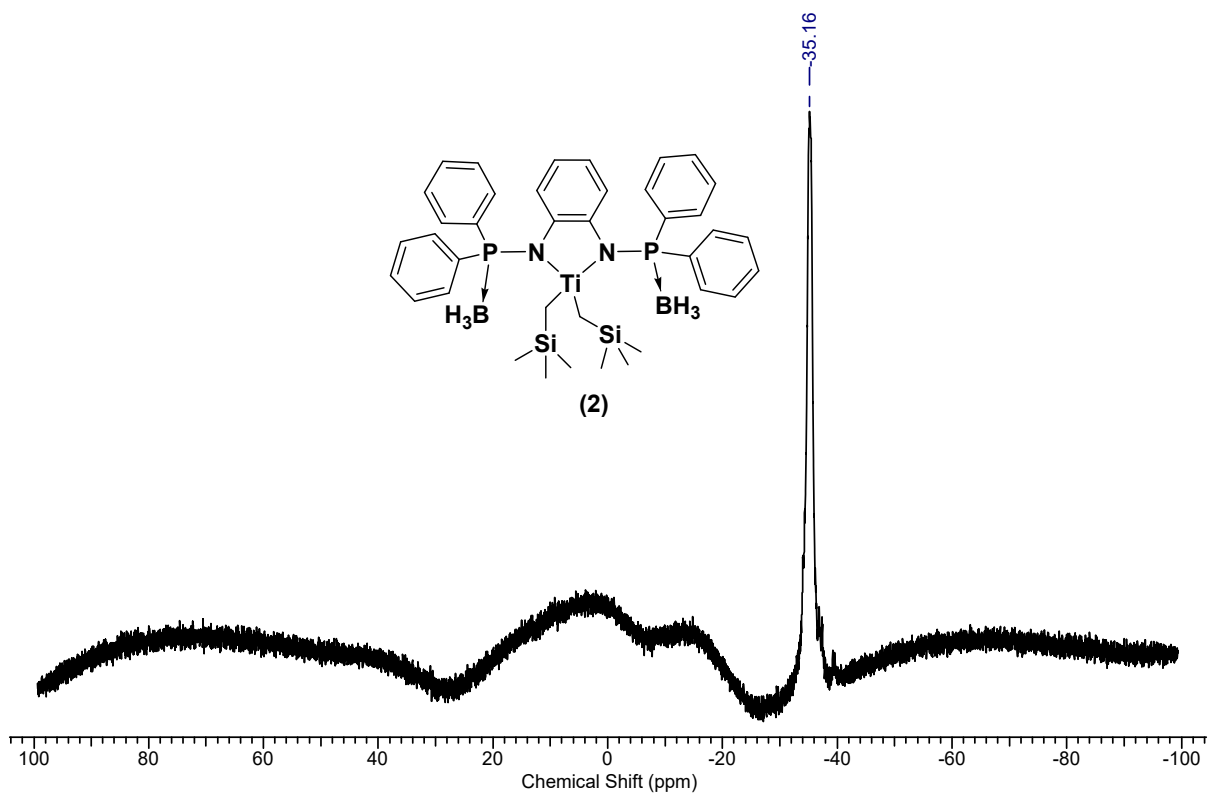

**Figure S6:** <sup>11</sup>B{<sup>1</sup>H} NMR spectrum (128.4 MHz, 25°C, C<sub>6</sub>D<sub>6</sub>) of compound **2**.

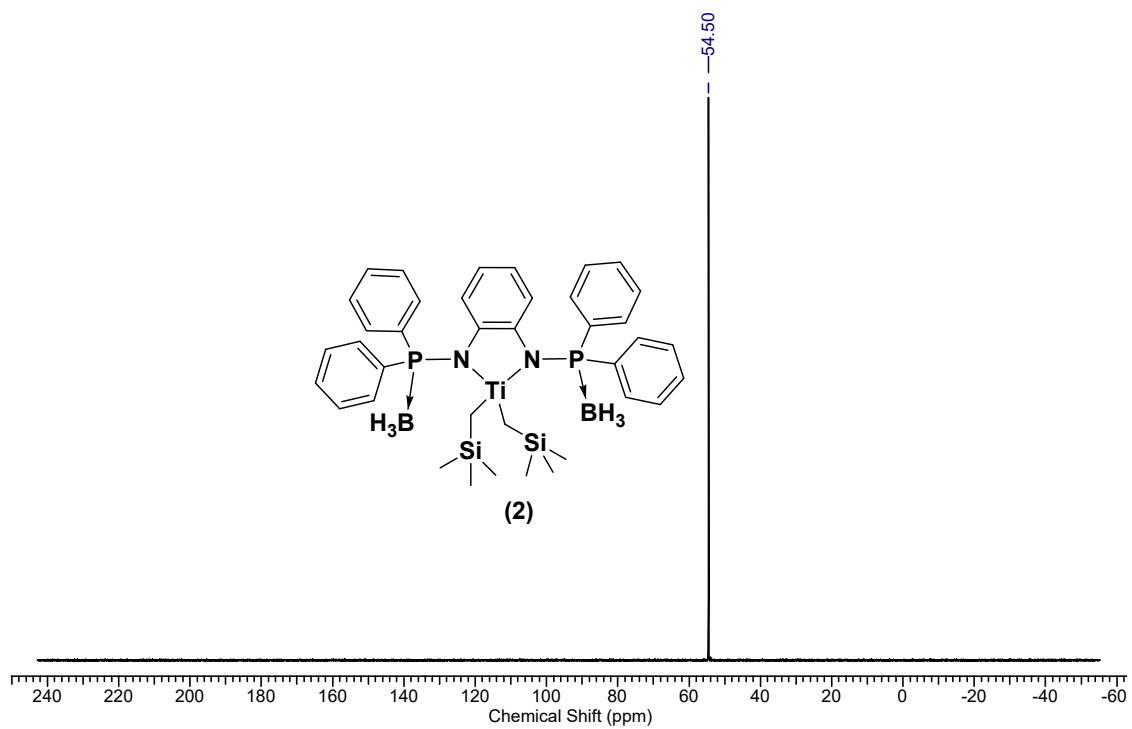

**Figure S7:** <sup>31</sup>P{<sup>1</sup>H} NMR spectrum (161.9 MHz, 25°C, C<sub>6</sub>D<sub>6</sub>) of compound **2**.



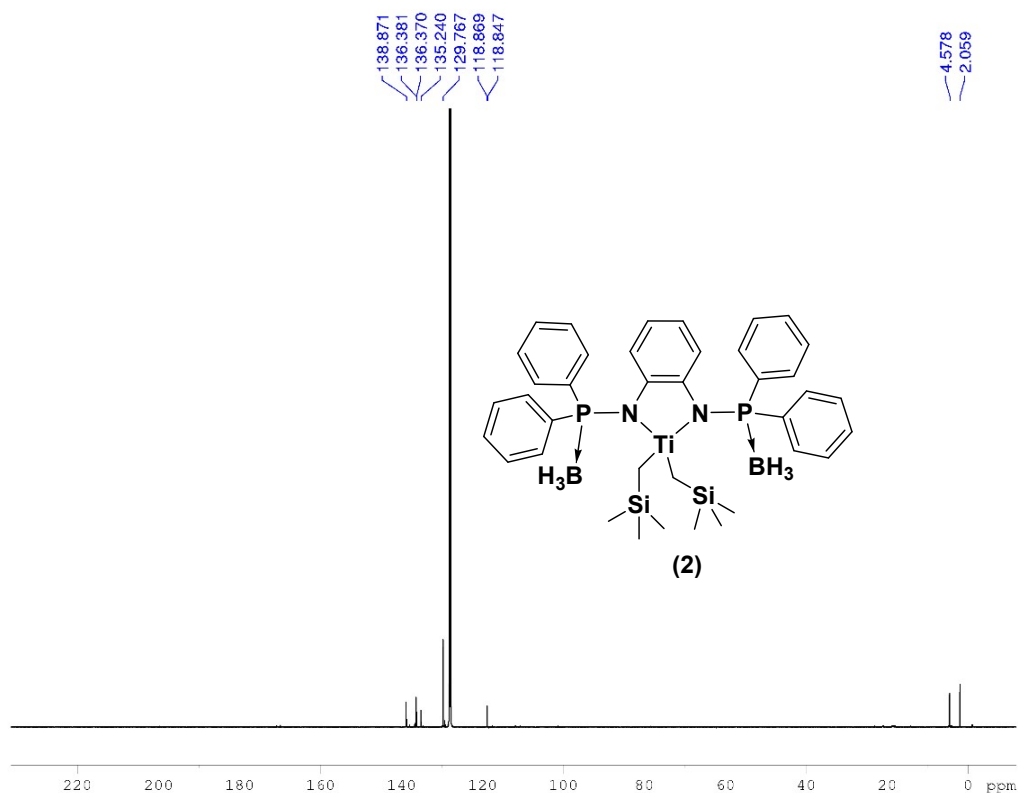

**Figure S8.** <sup>13</sup>C{<sup>1</sup>H} NMR spectrum (100 MHz, 25°C, C<sub>6</sub>D<sub>6</sub>) of compound **2**.

### (S3) Experimental details of ester hydroboration:

#### General procedure for the hydroboration of esters

An oven-dried Schlenk flask was charged with 2 mol% catalyst **2** (7.25 mg, 0.01 mmol), required ester precursor (0.50 mmol, 1 equiv) and HBpin (1.0 mmol, 2.0 equiv). The reaction mixture was then placed at room temperature. In the case of solid esters, both the substrate were dissolved in benzene-*d*<sub>6</sub> (making total volume 1.0 mL). The progress of the reaction was monitored by <sup>11</sup>B and <sup>1</sup>H NMR where the product peaks were integrated with respect to the reactant peaks standardized with the –CH<sub>3</sub>- the peak of the internal standard, HMB (8.0 mg, 0.05 mmol) which was normalized to 1.8. After the reaction was completed, the reaction mixture was evaporated under reduced pressure to obtain the desired compounds. Then the residue was washed with *n*-hexane (2 × 1 mL) to obtain **3a–3v**. Yields were calculated as an isolated yield basis.

### (S4) Characterization of ester hydroboration products:

Characterization data for the products of ester reduction are given below. Previously reported products were characterized by <sup>1</sup>H, <sup>11</sup>B{<sup>1</sup>H} and <sup>13</sup>C{<sup>1</sup>H} NMR.

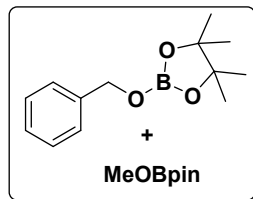

Yield (**3a**) (99%).  $^1\text{H}$  NMR (400 MHz,  $\text{C}_6\text{D}_6$ ):  $\delta_{\text{H}}$  7.99–7.96 (d,  $J = 9.1$  Hz, 1H, ArH), 7.20–7.18 (m, 1H, ArH), 7.04–6.93 (m, 3H, ArH), 4.83 (s, 2H,  $\text{CH}_2$ ), 0.94 (s, 12H, OBpin);  $^{13}\text{C}\{^1\text{H}\}$  NMR (100 MHz,  $\text{C}_6\text{D}_6$ ):  $\delta_{\text{C}}$  140.7, 133.5, 130.5, 127.7, 83.4, 67.6, 25.4 ppm;  $^{11}\text{B}\{^1\text{H}\}$  NMR (128 MHz,  $\text{C}_6\text{D}_6$ ):  $\delta_{\text{B}}$  22.9 ppm, (**3b**):  $^1\text{H}$  NMR (400 MHz,  $\text{C}_6\text{D}_6$ ):  $\delta_{\text{H}}$  3.38 (s, 3H, BpinOCH<sub>3</sub>), 0.92 (s, 12H, OBpin);  $^{13}\text{C}\{^1\text{H}\}$  (100 MHz,  $\text{C}_6\text{D}_6$ ): 83.2, 53.1, 25.4;  $^{11}\text{B}\{^1\text{H}\}$  NMR (128 MHz,  $\text{C}_6\text{D}_6$ ):  $\delta_{\text{B}}$  22.9 ppm. NMR data are in accordance with the literature.<sup>[3]</sup>

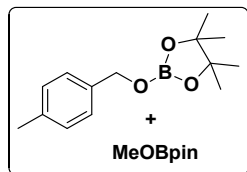

Yield (**3c**) (97%).  $^1\text{H}$  NMR (400 MHz,  $\text{C}_6\text{D}_6$ ):  $\delta_{\text{H}}$  7.24 (d,  $J = 11.2$  Hz, 2H, ArH), 6.73 (d,  $J = 11.2$  Hz, 2H, ArH), 4.91 (s, 2H,  $\text{CH}_2$ ), 2.10 (s, 3H, ArCH<sub>3</sub>), 1.04 (s, 12H, OBpin);  $^{13}\text{C}\{^1\text{H}\}$  NMR (100 MHz,  $\text{C}_6\text{D}_6$ ):  $\delta_{\text{C}}$  137.8, 137.6, 129.9, 127.9, 83.8, 67.6, 25.6, 21.8 ppm;  $^{11}\text{B}\{^1\text{H}\}$  NMR (128 MHz,  $\text{C}_6\text{D}_6$ ):  $\delta_{\text{B}}$  22.9 ppm, (**3b**):  $^1\text{H}$  NMR (400 MHz,  $\text{C}_6\text{D}_6$ ):  $\delta_{\text{H}}$  3.28 (s, 3H, BpinOCH<sub>3</sub>), 1.02 (s, 12H, OBpin);  $^{13}\text{C}\{^1\text{H}\}$  (100 MHz,  $\text{C}_6\text{D}_6$ ): 83.2, 53.1, 25.4 ppm;  $^{11}\text{B}\{^1\text{H}\}$  NMR (128 MHz,  $\text{C}_6\text{D}_6$ ):  $\delta_{\text{B}}$  22.9 ppm. NMR data are in accordance with the literature.<sup>[3]</sup>

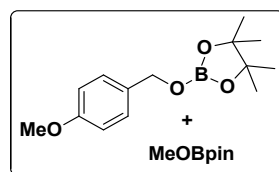

Yield (**3d**) (97%).  $^1\text{H}$  NMR (400 MHz,  $\text{C}_6\text{D}_6$ ):  $\delta_{\text{H}}$  7.25 (d,  $J = 11.2$  Hz, 2H, ArH), 6.74 (d,  $J = 11.2$  Hz, 2H, ArH), 4.90 (s, 2H,  $\text{CH}_2$ ), 3.31 (s, 3H, OCH<sub>3</sub>), 1.05 (s, 12H, OBpin);  $^{13}\text{C}\{^1\text{H}\}$  NMR (100 MHz,  $\text{C}_6\text{D}_6$ ):  $\delta_{\text{C}}$  160.3, 132.6, 129.5, 114.6, 83.3, 67.4, 55.5, 25.7 ppm;  $^{11}\text{B}\{^1\text{H}\}$  NMR (128 MHz,  $\text{C}_6\text{D}_6$ ):  $\delta_{\text{B}}$  22.9 ppm, (**3b**):  $^1\text{H}$  NMR (400 MHz,  $\text{C}_6\text{D}_6$ ):  $\delta_{\text{H}}$  3.31 (s, 3H, BpinOCH<sub>3</sub>), 1.04 (s, 12H, OBpin);  $^{13}\text{C}\{^1\text{H}\}$  (100 MHz,  $\text{C}_6\text{D}_6$ ): 83.2, 55.4, 25.4;  $^{11}\text{B}\{^1\text{H}\}$  NMR (128 MHz,  $\text{C}_6\text{D}_6$ ):  $\delta_{\text{B}}$  22.9 ppm. NMR data are in accordance with the literature.<sup>[3]</sup>

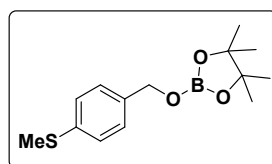

Yield (**3e**) (96%).  $^1\text{H}$  NMR (400 MHz,  $\text{CDCl}_3$ ):  $\delta_{\text{H}}$  7.14 (d,  $J = 8.4$  Hz, 2H, ArH), 7.06 (d,  $J = 8.1$  Hz, 2H, ArH), 4.08 (s, 2H,  $\text{CH}_2$ ), 2.32 (s, 3H, CH<sub>3</sub>), 1.09 (s, 12H, OBpin);  $^{13}\text{C}\{^1\text{H}\}$  NMR (100 MHz,  $\text{CDCl}_3$ ):  $\delta_{\text{C}}$  144.7, 128.9, 126.6, 123.9, 74.2, 51.1, 23.8, 13.7 ppm;  $^{11}\text{B}\{^1\text{H}\}$  NMR (128 MHz,  $\text{CDCl}_3$ ):  $\delta_{\text{B}}$  22.7 ppm.

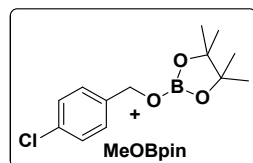

Yield (**3f**) (98%).  $^1\text{H}$  NMR (400 MHz,  $\text{C}_6\text{D}_6$ ):  $\delta_{\text{H}}$  6.91–6.87 (m, 1H, ArH), 6.73–6.68 (m, 2H, ArH), 6.81–6.76 (m, 1H, ArH), 4.63 (s, 2H,  $\text{CH}_2$ ), 0.93 (s, 12H, OBpin);  $^{13}\text{C}\{^1\text{H}\}$  NMR (100 MHz,  $\text{C}_6\text{D}_6$ ):  $\delta_{\text{C}}$  143.4, 135.8, 131.2, 126.2, 84.2, 67.3, 25.9 ppm;  $^{11}\text{B}\{^1\text{H}\}$  NMR (128 MHz,  $\text{C}_6\text{D}_6$ ):  $\delta_{\text{B}}$  22.97 ppm, (**3b**):  $^1\text{H}$  NMR (400 MHz,  $\text{C}_6\text{D}_6$ ):  $\delta_{\text{H}}$  3.39 (s, 3H, BpinOCH<sub>3</sub>), 0.92 (s, 12H, OBpin);  $^{13}\text{C}\{^1\text{H}\}$  (100 MHz,  $\text{C}_6\text{D}_6$ ): 83.2, 55.4, 25.3;  $^{11}\text{B}\{^1\text{H}\}$  NMR (128 MHz,  $\text{C}_6\text{D}_6$ ):  $\delta_{\text{B}}$  22.9 ppm. NMR data are in accordance with the literature.<sup>[3]</sup>

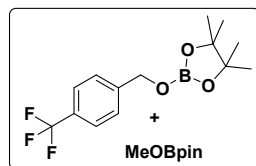

Yield (**3g**) (98%).  $^1\text{H}$  NMR (400 MHz,  $\text{C}_6\text{D}_6$ ):  $\delta_{\text{H}}$  7.31–7.28 (m, 2H, ArH), 7.09–7.07 (m, 2H, ArH), 4.78 (s, 2H,  $\text{CH}_2$ ), 1.04 (s, 12H, OBpin);  $^{13}\text{C}\{^1\text{H}\}$  NMR (100 MHz,  $\text{C}_6\text{D}_6$ ):  $\delta_{\text{C}}$  144.5, 132.4, 127.5, 126.1, 83.6, 66.7, 25.4 ppm;  $^{11}\text{B}\{^1\text{H}\}$  NMR (128 MHz,  $\text{CDCl}_3$ ):  $\delta_{\text{B}}$  22.9 ppm;  $^{19}\text{F}\{^1\text{H}\}$  NMR (376.46 MHz,  $\text{C}_6\text{D}_6$ ):  $\delta_{\text{F}}$  -62.3 ppm, (**3b**):  $^1\text{H}$  NMR (400 MHz,  $\text{C}_6\text{D}_6$ ):  $\delta_{\text{H}}$  3.51 (s, 3H, BpinOCH<sub>3</sub>), 1.00 (s, 12H, OBpin);  $^{13}\text{C}\{^1\text{H}\}$  (100 MHz,  $\text{C}_6\text{D}_6$ ): 83.2, 53.1, 25.3;  $^{11}\text{B}\{^1\text{H}\}$  NMR (128 MHz,  $\text{C}_6\text{D}_6$ ):  $\delta_{\text{B}}$  22.9 ppm. NMR data are in accordance with the literature.<sup>[3]</sup>

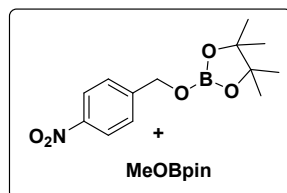

Yield (**3h**) (97%).  $^1\text{H}$  NMR (400 MHz,  $\text{C}_6\text{D}_6$ ):  $\delta_{\text{H}}$  7.79 (d,  $J = 11.6$  Hz, 2H, ArH), 6.90 (d,  $J = 11.6$  Hz, 2H, ArH), 4.69 (s, 2H,  $\text{CH}_2$ ), 1.04 (s, 12H, OBpin);  $^{13}\text{C}\{^1\text{H}\}$  NMR (100 MHz,  $\text{C}_6\text{D}_6$ ):  $\delta_{\text{C}}$  148.2, 147.2, 127.4, 124.2, 83.7, 66.3, 25.4 ppm;  $^{11}\text{B}\{^1\text{H}\}$  NMR (128 MHz,  $\text{C}_6\text{D}_6$ ):  $\delta_{\text{B}}$  22.9 ppm, (**3b**):  $^1\text{H}$  NMR (400 MHz,  $\text{C}_6\text{D}_6$ ):  $\delta_{\text{H}}$  3.51 (s, 3H, BpinOCH<sub>3</sub>);  $^{13}\text{C}\{^1\text{H}\}$  (100 MHz,  $\text{C}_6\text{D}_6$ ): 83.2, 53.1, 25.3;  $^{11}\text{B}\{^1\text{H}\}$  NMR (128 MHz,  $\text{C}_6\text{D}_6$ ):  $\delta_{\text{B}}$  22.9

ppm. The methyl peaks of -OBpin in  $^1\text{H}$  NMR are overlapping in the region 1.04–1.02 ppm. NMR data are in accordance with the literature.<sup>[3]</sup>

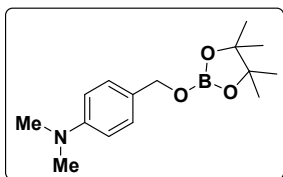

Yield (**3i**) (92%).  $^1\text{H}$  NMR (400 MHz,  $\text{CDCl}_3$ ):  $\delta_{\text{H}}$  7.29–7.27 (m, 1H, ArH), 7.11–7.08 (m, 1H, ArH), 6.52–6.47 (m, 2H, ArH), 4.01 (s, 2H,  $\text{CH}_2$ ), 2.85–2.75 (s, 6H,  $\text{N}(\text{CH}_3)_2$ ), 1.13–1.08 (s, 12H, OBpin);  $^{13}\text{C}\{^1\text{H}\}$  NMR (100 MHz,  $\text{CDCl}_3$ ):  $\delta_{\text{C}}$  131.7, 131.1, 110.5, 82.9, 82.6, 81.8, 80.1, 39.8, 24.6, 22.5 ppm;  $^{11}\text{B}\{^1\text{H}\}$  NMR (128 MHz,  $\text{CDCl}_3$ ):  $\delta_{\text{B}}$  21.18 ppm. NMR data are in accordance with the literature.<sup>[3]</sup>

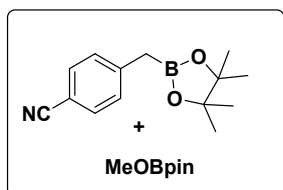

Yield (**3j**) (97%).  $^1\text{H}$  NMR (400 MHz,  $\text{CDCl}_3$ ):  $\delta_{\text{H}}$  7.00 (d,  $J = 8.4$  Hz, 2H, ArH), 6.90 (d,  $J = 8.4$  Hz, 2H, ArH), 4.67 (s, 2H,  $\text{CH}_2$ ), 1.04 (s, 24H, OBpin);  $^{13}\text{C}\{^1\text{H}\}$  NMR (100 MHz,  $\text{CDCl}_3$ ):  $\delta_{\text{C}}$  145.5, 133.1, 128.0, 127.7, 84.1, 66.8, 25.9 ppm;  $^{11}\text{B}\{^1\text{H}\}$  NMR (128 MHz,  $\text{CDCl}_3$ ):  $\delta_{\text{B}}$  22.20 ppm, (**3b**):  $^1\text{H}$  NMR (400 MHz,  $\text{C}_6\text{D}_6$ ):  $\delta_{\text{H}}$  3.50 (s, 3H, BpinOCH<sub>3</sub>), 1.02 (s, 12H, OBpin);  $^{13}\text{C}\{^1\text{H}\}$  (100 MHz,  $\text{C}_6\text{D}_6$ ): 83.5, 53.4, 25.6;  $^{11}\text{B}\{^1\text{H}\}$  NMR (128 MHz,  $\text{C}_6\text{D}_6$ ):  $\delta_{\text{B}}$  22.9 ppm. NMR data are in accordance with the

literature.<sup>[3]</sup>

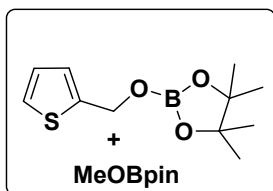

Yield (**3k**) (96%).  $^1\text{H}$  NMR (400 MHz,  $\text{C}_6\text{D}_6$ ):  $\delta_{\text{H}}$  6.87–6.82 (m, 2H, ArH), 6.66–6.65 (m, 1H, ArH), 4.99 (s, 2H,  $\text{CH}_2$ ), 1.04 (s, 12H, OBpin);  $^{13}\text{C}\{^1\text{H}\}$  NMR (100 MHz,  $\text{C}_6\text{D}_6$ ):  $\delta_{\text{C}}$  143.4, 127.4, 126.7, 126.3, 83.5, 62.5, 25.6 ppm;  $^{11}\text{B}\{^1\text{H}\}$  NMR (128 MHz,  $\text{C}_6\text{D}_6$ ):  $\delta_{\text{B}}$  22.95 ppm, (**3b**):  $^1\text{H}$  NMR (400 MHz,  $\text{C}_6\text{D}_6$ ):  $\delta_{\text{H}}$  3.49 (s, 3H, BpinOCH<sub>3</sub>), 1.02 (s, 12H, OBpin);  $^{13}\text{C}\{^1\text{H}\}$  (100 MHz,  $\text{C}_6\text{D}_6$ ): 83.2, 53.0, 25.4;  $^{11}\text{B}\{^1\text{H}\}$  NMR (128 MHz,  $\text{C}_6\text{D}_6$ ):  $\delta_{\text{B}}$  22.9 ppm. NMR data are in accordance with the literature.<sup>[3]</sup>

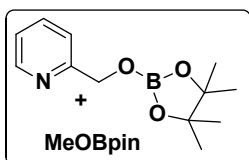

Yield (**3l**) (95%).  $^1\text{H}$  NMR (400 MHz,  $\text{CDCl}_3$ ):  $\delta_{\text{H}}$  8.67–8.45 (m, 2H, ArH), 7.33–7.31 (m, 1H, ArH), 6.71–6.70 (m, 1H, ArH), 4.72 (s, 2H,  $\text{CH}_2$ ), 1.08–1.05 (s, 12H, OBpin);  $^{13}\text{C}\{^1\text{H}\}$  NMR (100 MHz,  $\text{CDCl}_3$ ):  $\delta_{\text{C}}$  150.0, 135.6, 134.9, 132.4, 123.9, 83.6, 65.3, 25.8;  $^{11}\text{B}\{^1\text{H}\}$  NMR (128 MHz,  $\text{CDCl}_3$ ):  $\delta_{\text{B}}$  21.8 ppm, (**3b**):  $^1\text{H}$  NMR (400 MHz,  $\text{C}_6\text{D}_6$ ):  $\delta_{\text{H}}$  3.20 (s, 3H, BpinOCH<sub>3</sub>), 1.02 (s, 12H, OBpin);  $^{13}\text{C}\{^1\text{H}\}$  (100 MHz,  $\text{C}_6\text{D}_6$ ): 83.2, 53.0, 25.4;  $^{11}\text{B}\{^1\text{H}\}$  NMR (128 MHz,  $\text{C}_6\text{D}_6$ ):  $\delta_{\text{B}}$  22.9 ppm. NMR data are in accordance with the literature.<sup>[3]</sup>

53.0, 25.4;  $^{11}\text{B}\{^1\text{H}\}$  NMR (128 MHz,  $\text{C}_6\text{D}_6$ ):  $\delta_{\text{B}}$  22.9 ppm. NMR data are in accordance with the literature.<sup>[3]</sup>

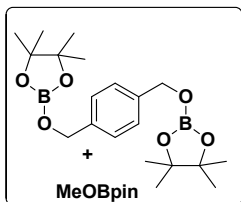

Yield (**3m**) (94%).  $^1\text{H}$  NMR (400 MHz,  $\text{CDCl}_3$ ):  $\delta_{\text{H}}$  7.24 (s, 4H, ArH), 4.90 (s, 4H,  $\text{CH}_2$ ), 1.04 (s, 24H, OBpin);  $^{13}\text{C}\{^1\text{H}\}$  NMR (100 MHz,  $\text{CDCl}_3$ ):  $\delta_{\text{C}}$  138.8, 126.8, 82.4, 66.4, 24.5 ppm;  $^{11}\text{B}\{^1\text{H}\}$  NMR (128 MHz,  $\text{CDCl}_3$ ):  $\delta_{\text{B}}$  22.49 ppm, (**3b**):  $^1\text{H}$  NMR (400 MHz,  $\text{C}_6\text{D}_6$ ):  $\delta_{\text{H}}$  3.49 (s, 3H, BpinOCH<sub>3</sub>), 1.01 (s, 12H, OBpin);  $^{13}\text{C}\{^1\text{H}\}$  (100 MHz,  $\text{C}_6\text{D}_6$ ): 82.2, 52.0, 24.4;  $^{11}\text{B}\{^1\text{H}\}$  NMR (128 MHz,  $\text{C}_6\text{D}_6$ ):  $\delta_{\text{B}}$  22.9 ppm. NMR data are in accordance with the literature.<sup>[3]</sup>

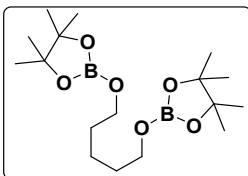

Yield (**3n**) (97%).  $^1\text{H}$  NMR (400 MHz,  $\text{CDCl}_3$ ):  $\delta_{\text{H}}$  3.54–3.50 (m, 4H,  $\text{CH}_2$ ), 1.52–1.45 (m, 2H,  $\text{CH}_2$ ), 1.38–1.35 (m, 2H,  $\text{CH}_2$ ), 1.14 (s, 24H, OBpin);  $^{13}\text{C}\{^1\text{H}\}$  NMR (100 MHz,  $\text{CDCl}_3$ ):  $\delta_{\text{C}}$  129.4, 75.0, 67.7, 62.0, 38.8, 32.0, 29.6, 25.4, 24.4 ppm;  $^{11}\text{B}\{^1\text{H}\}$  NMR (128 MHz,  $\text{CDCl}_3$ ):  $\delta_{\text{B}}$  22.09 ppm. NMR data are in accordance with the literature.<sup>[3]</sup>

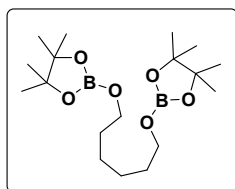

Yield (**3o**) (96%).  $^1\text{H}$  NMR (400 MHz,  $\text{C}_6\text{D}_6$ ):  $\delta_{\text{H}}$  3.90–3.85 (m, 4H,  $\text{CH}_2$ ), 1.47–1.45 (m, 3H,  $\text{CH}_2$ ), 1.25–1.20 (m, 3H,  $\text{CH}_2$ ), 1.07 (s, 24H, OBpin);  $^{13}\text{C}\{^1\text{H}\}$  NMR (100 MHz,

C<sub>6</sub>D<sub>6</sub>):  $\delta_C$  83.0, 65.6, 32.6, 26.3, 25.4 ppm;  $^{11}\text{B}\{^1\text{H}\}$  NMR (128 MHz, C<sub>6</sub>D<sub>6</sub>):  $\delta_B$  22.76 ppm. NMR data are in accordance with the literature.<sup>[3]</sup>

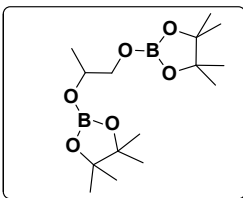

Yield (**3p**) (97%).  $^1\text{H}$  NMR (400 MHz, C<sub>6</sub>D<sub>6</sub>):  $\delta_H$  4.54–4.49 (m, 1H, CH), 3.87–3.85 (m, 2H, CH<sub>2</sub>), 1.11 (s, 24H, OBpin), 1.09–1.00 (m, 3H, CH<sub>3</sub>);  $^{13}\text{C}\{^1\text{H}\}$  NMR (100 MHz, C<sub>6</sub>D<sub>6</sub>):  $\delta_C$  83.1, 71.4, 70.2, 25.6, 21.2 ppm;  $^{11}\text{B}\{^1\text{H}\}$  NMR (128 MHz, C<sub>6</sub>D<sub>6</sub>):  $\delta_B$  22.80 ppm.

Hz, 2H, CH<sub>2</sub>), 1.73–1.52 BpinOCy) ppm;  $^{13}\text{C}$  NMR  $^{11}\text{B}\{^1\text{H}\}$  NMR (96.3 MHz, (s, 3H, BpinOCH<sub>3</sub>), 1.04  $^{11}\text{B}\{^1\text{H}\}$  NMR (128 MHz, C<sub>6</sub>D<sub>6</sub>):  $\delta_B$  22.6 ppm. NMR data are in accordance with the literature.<sup>[3]</sup>

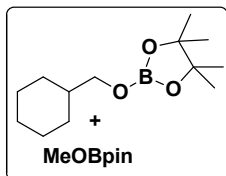

Yield (**3q**) (98%).  $^1\text{H}$  NMR (300 MHz, C<sub>6</sub>D<sub>6</sub>):  $\delta_H$  = 3.76 (d,  $J$  = 6.4 (m, 6H, BpinOCy), 1.07 (s, 12H, OC(CH<sub>3</sub>)<sub>2</sub>), 0.96–0.88 (m, 4H, (75.5 MHz, C<sub>6</sub>D<sub>6</sub>):  $\delta_C$  = 83.2, 71.3, 40.5, 30.4, 27.5, 26.8, 25.4 ppm; C<sub>6</sub>D<sub>6</sub>):  $\delta_B$  = 22.9 ppm, (**3b**):  $^1\text{H}$  NMR (400 MHz, C<sub>6</sub>D<sub>6</sub>):  $\delta_H$  3.50 (s, 12H, OBpin);  $^{13}\text{C}\{^1\text{H}\}$  (100 MHz, C<sub>6</sub>D<sub>6</sub>): 83.0, 53.0, 25.3;

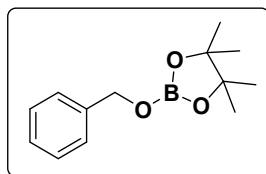

Yield (**3a**) (98%).  $^1\text{H}$  NMR (400 MHz, C<sub>6</sub>D<sub>6</sub>):  $\delta_H$  7.20–7.01 (d,  $J$  = 9.6 Hz, 2H, ArH), 6.99–6.93 (m, 3H, ArH), 4.83 (s, 2H, CH<sub>2</sub>), 0.91 (s, 12H, OBpin);  $^{13}\text{C}\{^1\text{H}\}$  NMR (100 MHz, C<sub>6</sub>D<sub>6</sub>):  $\delta_C$  140.7, 129.2, 128.2, 127.7, 83.3, 67.6, 25.3 ppm;  $^{11}\text{B}\{^1\text{H}\}$  NMR (128 MHz, C<sub>6</sub>D<sub>6</sub>):  $\delta_B$  23.1 ppm. NMR data are in accordance with the literature.<sup>[3]</sup>

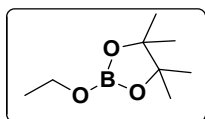

Yield (**3r**) (99%).  $^1\text{H}$  NMR (400 MHz, C<sub>6</sub>D<sub>6</sub>):  $\delta_H$  3.92 (q,  $J$  = 7.0 Hz, 2H, CH<sub>2</sub>CH<sub>3</sub>), 1.12 (t,  $J$  = 8.1 Hz, 3H, CH<sub>2</sub>CH<sub>3</sub>), 1.06 (s, 12H, OBpin).  $^{13}\text{C}\{^1\text{H}\}$  NMR (100 MHz, C<sub>6</sub>D<sub>6</sub>):  $\delta_C$  83.0, 61.4, 25.4, 18.2 ppm.  $^{11}\text{B}\{^1\text{H}\}$  NMR (128 MHz, C<sub>6</sub>D<sub>6</sub>)  $\delta_B$  22.77 ppm. NMR data are in accordance with the literature.<sup>[3]</sup>

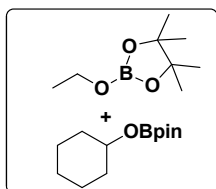

Yield (**3s**) (96%).  $^1\text{H}$  NMR (400 MHz, C<sub>6</sub>D<sub>6</sub>):  $\delta_H$  4.13 – 4.04 (m, 1H, CHC<sub>2</sub>H<sub>5</sub>), 3.78 (q, 2H, CH<sub>2</sub>CH<sub>3</sub>), 1.79 - 1.48 (m, 10H, BpinOC<sub>2</sub>H<sub>5</sub>), 1.35 (t, 3H, CH<sub>2</sub>CH<sub>3</sub>), 1.07 (s, 24H, OBpin).  $^{13}\text{C}\{^1\text{H}\}$  NMR (100 MHz, C<sub>6</sub>D<sub>6</sub>):  $\delta_C$  83.0, 82.8, 73.3, 61.3, 35.4, 26.4, 25.4, 25.3, 24.7 ppm.  $^{11}\text{B}\{^1\text{H}\}$  NMR (128 MHz, C<sub>6</sub>D<sub>6</sub>)  $\delta_B$  22.7 ppm, (**3r**):  $^1\text{H}$  NMR (400 MHz, C<sub>6</sub>D<sub>6</sub>):  $\delta_H$  3.92 (q,  $J$  = 7.0 Hz, 2H, CH<sub>2</sub>CH<sub>3</sub>), 1.12 (t,  $J$  = 8.1 Hz, 3H, CH<sub>2</sub>CH<sub>3</sub>), 1.06 (s, 12H, OBpin).  $^{13}\text{C}\{^1\text{H}\}$  NMR (100 MHz, C<sub>6</sub>D<sub>6</sub>):  $\delta_C$  83.0, 61.4, 25.4, 18.2 ppm.  $^{11}\text{B}\{^1\text{H}\}$  NMR (128 MHz, C<sub>6</sub>D<sub>6</sub>)  $\delta_B$

22.77 ppm. NMR data are in accordance with the literature.<sup>[3]</sup>

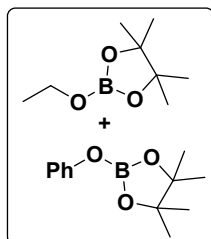

Yield (**3r**) (9%).  $^1\text{H}$  NMR (400 MHz, C<sub>6</sub>D<sub>6</sub>):  $\delta_H$  7.14 – 7.09 (m, 2H, Ar-H), 6.99 – 6.96 (m, 2H, Ar-H), 6.79 – 6.74 (m, 1H, Ar-H), 0.95 (s, 24H, OBpin).  $^{13}\text{C}\{^1\text{H}\}$  NMR (100 MHz, C<sub>6</sub>D<sub>6</sub>):  $\delta_C$  155.2, 130.4, 124.1, 120.9, 84.1, 25.5 ppm.  $^{11}\text{B}\{^1\text{H}\}$  NMR (128 MHz, C<sub>6</sub>D<sub>6</sub>)  $\delta_B$  22.9 ppm, (**3r**):  $^1\text{H}$  NMR (400 MHz, C<sub>6</sub>D<sub>6</sub>):  $\delta_H$  3.81 (q,  $J$  = 7.0 Hz, 2H, CH<sub>2</sub>CH<sub>3</sub>), 1.02 (t,  $J$  = 8.2 Hz, 3H, CH<sub>2</sub>CH<sub>3</sub>), 0.95 (s, 12H, OBpin).  $^{13}\text{C}\{^1\text{H}\}$  NMR (100 MHz, C<sub>6</sub>D<sub>6</sub>):  $\delta_C$  83.2, 61.5, 23.4 ppm.  $^{11}\text{B}\{^1\text{H}\}$  NMR (128 MHz, C<sub>6</sub>D<sub>6</sub>)  $\delta_B$  22.9 ppm. NMR data are in accordance with the literature.<sup>[3]</sup>

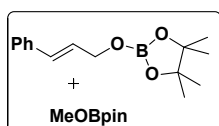

Yield (**3u**) (96%):  $^1\text{H}$  NMR (300 MHz, C<sub>6</sub>D<sub>6</sub>):  $\delta_H$  = 7.19–7.01 (m, 5H, Ar-H), 6.60 (d, 1H,  $J$  = 15.9 Hz, CH), 6.19–6.14 (m, 1H, CH), 4.53 (d, 2H,  $J$  = 4.2 Hz, CH<sub>2</sub>), 1.06 (s, 12H, OC(CH<sub>3</sub>)<sub>2</sub>) ppm;  $^{13}\text{C}$

$\{^1\text{H}\}$  NMR (75.5 MHz,  $\text{C}_6\text{D}_6$ ):  $\delta_{\text{C}} = 137.0, 131.4, 130.6, 128.5, 127.2, 126.5, 82.4, 65.2, 24.4$  ppm;  $^{11}\text{B}$   $\{^1\text{H}\}$  NMR (96.3 MHz,  $\text{C}_6\text{D}_6$ ):  $\delta_{\text{B}} = 22.9$  ppm. (**3b**):  $^1\text{H}$  NMR (400 MHz,  $\text{C}_6\text{D}_6$ ):  $\delta_{\text{H}} 3.50$  (s, 3H,  $\text{BpinOCH}_3$ ), 1.03 (s, 12H,  $\text{OBpin}$ );  $^{13}\text{C}\{^1\text{H}\}$  (100 MHz,  $\text{C}_6\text{D}_6$ ): 82.2, 52.0, 24.1;  $^{11}\text{B}\{^1\text{H}\}$  NMR (128 MHz,  $\text{C}_6\text{D}_6$ ):  $\delta_{\text{B}} 22.9$  ppm. NMR data are in accordance with the literature.<sup>[3]</sup>

### (S5) NMR spectra of ester hydroboration products:

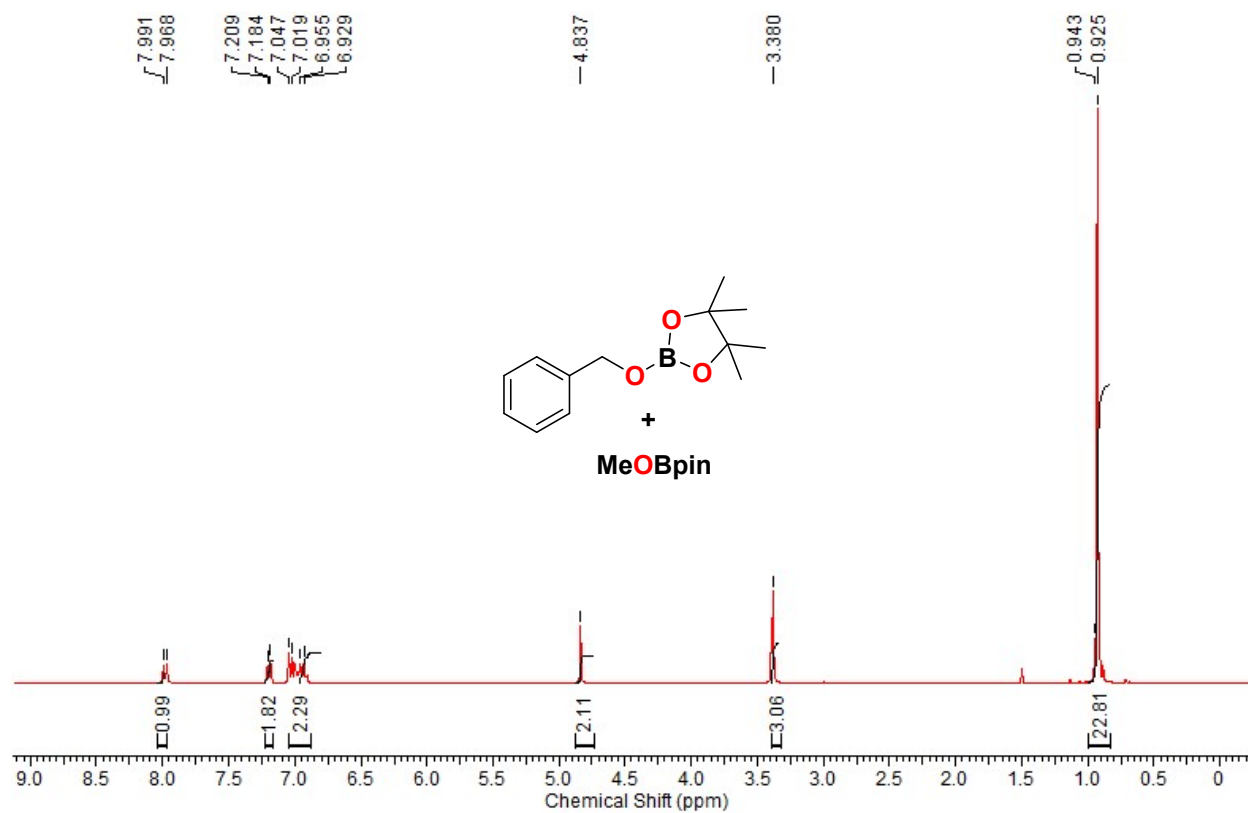

**Figure S9.**  $^1\text{H}$  NMR spectrum (400 MHz, 25°C,  $\text{C}_6\text{D}_6$ ) of compound **3a** and **3b**.

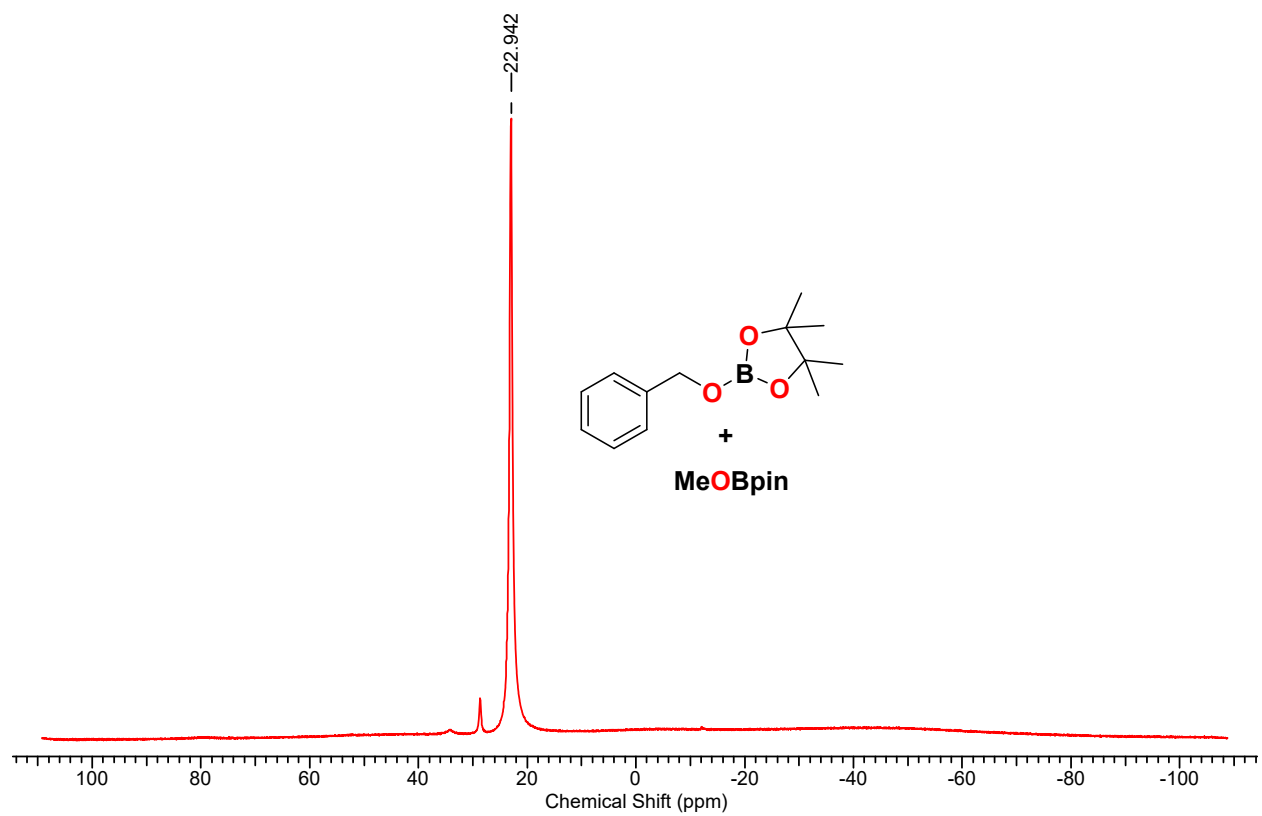

Figure S10.  $^{11}\text{B}$  NMR spectrum (128.4 MHz, 25°C,  $\text{C}_6\text{D}_6$ ) of compound **3a** and **3b**.

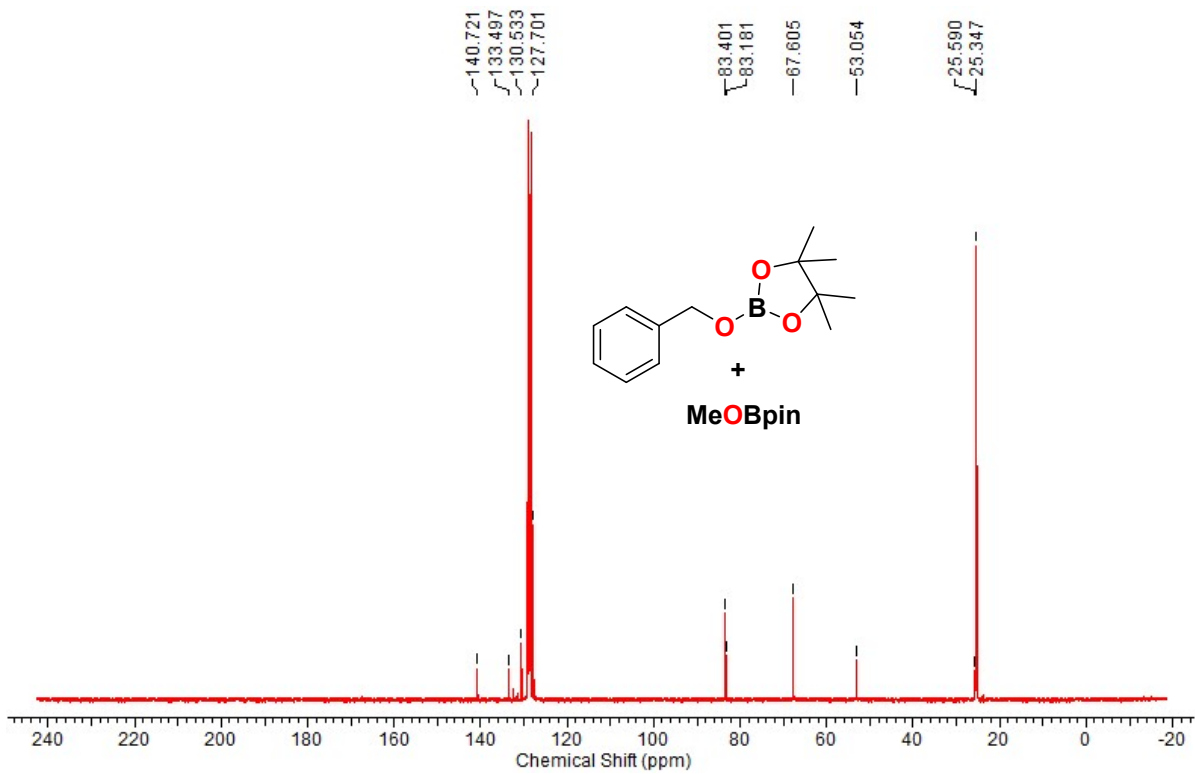

**Figure S11:**  $^{13}\text{C}$  NMR spectrum (100 MHz, 25°C,  $\text{C}_6\text{D}_6$ ) of compound **3a** and **3b**.

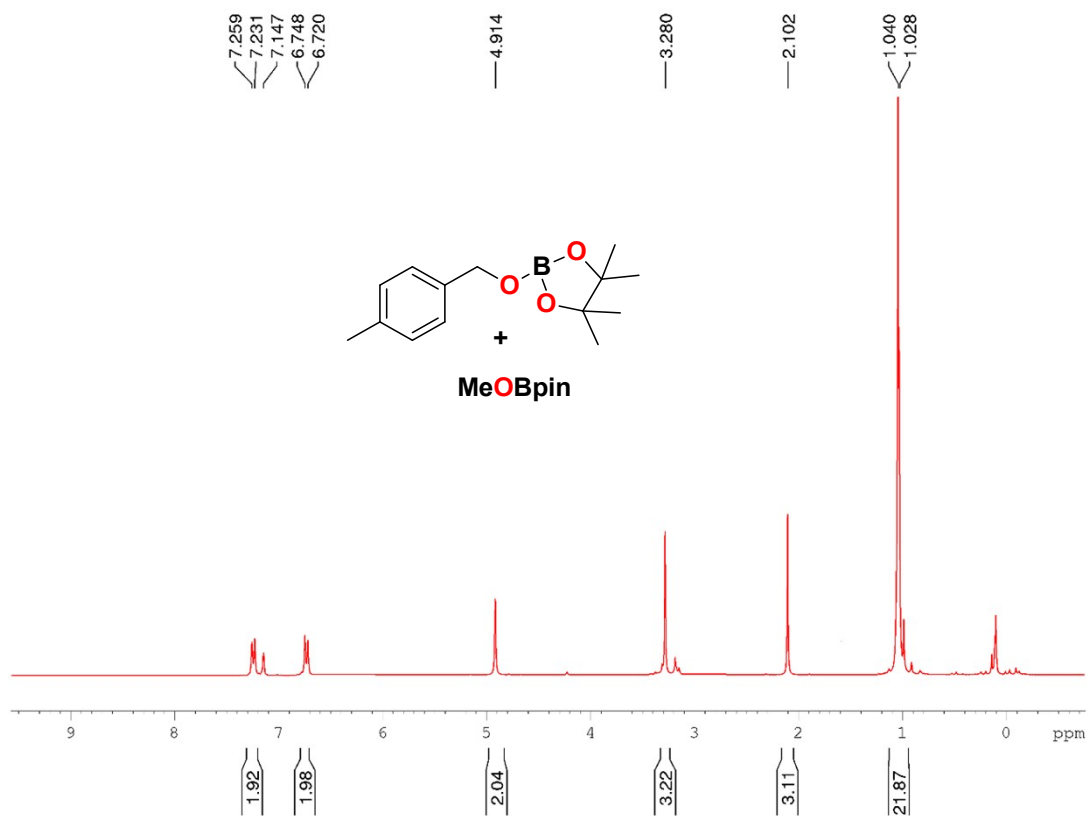

**Figure S12:**  $^1\text{H}$  NMR spectrum (400 MHz, 25°C,  $\text{C}_6\text{D}_6$ ) of compound **3c** and **3b**.

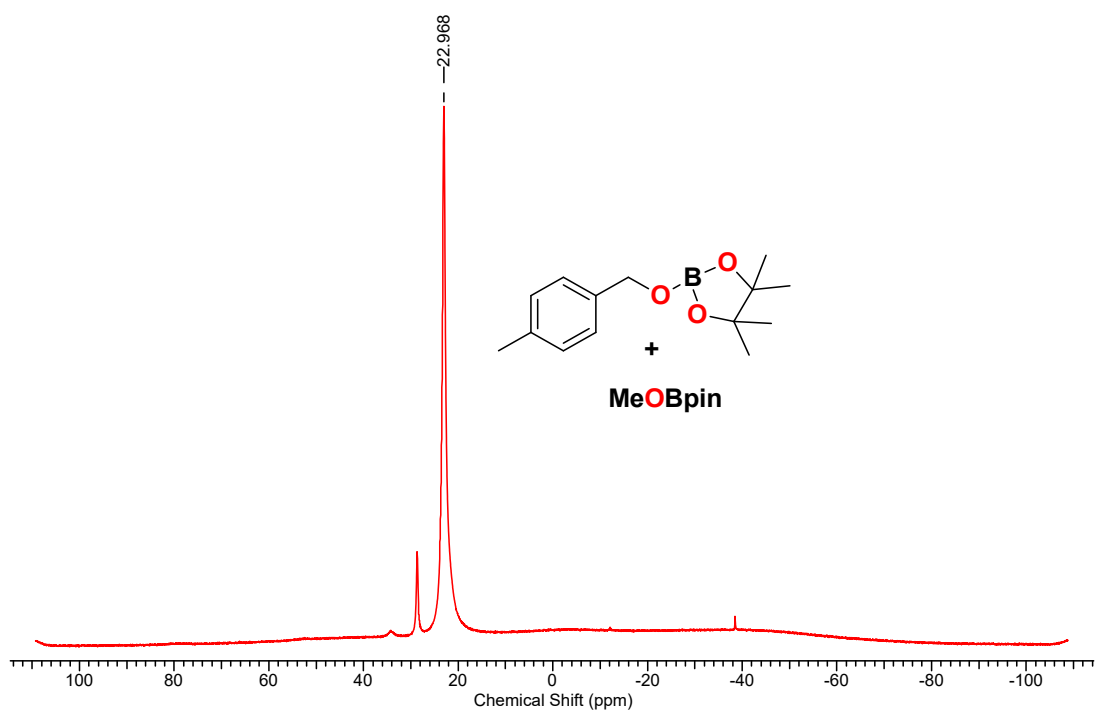

Figure S13.  $^{11}\text{B}$  NMR spectrum (128.4 MHz, 25°C,  $\text{C}_6\text{D}_6$ ) of compound **3c** and **3b**.

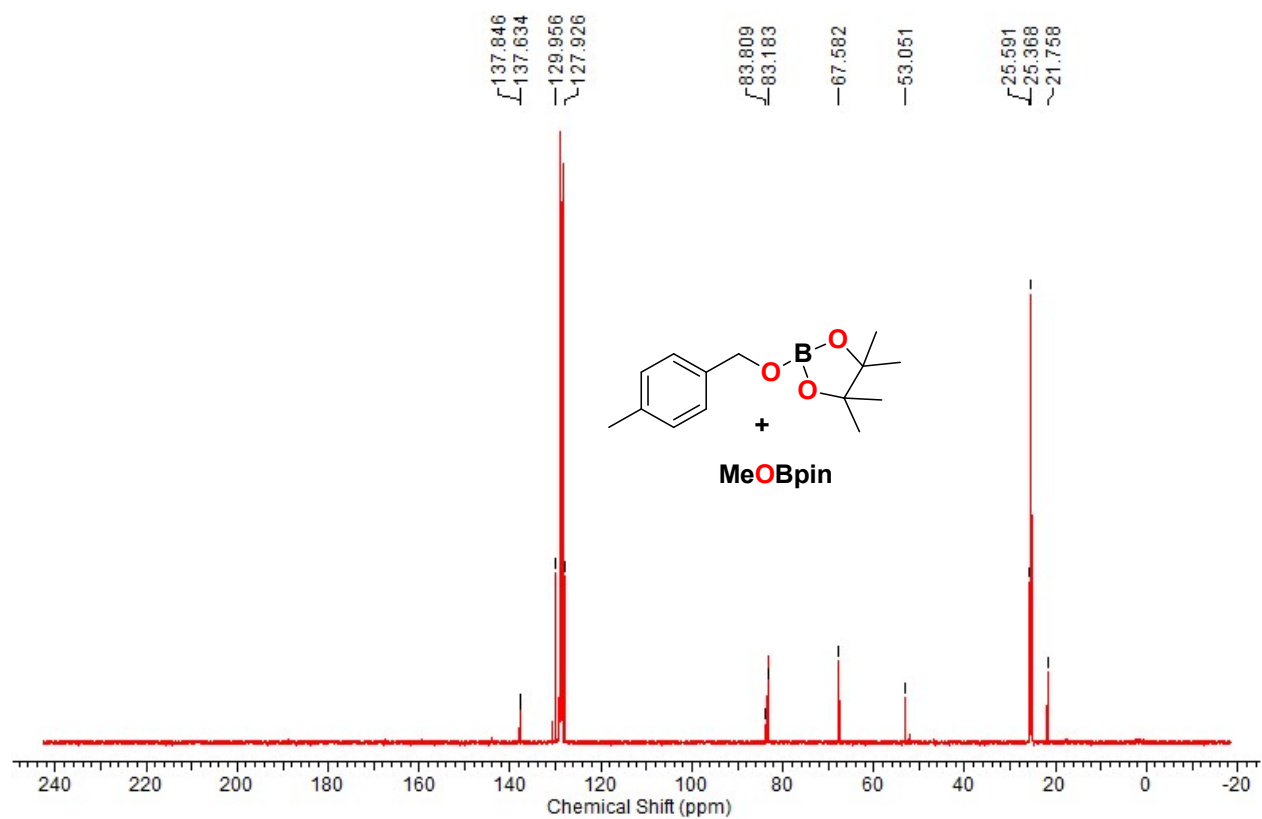

Figure S14.  $^{13}\text{C}$  NMR spectrum (100 MHz, 25°C,  $\text{C}_6\text{D}_6$ ) of compound **3c** and **3b**.

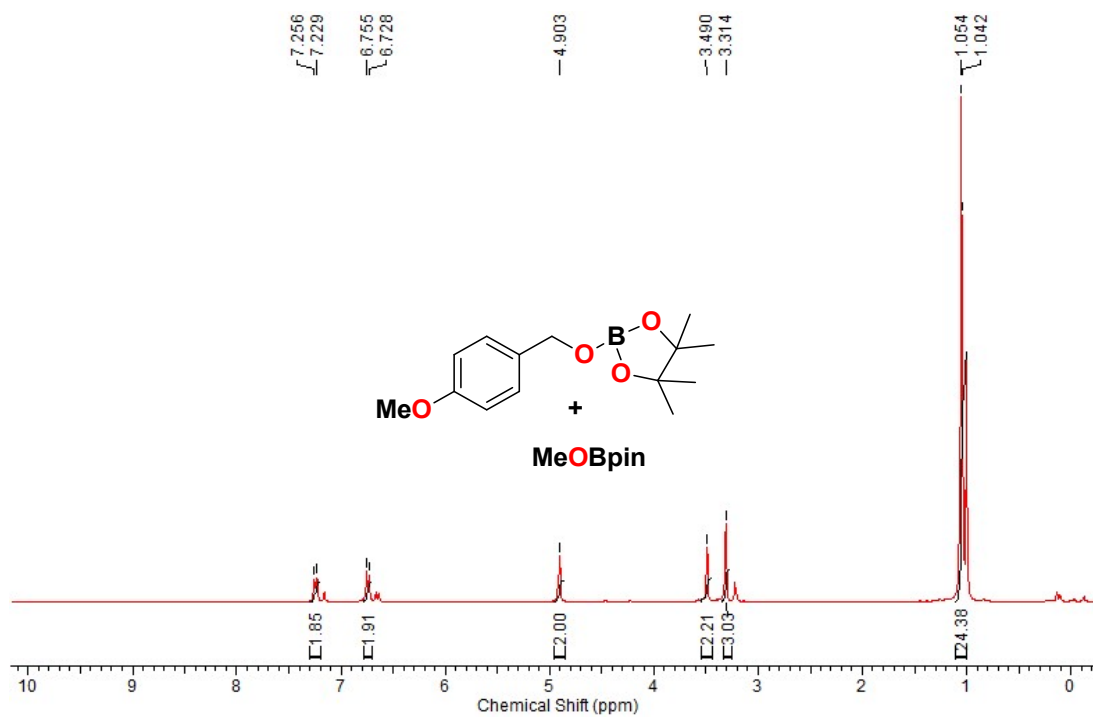



Figure S15.  $^1\text{H}$  NMR spectrum (400 MHz, 25°C,  $\text{C}_6\text{D}_6$ ) of compound **3d** and **3b**.

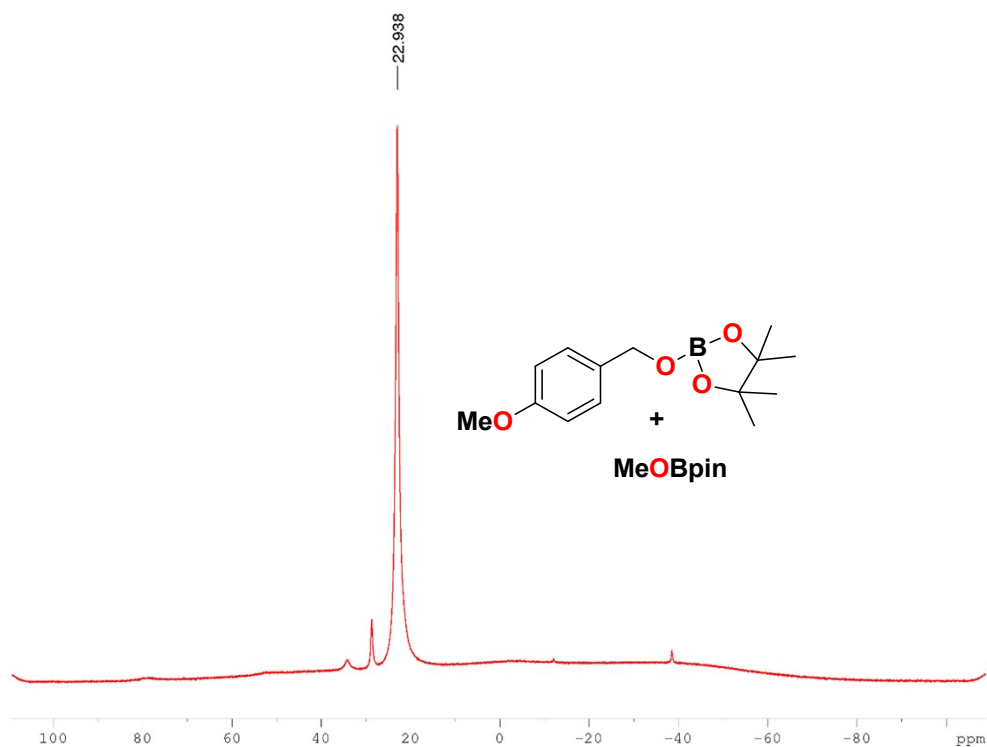

Figure S16.  $^{13}\text{B}$  NMR spectrum (128.4 MHz, 25°C,  $\text{C}_6\text{D}_6$ ) of compound **3d** and **3b**.

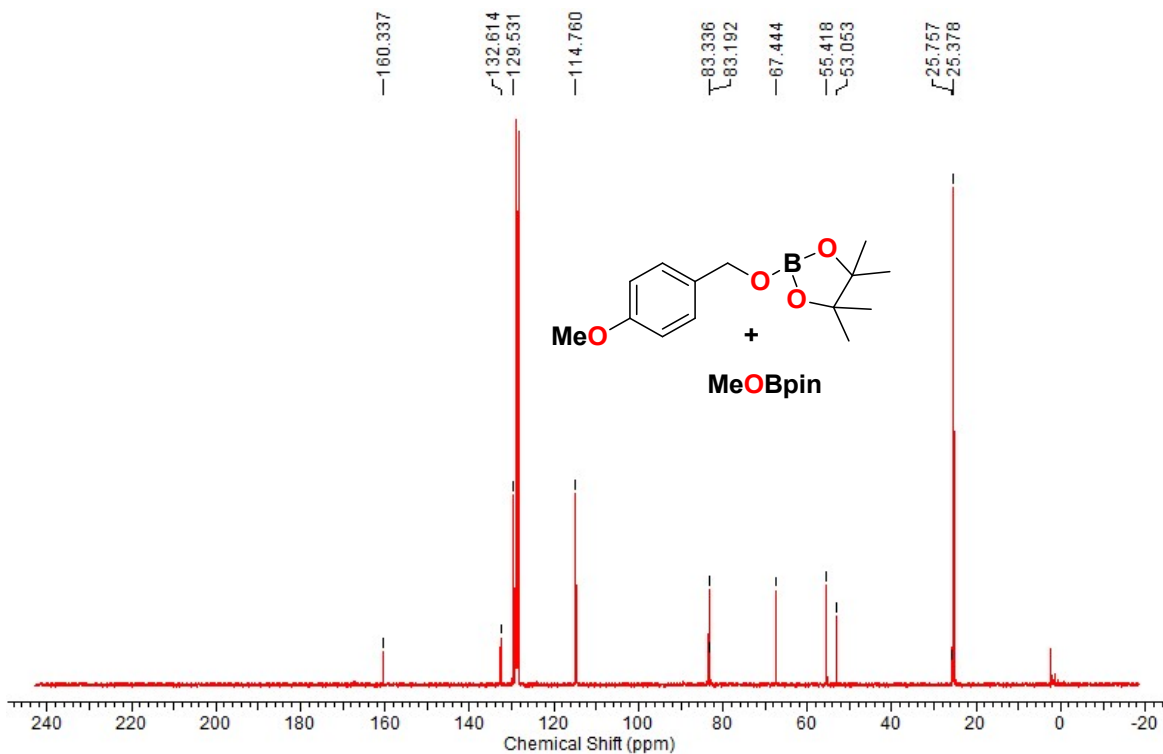

**Figure S17.**  $^{13}\text{C}$  NMR spectrum (100 MHz, 25°C,  $\text{C}_6\text{D}_6$ ) of compound **3d** and **3b**.

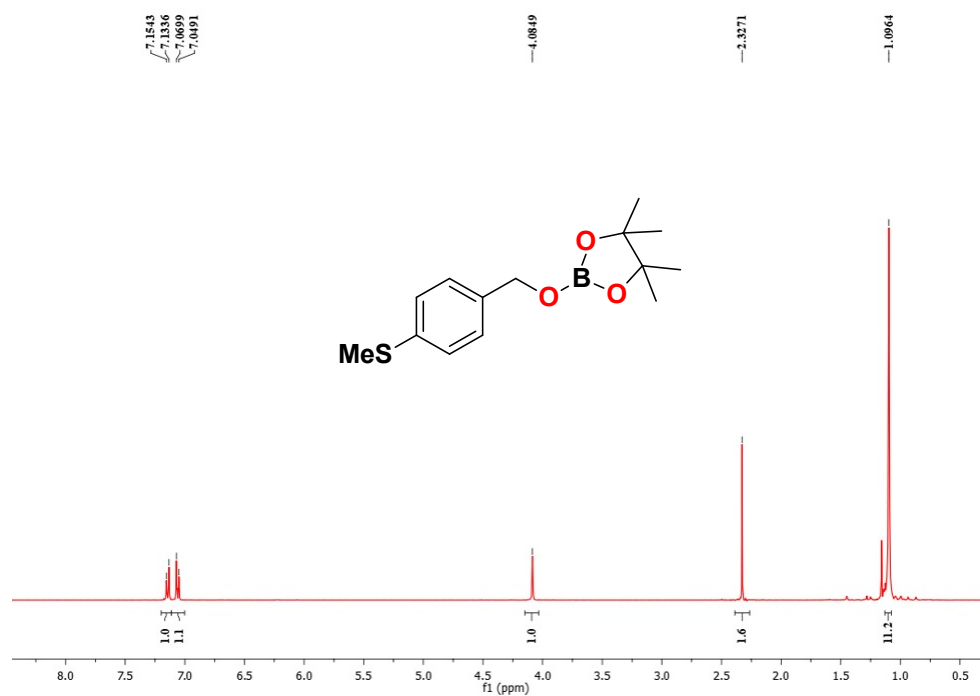

**Figure S18.**  $^1\text{H}$  NMR spectrum (400 MHz, 25°C,  $\text{CDCl}_3$ ) of compound **3e**.

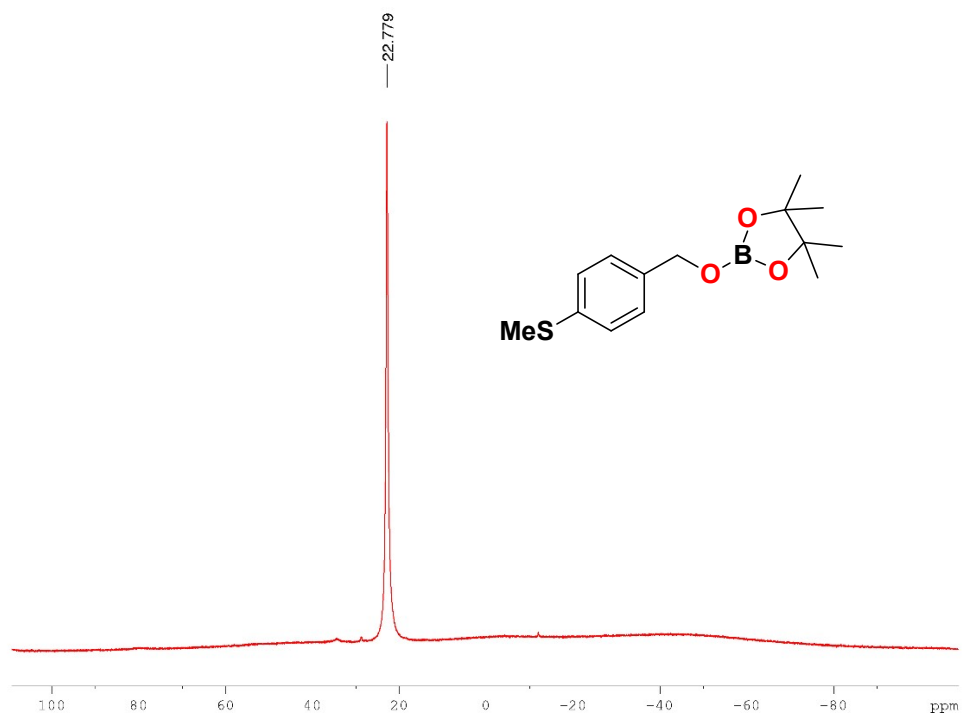

Figure S19.  $^{11}\text{B}$  NMR spectrum (128.4 MHz, 25°C,  $\text{CDCl}_3$ ) of **3e**.

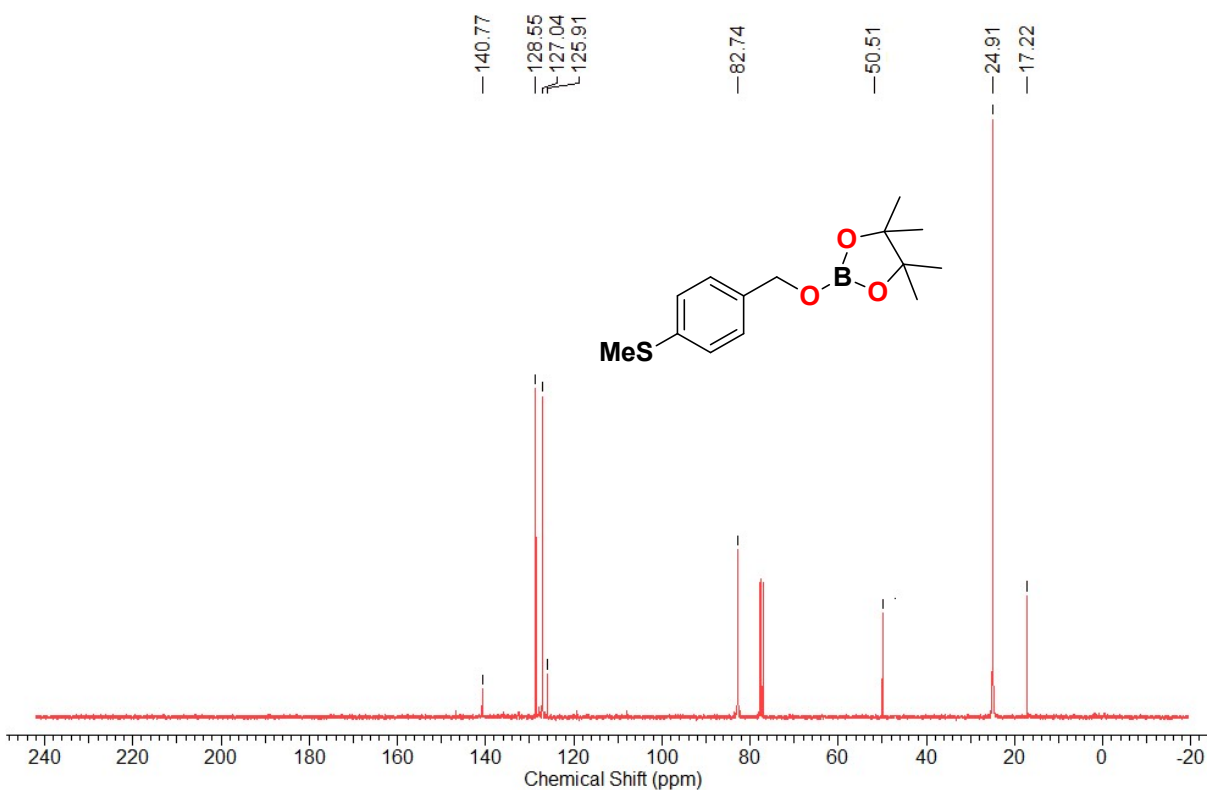

Figure S20.  $^{13}\text{C}$  NMR spectrum (400 MHz, 25°C,  $\text{CDCl}_3$ ) of compound **3e**.

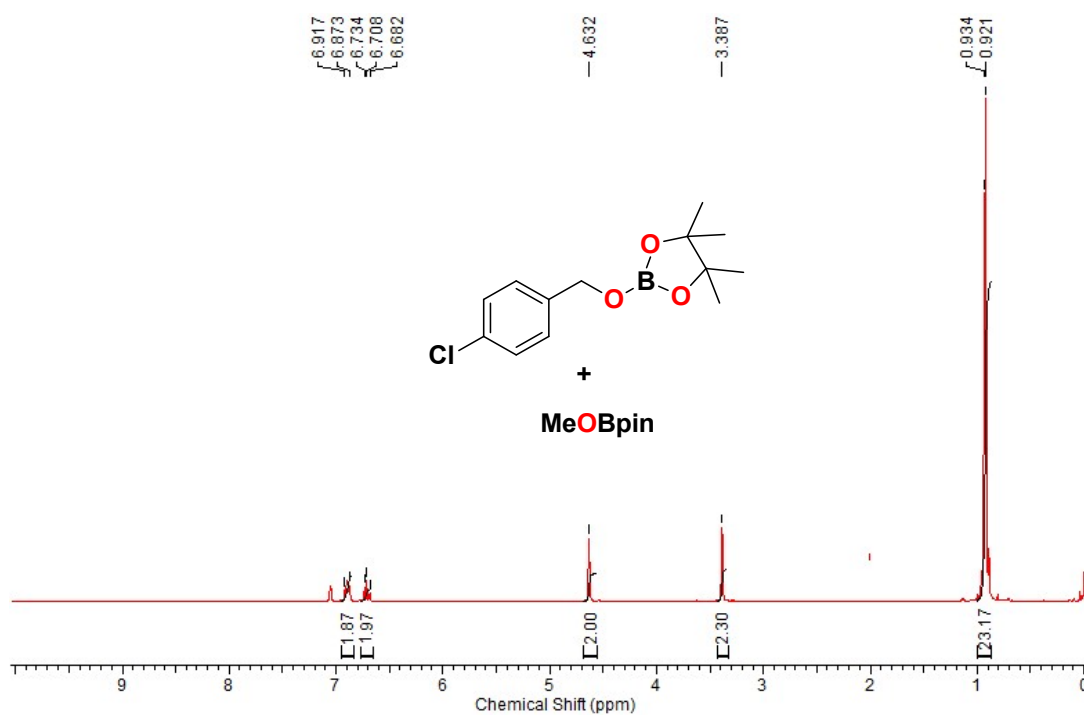

Figure S21.  $^1\text{H}$  NMR spectrum (400 MHz, 25°C,  $\text{C}_6\text{D}_6$ ) of compound **3f** and **3b**.

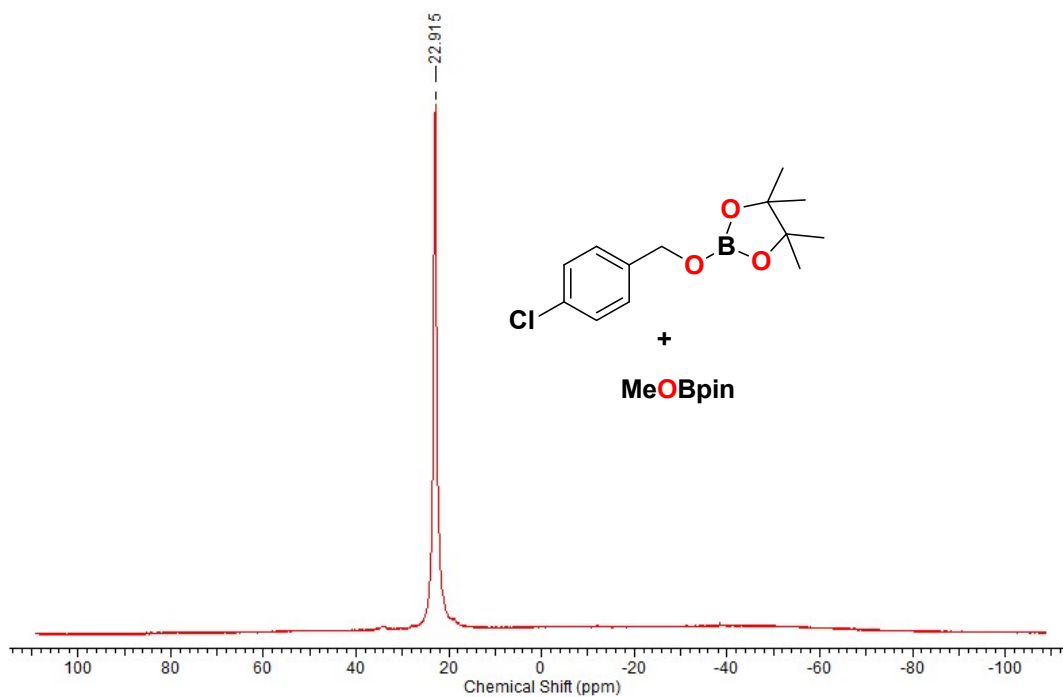

**Figure S22.**  $^{11}\text{B}$  NMR spectrum (128.4 MHz, 25°C,  $\text{C}_6\text{D}_6$ ) of compound **3f** and **3b**.

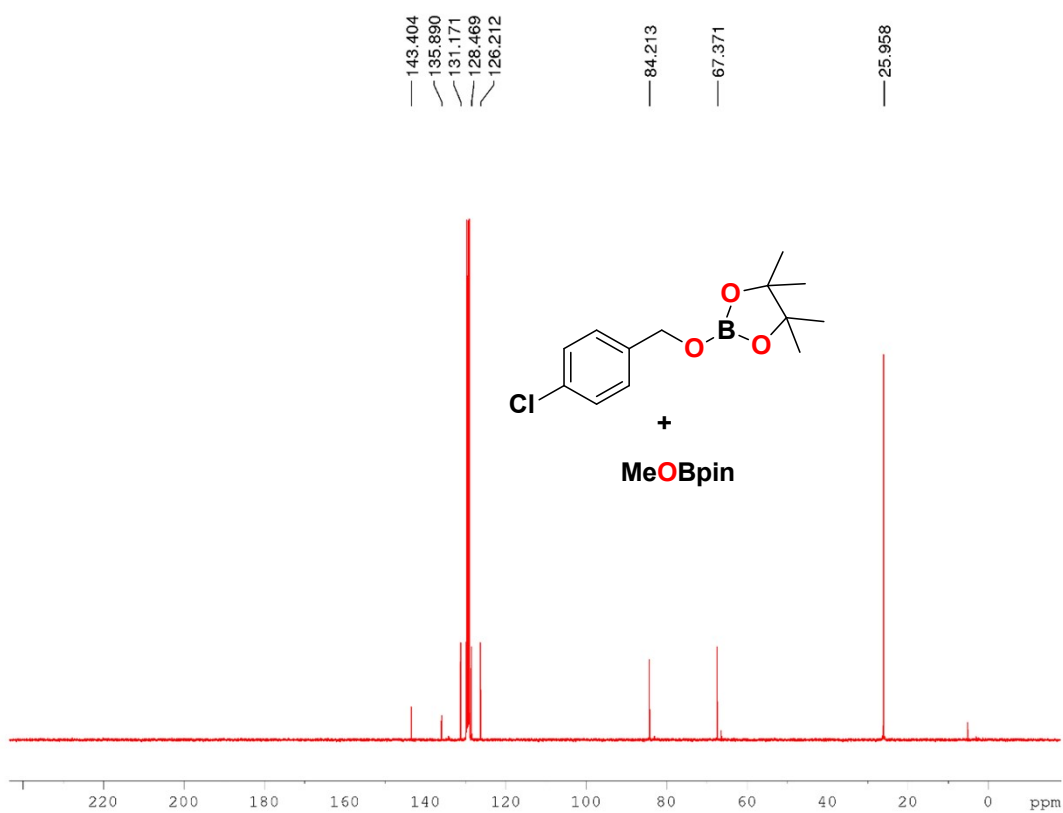

**Figure S23.**  $^{13}\text{C}$  NMR spectrum (100 MHz, 25°C,  $\text{C}_6\text{D}_6$ ) of compound **3f** and **3b**.

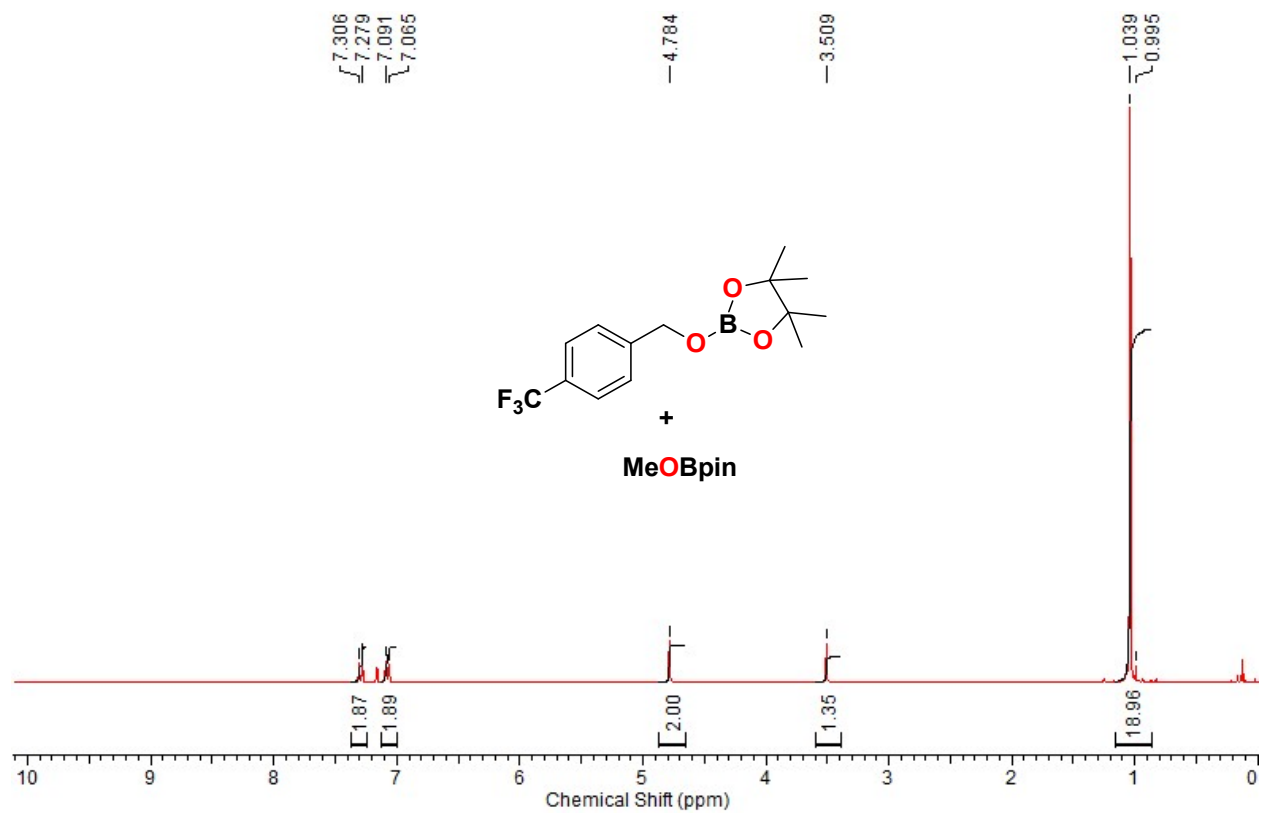

Figure 24. <sup>1</sup>H NMR spectrum (400 MHz, 25°C, C<sub>6</sub>D<sub>6</sub>) of compound **3g** and **3b**.

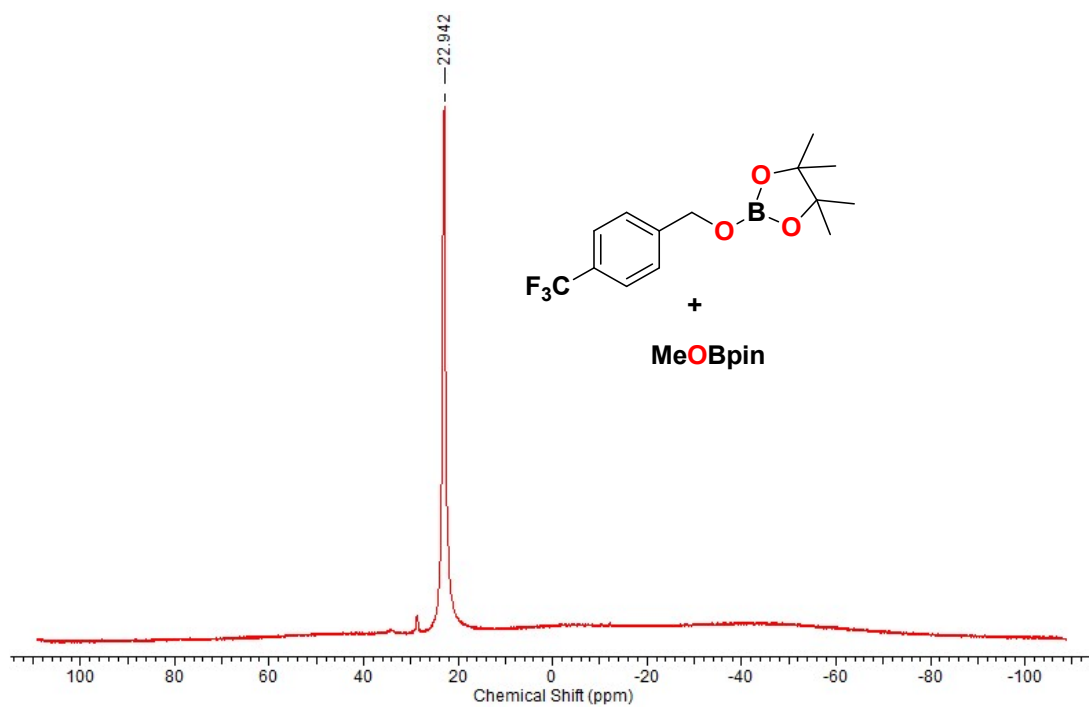

Figure S25. <sup>11</sup>B NMR spectrum (128.4 MHz, 25°C, C<sub>6</sub>D<sub>6</sub>) of compound **3g** and **3b**.

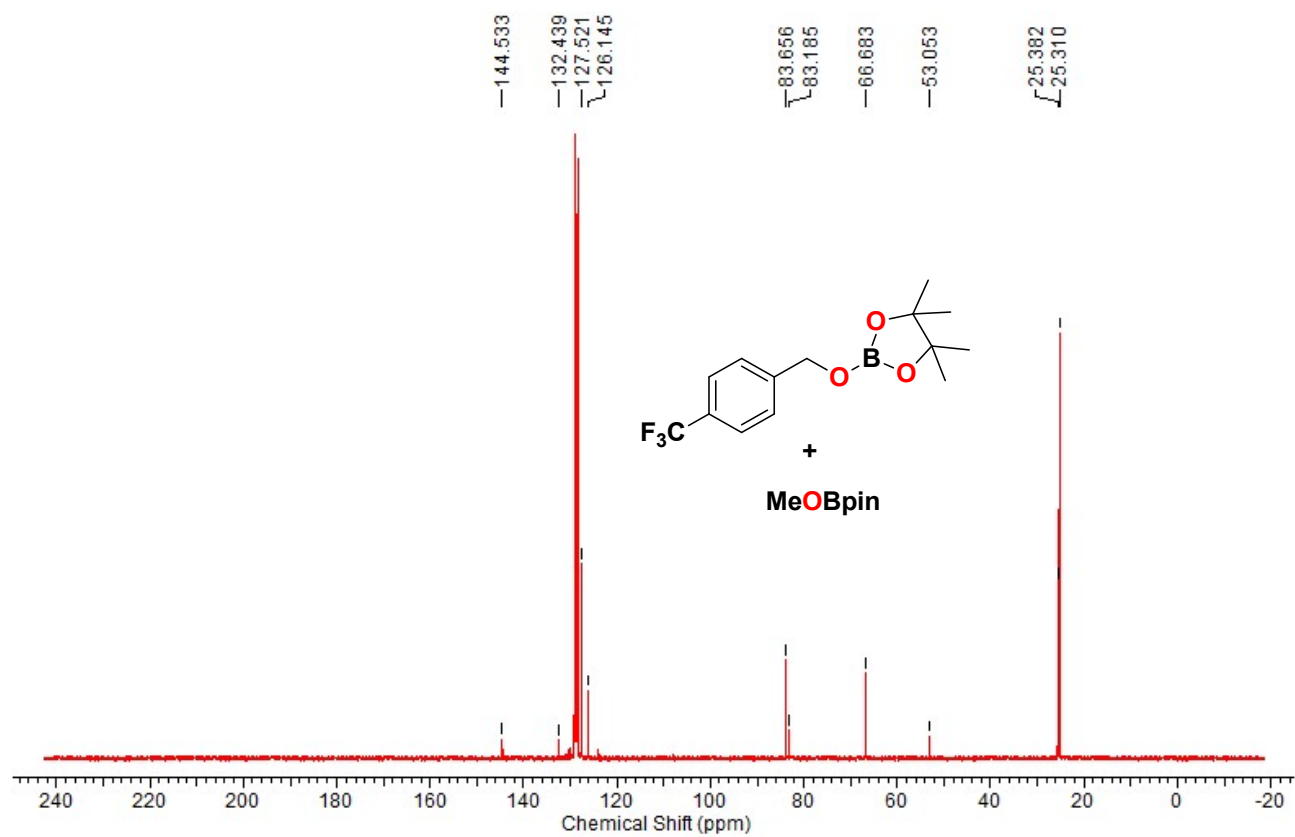

Figure S26.  $^{13}\text{C}$  NMR spectrum (100 MHz, 25°C,  $\text{C}_6\text{D}_6$ ) of compound **3g** and **3b**.

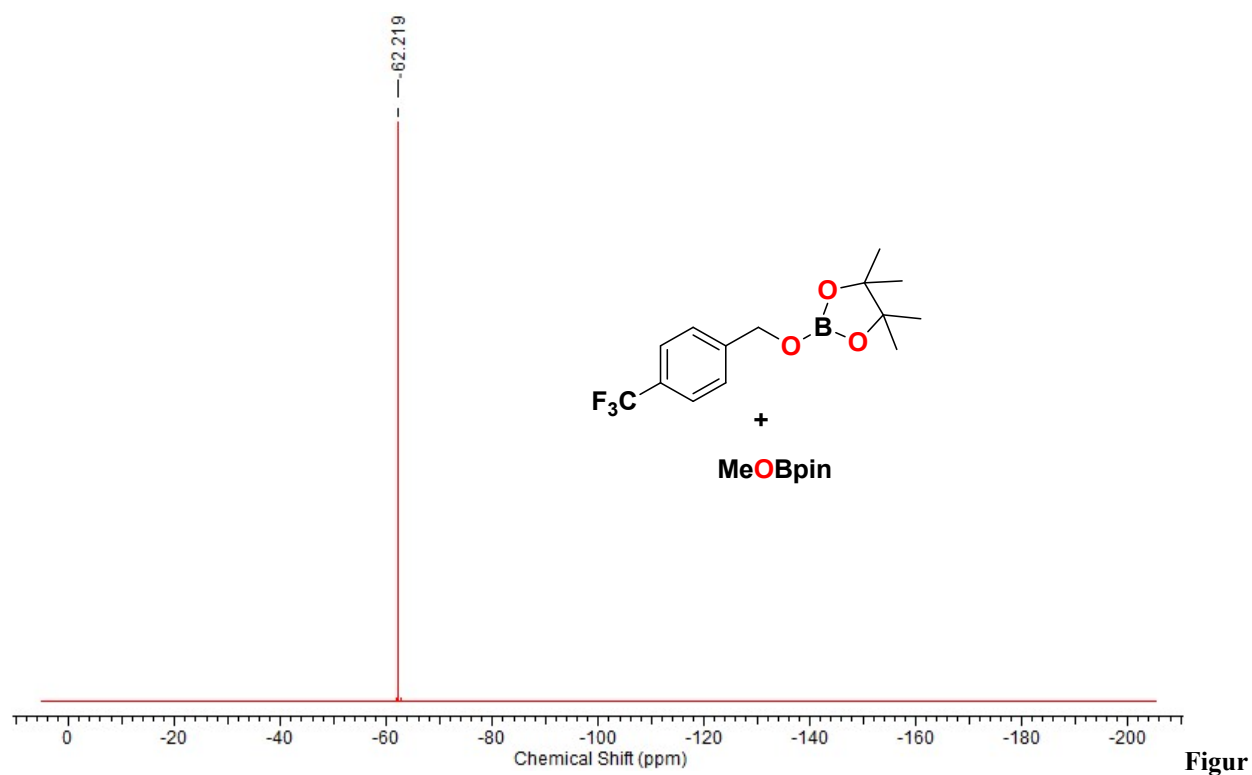

e S27.  $^{19}\text{F}$  NMR spectrum (376.5 MHz, 25°C,  $\text{C}_6\text{D}_6$ ) of compound **3g** and **3b**.

Figur

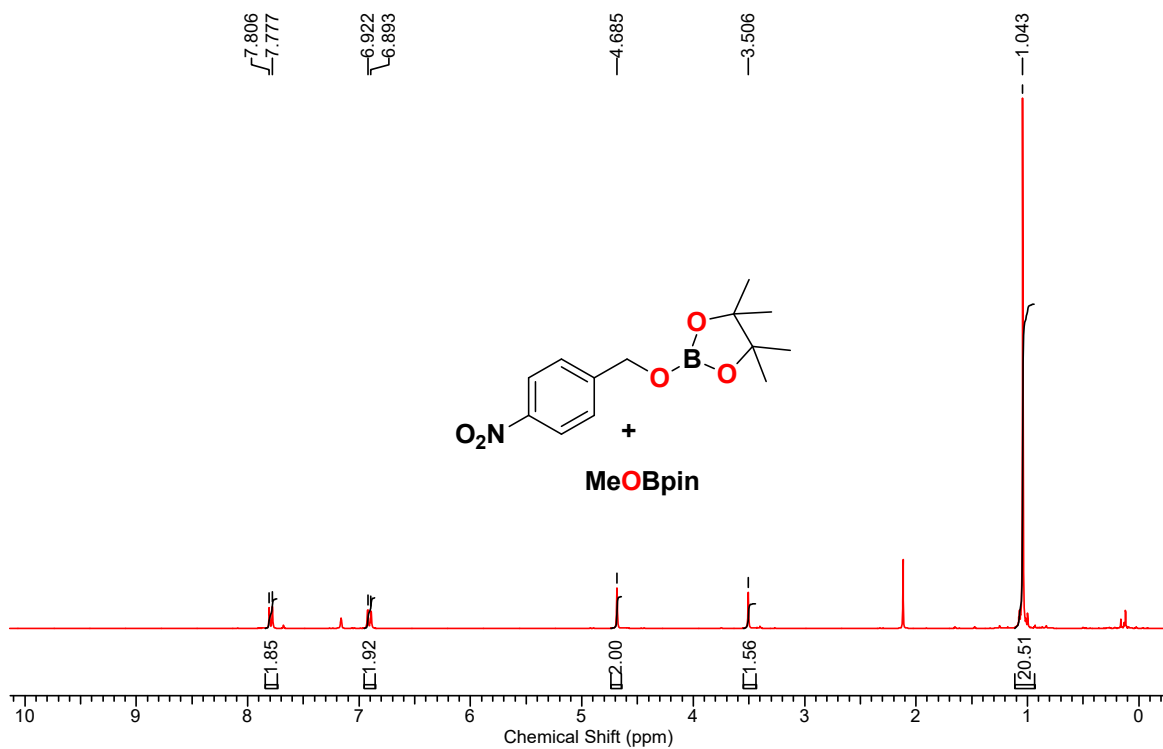

Figure S28.  $^1\text{H}$  NMR spectrum (400 MHz, 25°C,  $\text{C}_6\text{D}_6$ ) of compound **3h** and **3b**.

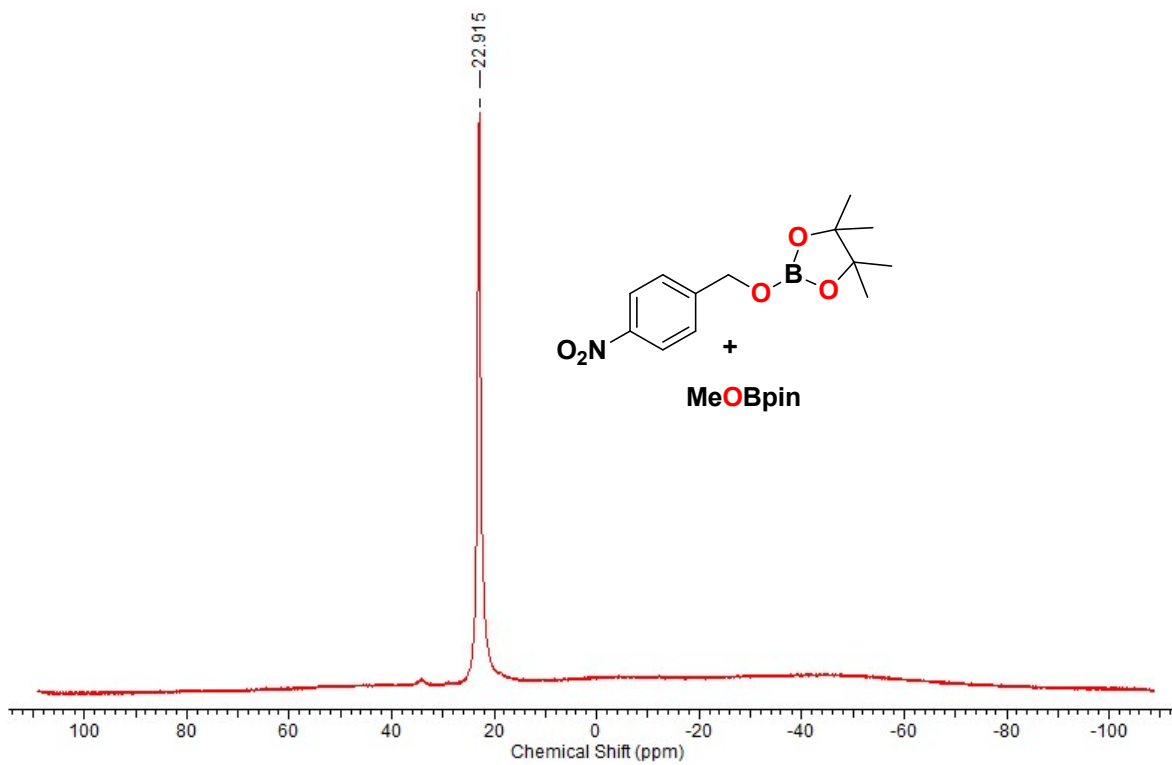

Figure S29.  $^{11}\text{B}$  NMR spectrum (128.4 MHz, 25°C,  $\text{C}_6\text{D}_6$ ) of compound **3h** and **3b**.

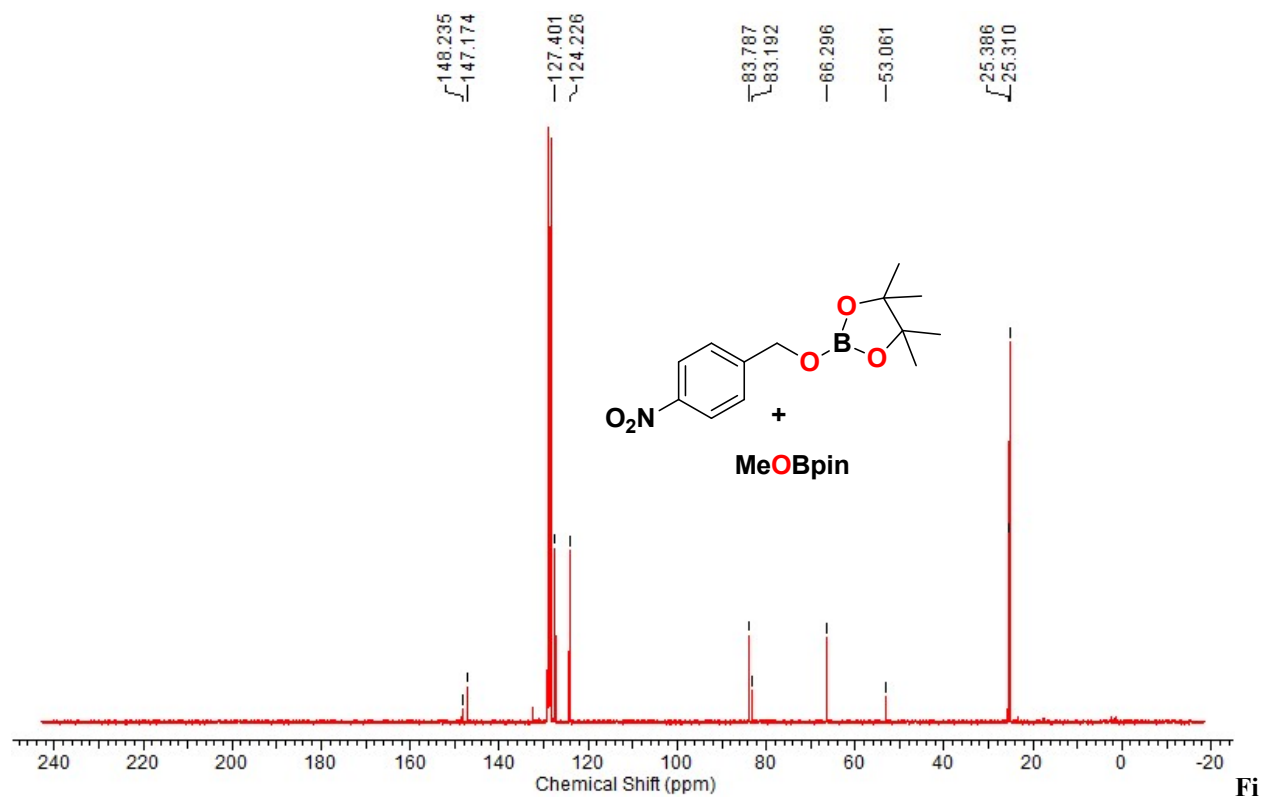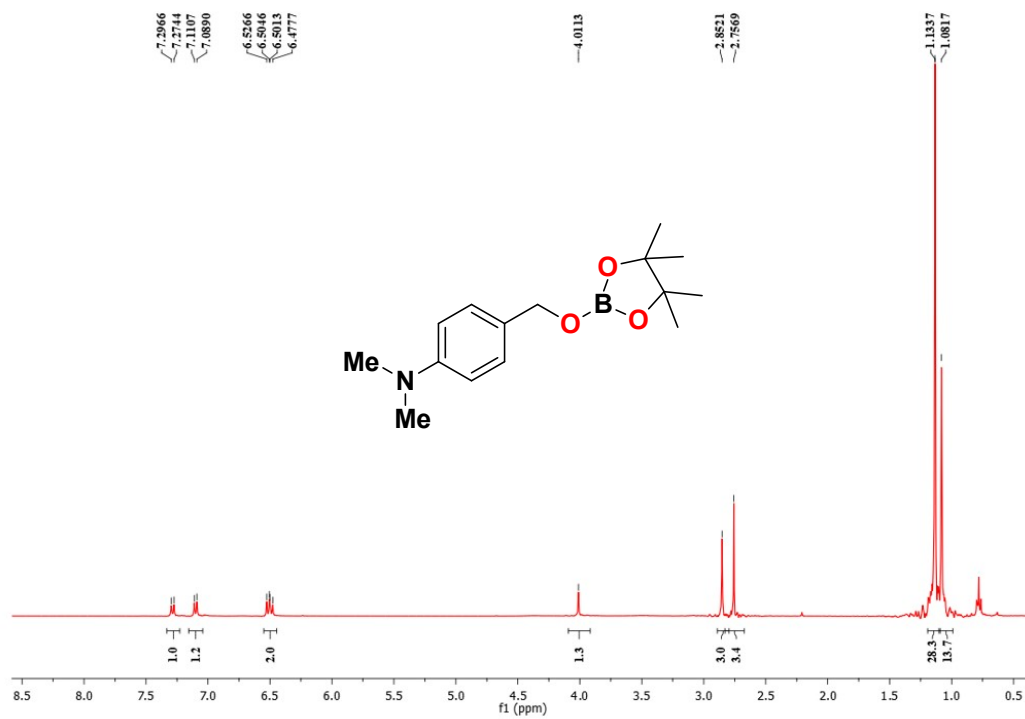



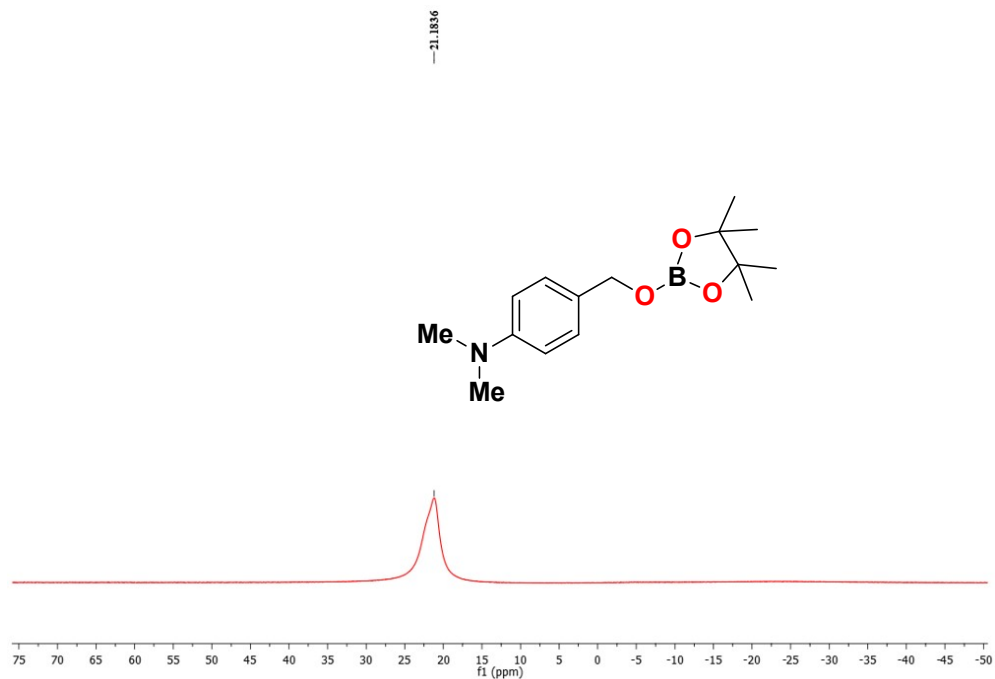

**Figure S32.**  $^{11}\text{B}$  NMR spectrum (128.4 MHz, 25°C,  $\text{CDCl}_3$ ) of compound **3i**.

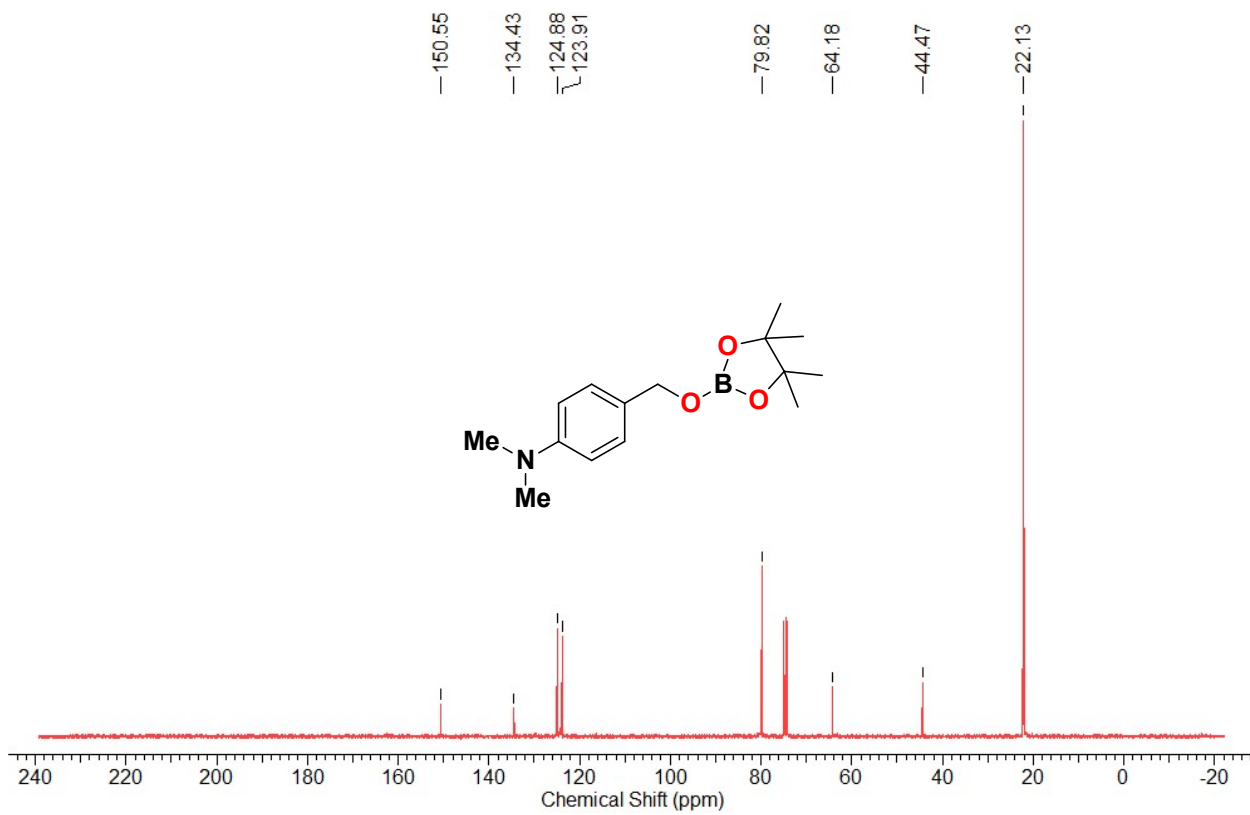

**Figure S33.**  $^{13}\text{C}$  NMR spectrum (100 MHz, 25°C,  $\text{CDCl}_3$ ) of compound **3i**.

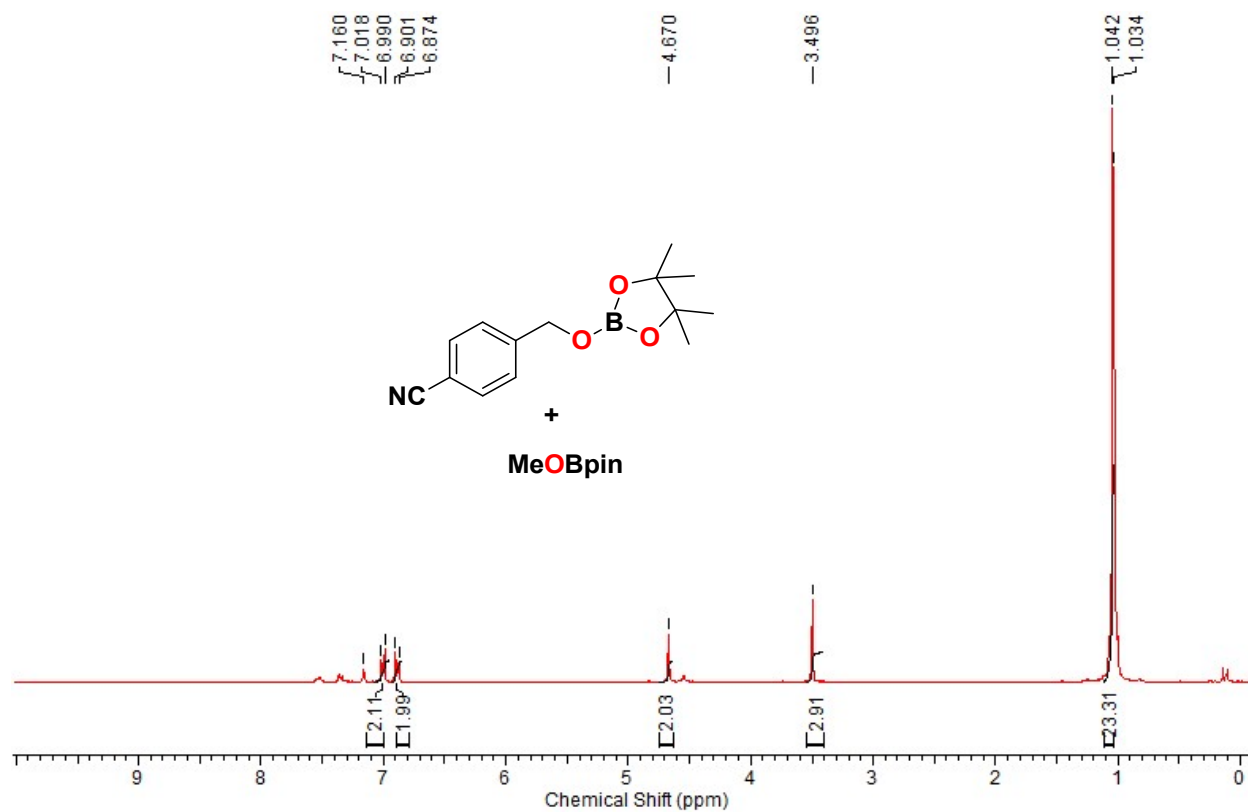

Figure S34.  $^1\text{H}$  NMR spectrum (400 MHz, 25°C,  $\text{CDCl}_3$ ) of compound **3j** and **3b**.

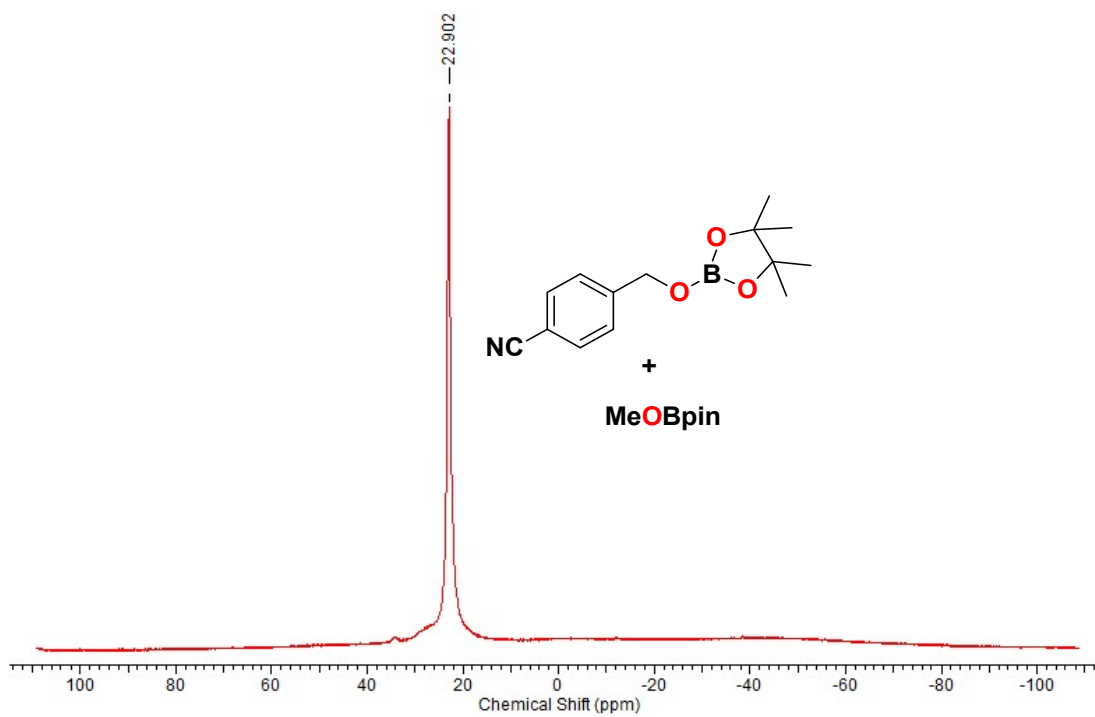

Figure S35.  $^{11}\text{B}$  NMR spectrum (128.4 MHz, 25°C,  $\text{CDCl}_3$ ) of **3j** and **3b**.

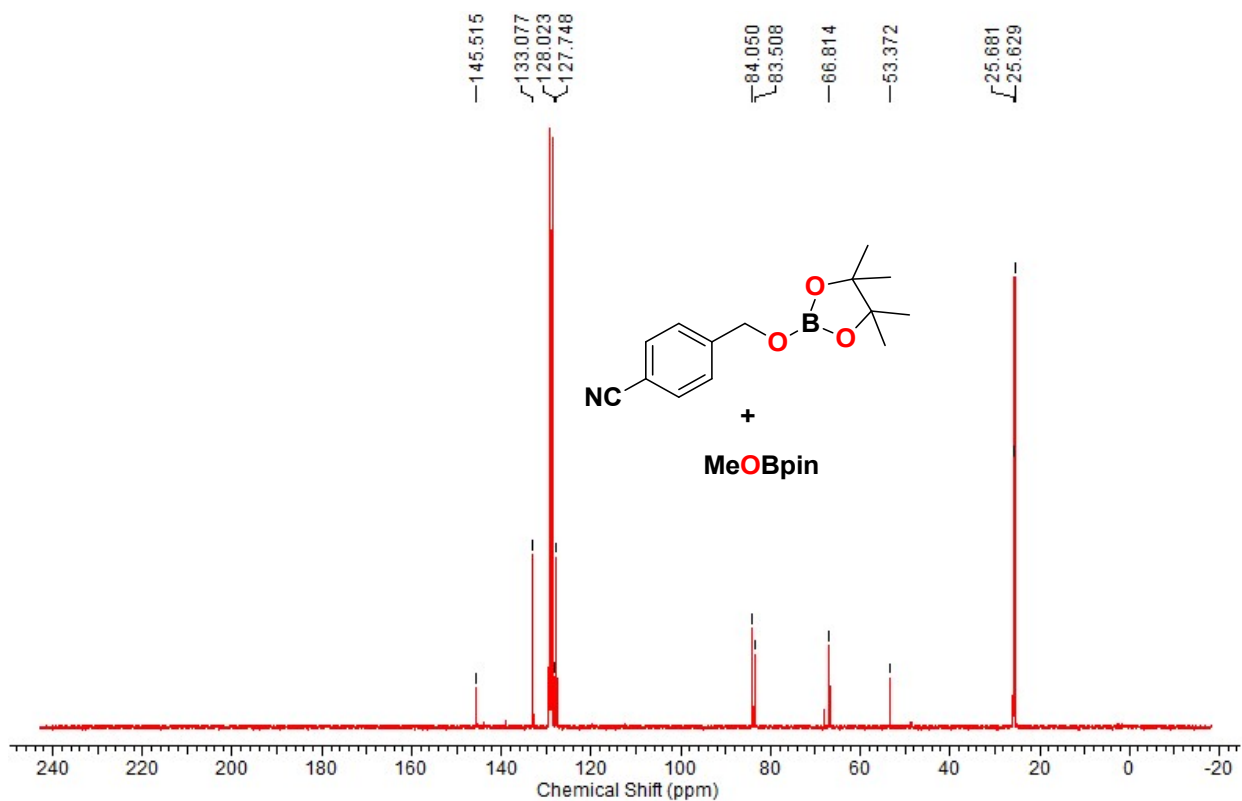

Figure S36.  $^{13}\text{C}$  NMR spectrum (100 MHz, 25°C,  $\text{CDCl}_3$ ) of compound **3j** and **3b**.

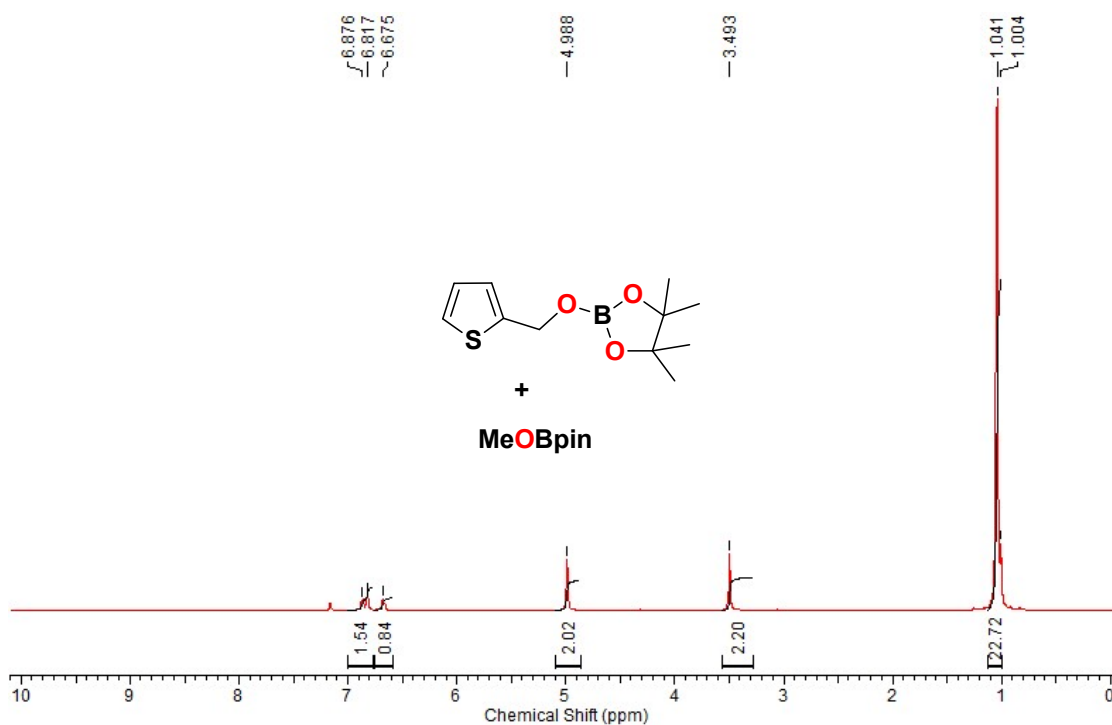

Figure S37.  $^1\text{H}$  NMR spectrum (400 MHz, 25°C,  $\text{C}_6\text{D}_6$ ) of compound **3k** and **3b**.

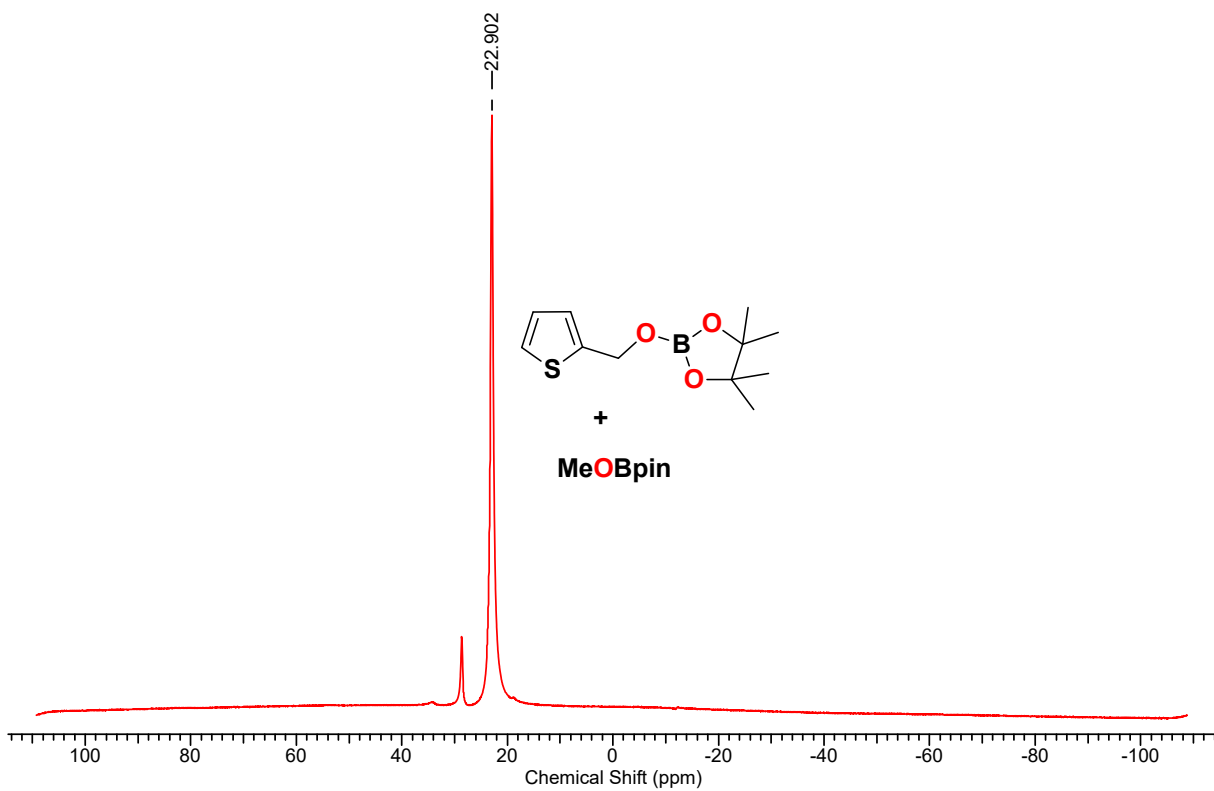

Figure S38.  $^{11}\text{B}$  NMR spectrum (128.4 MHz, 25°C,  $\text{C}_6\text{D}_6$ ) of compound **3k** and **3b**.

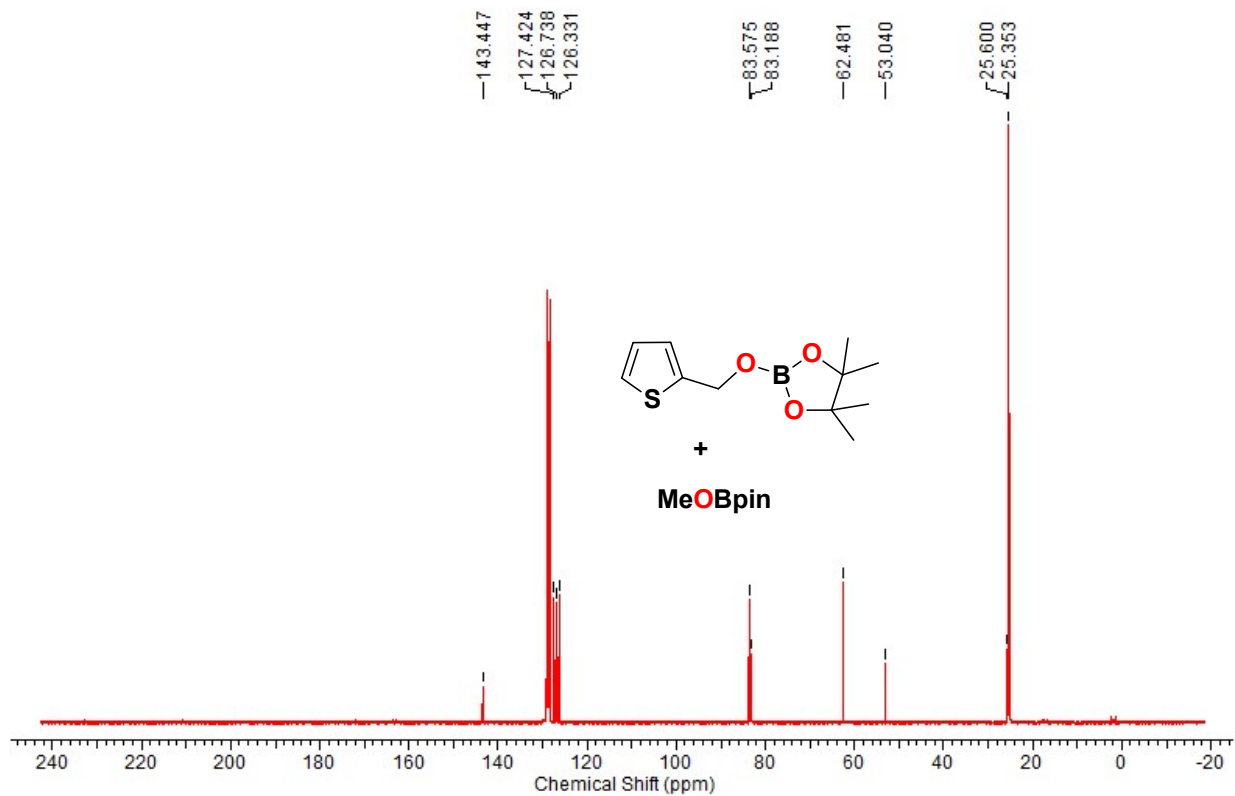

Figure S39.  $^{13}\text{C}$  NMR spectrum (100 MHz, 25°C,  $\text{C}_6\text{D}_6$ ) of compound **3k** and **3b**.

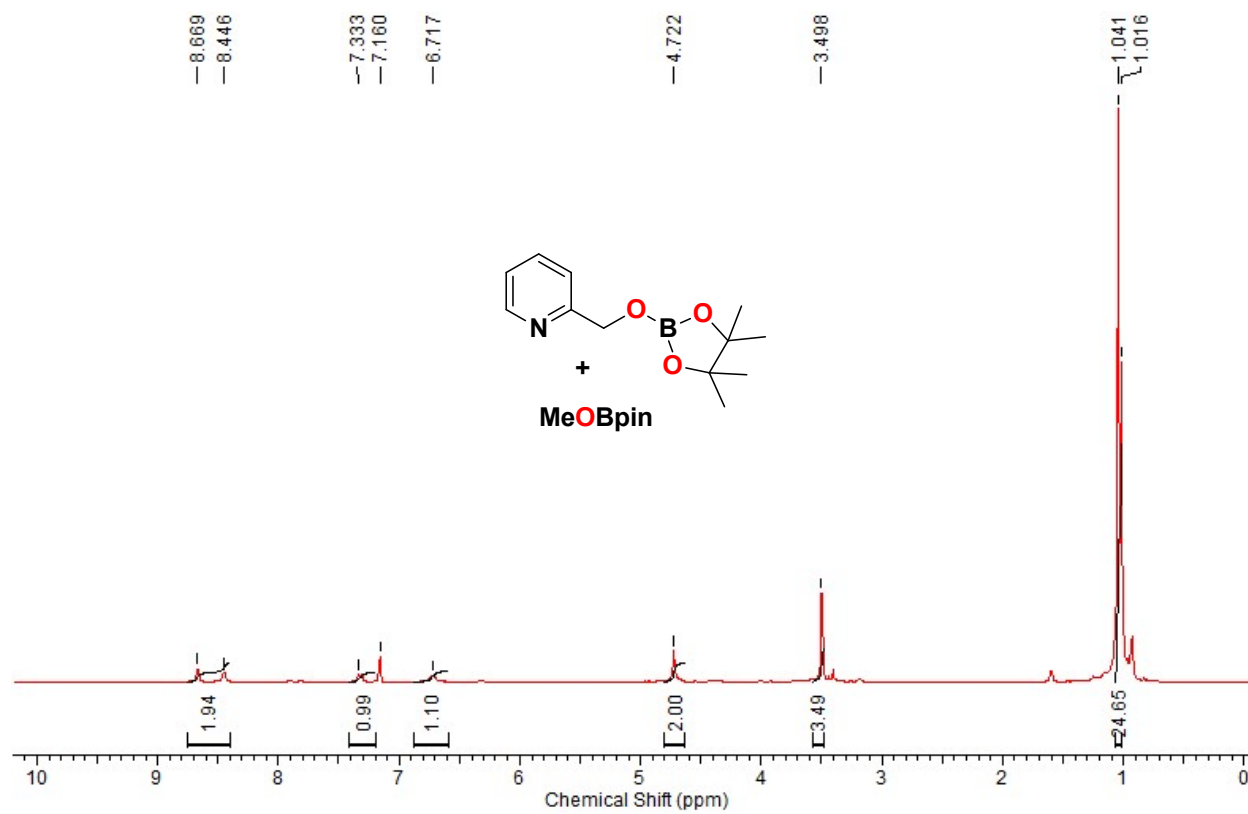

**Figure S40.** <sup>1</sup>H NMR spectrum (400 MHz, 25°C, CDCl<sub>3</sub>) of compound **31** and **3b**.

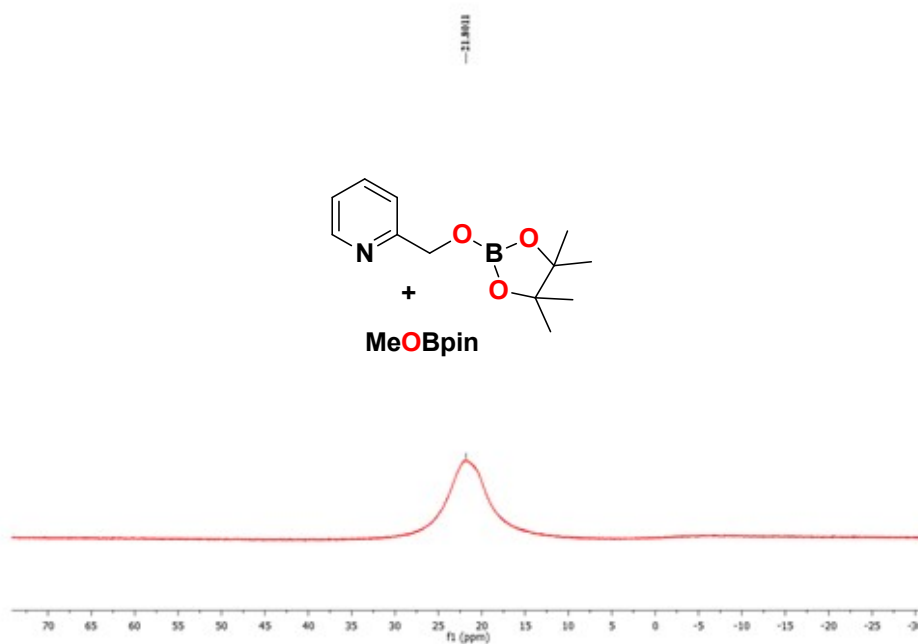

**Figure S41.** <sup>11</sup>B NMR spectrum (128.4 MHz, 25°C, CDCl<sub>3</sub>) of compound **31** and **3b**.

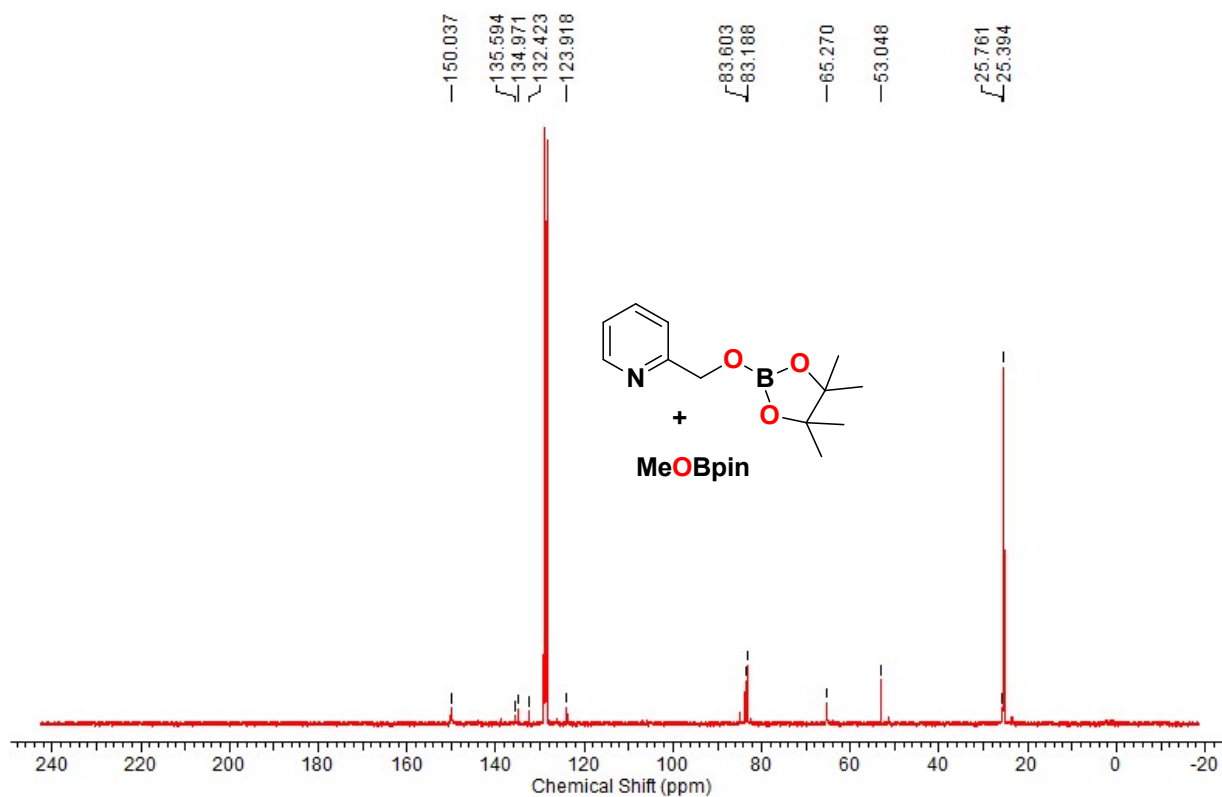

Figure S42.  $^{13}\text{C}$  NMR spectrum (400 MHz, 25°C,  $\text{CDCl}_3$ ) of compound **3l** and **3b**.

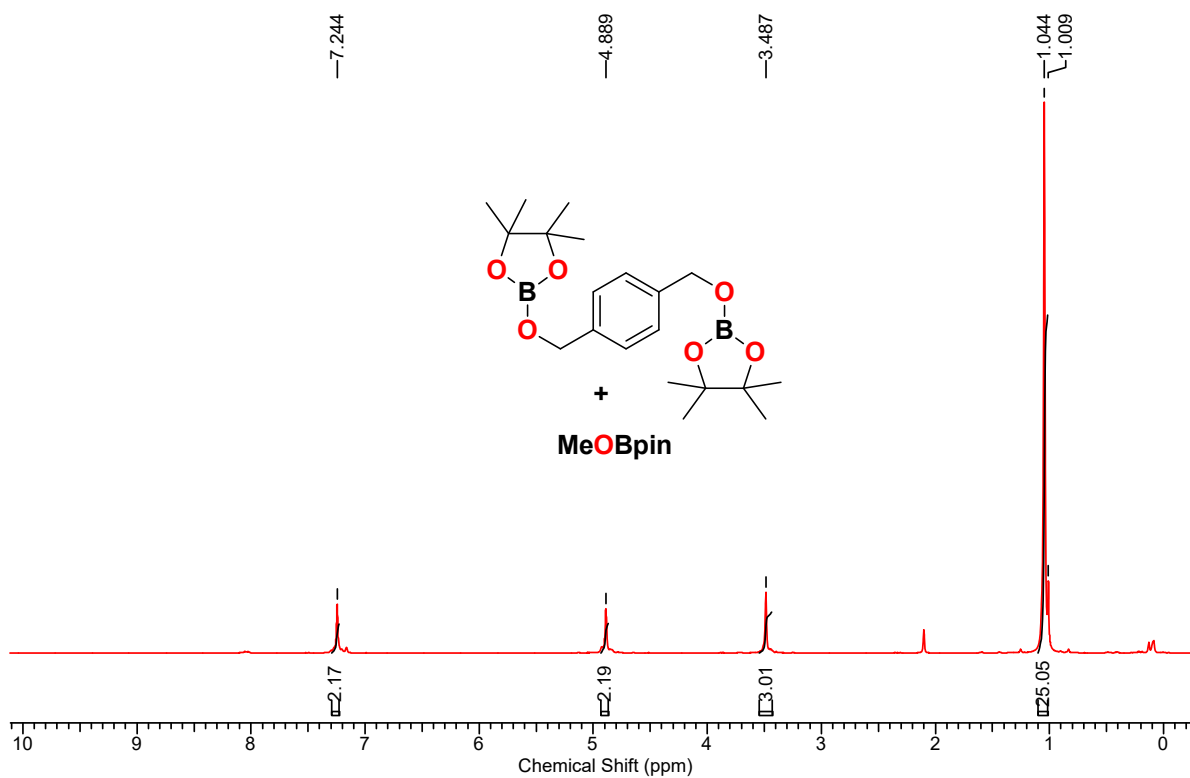

Figure S43.  $^1\text{H}$  NMR spectrum (400 MHz, 25°C,  $\text{CDCl}_3$ ) of compound **3m** and **3b**.

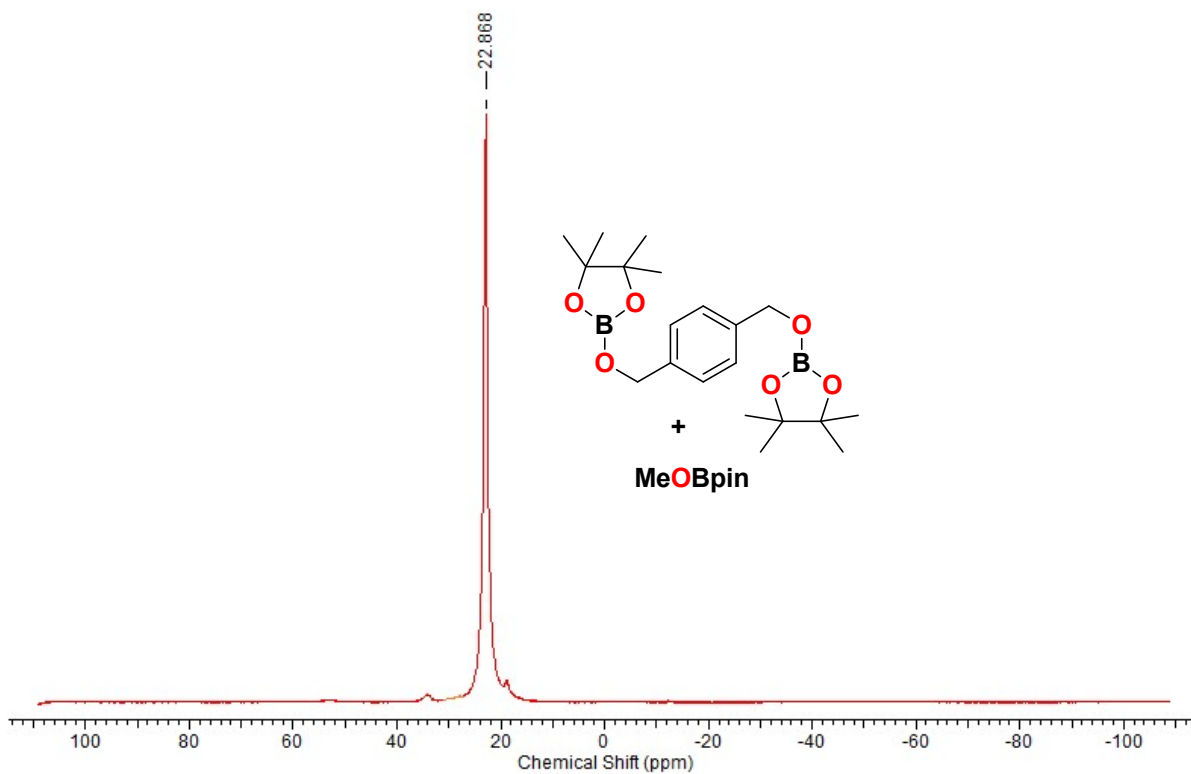

Figure S44.  $^{11}\text{B}$  NMR spectrum (128.4 MHz, 25°C,  $\text{CDCl}_3$ ) of compound **3m** and **3b**.

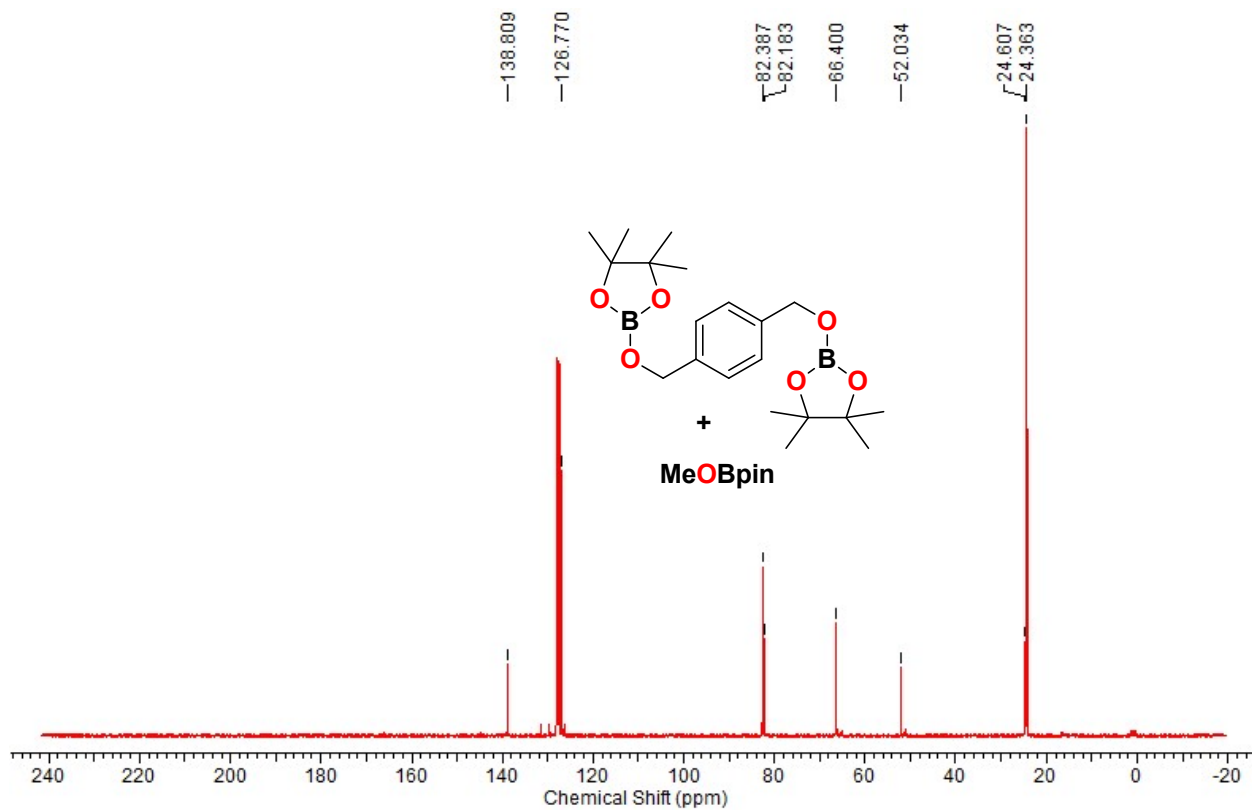

Figure S45.  $^{13}\text{C}$  NMR spectrum (100 MHz, 25°C,  $\text{CDCl}_3$ ) of compound **3m** and **3b**.

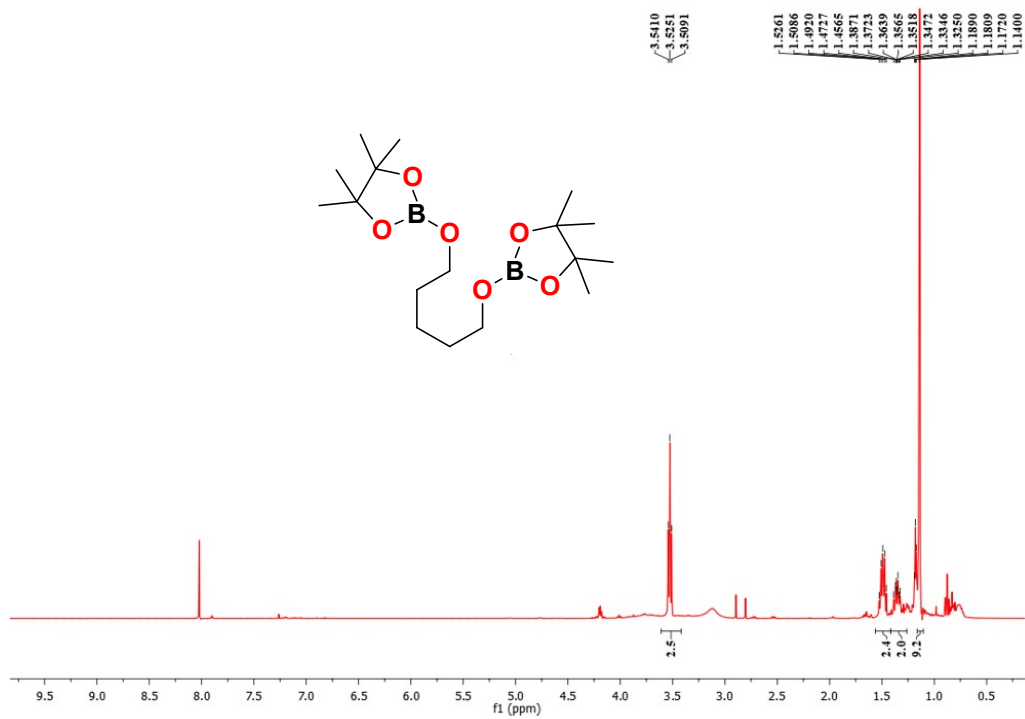

**Figure S46.**  $^1\text{H}$  NMR spectrum (400 MHz, 25°C,  $\text{CDCl}_3$ ) of compound **3n**.

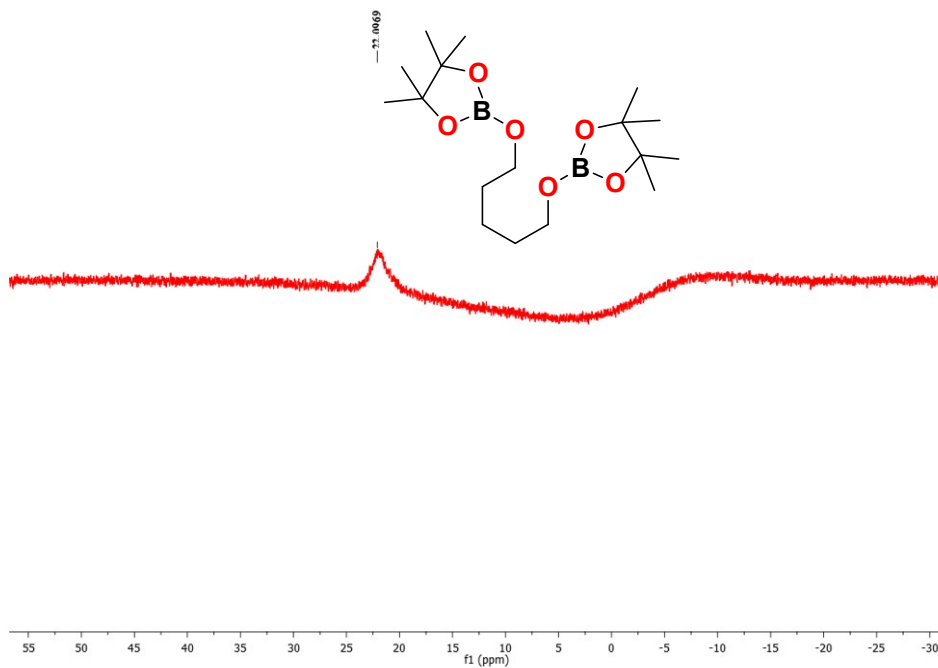

**Figure S47.**  $^{11}\text{B}$  NMR spectrum (128.4 MHz, 25°C,  $\text{CDCl}_3$ ) of compound **3n**.



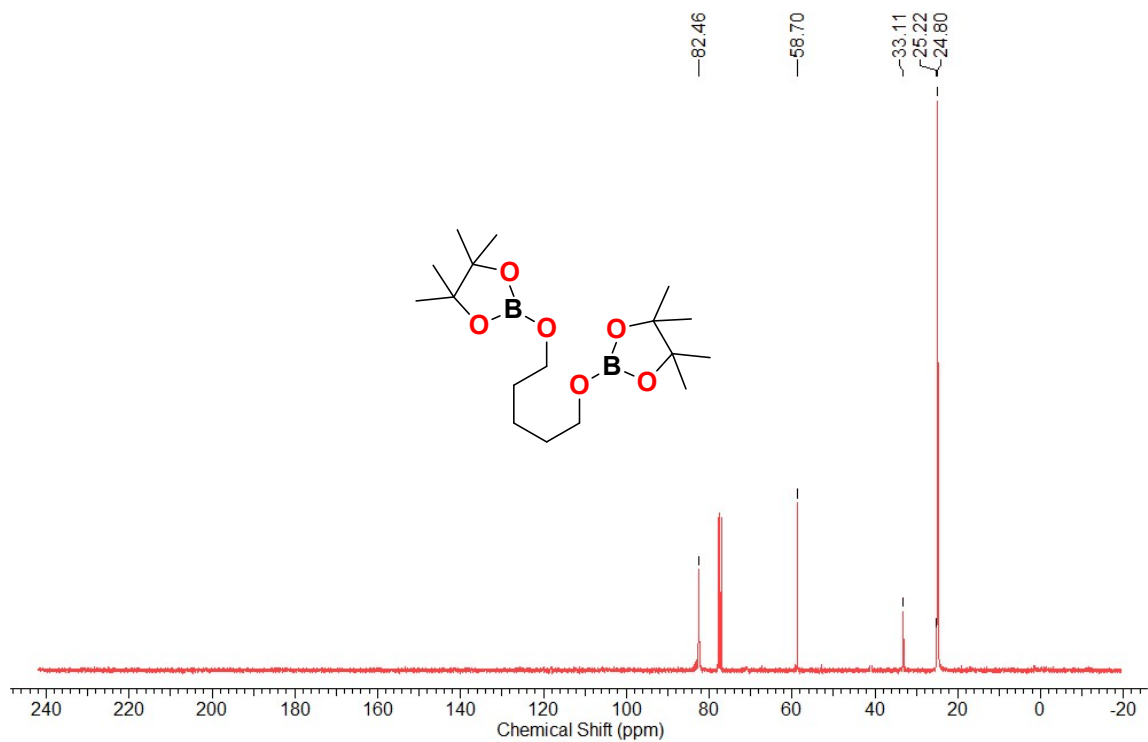

**Figure S48.**  $^{13}\text{C}$  NMR spectrum (100 MHz,  $25^\circ\text{C}$ ,  $\text{CDCl}_3$ ) of compound **3n**.

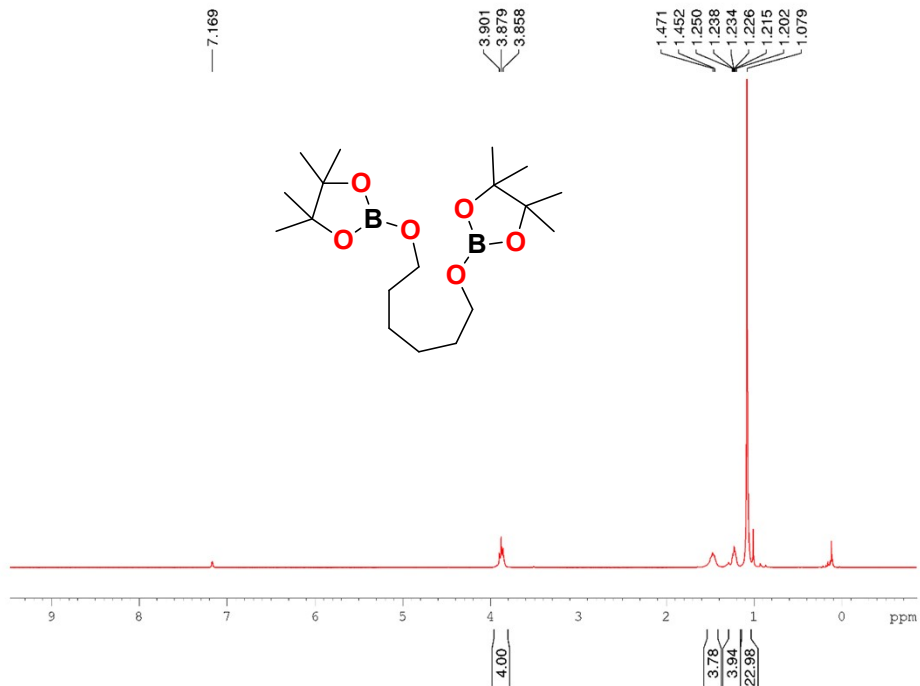

**Figure S49.**  $^1\text{H}$  NMR spectrum (400 MHz,  $25^\circ\text{C}$ ,  $\text{C}_6\text{D}_6$ ) of compound **3o**.

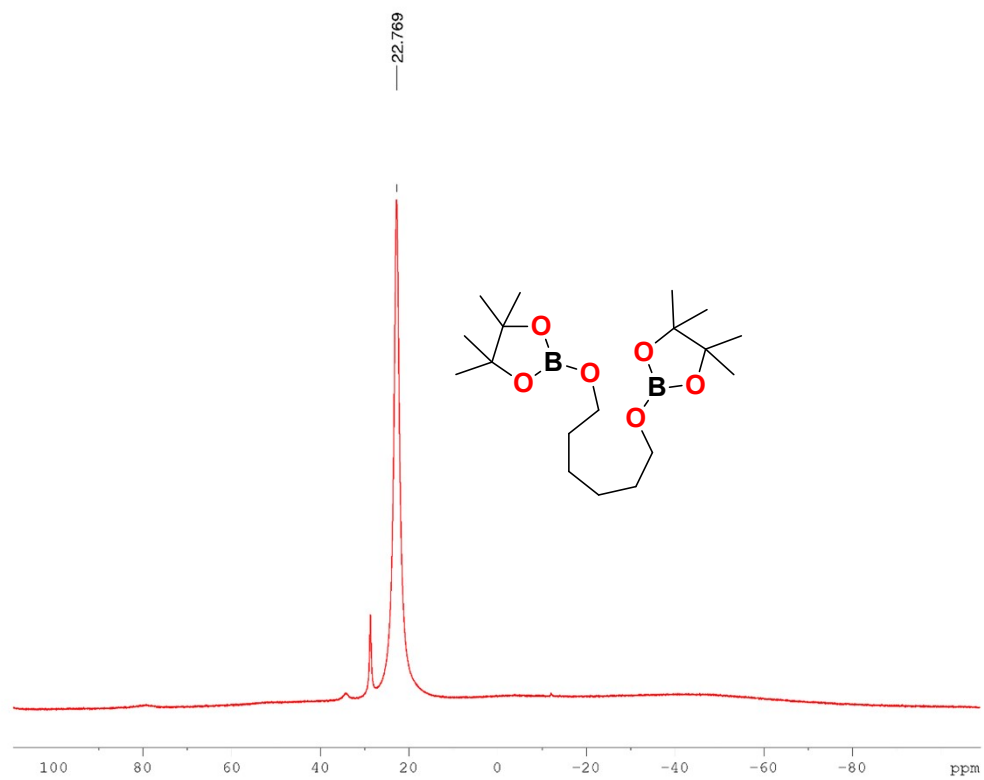

**Figure S50.** <sup>11</sup>B NMR spectrum (128.4 MHz, 25°C, C<sub>6</sub>D<sub>6</sub>) of compound **3o**.

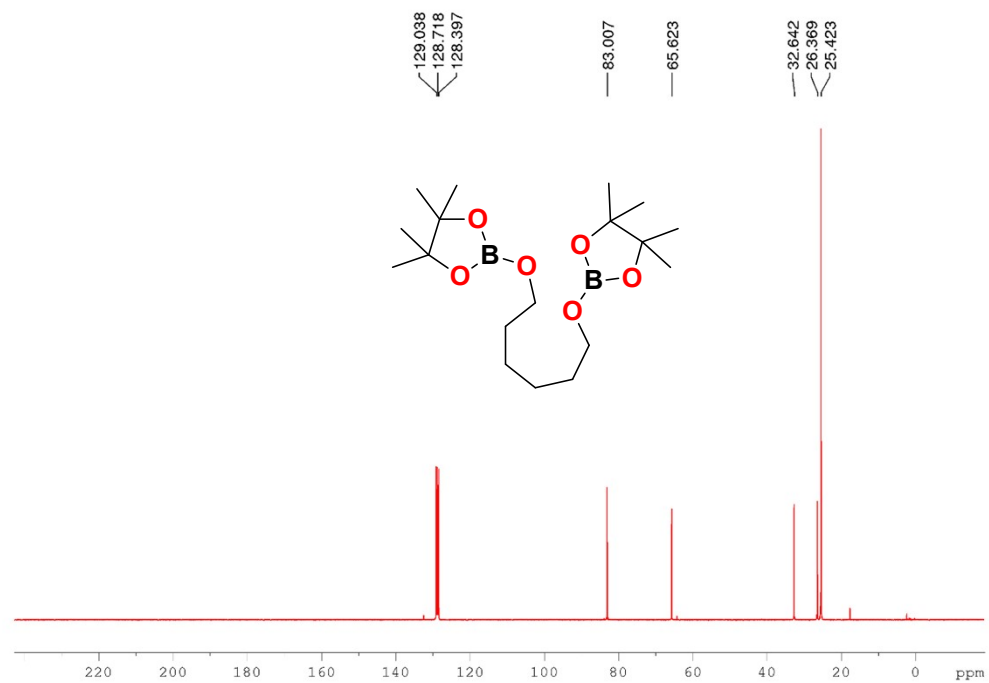

**Figure S51.** <sup>13</sup>C NMR spectrum (100 MHz, 25°C, C<sub>6</sub>D<sub>6</sub>) of compound **3o**.

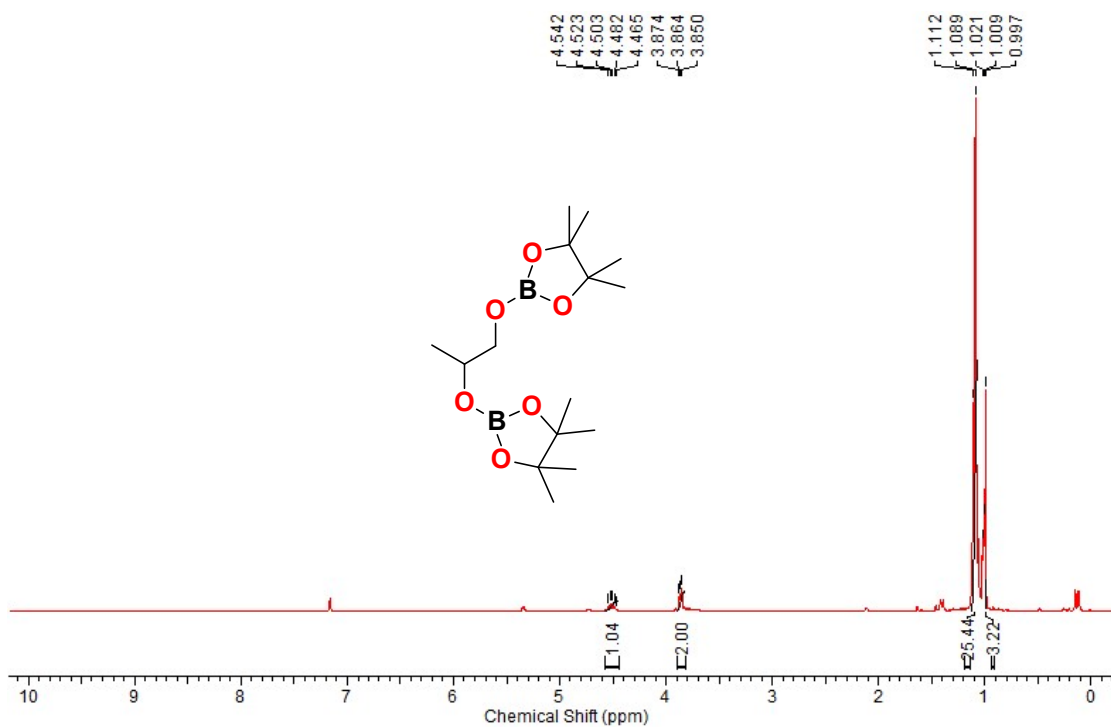

Figure S52.  $^1\text{H}$  NMR spectrum (400 MHz,  $25^\circ\text{C}$ ,  $\text{C}_6\text{D}_6$ ) of compound  $2 \times 3\text{p}$ .

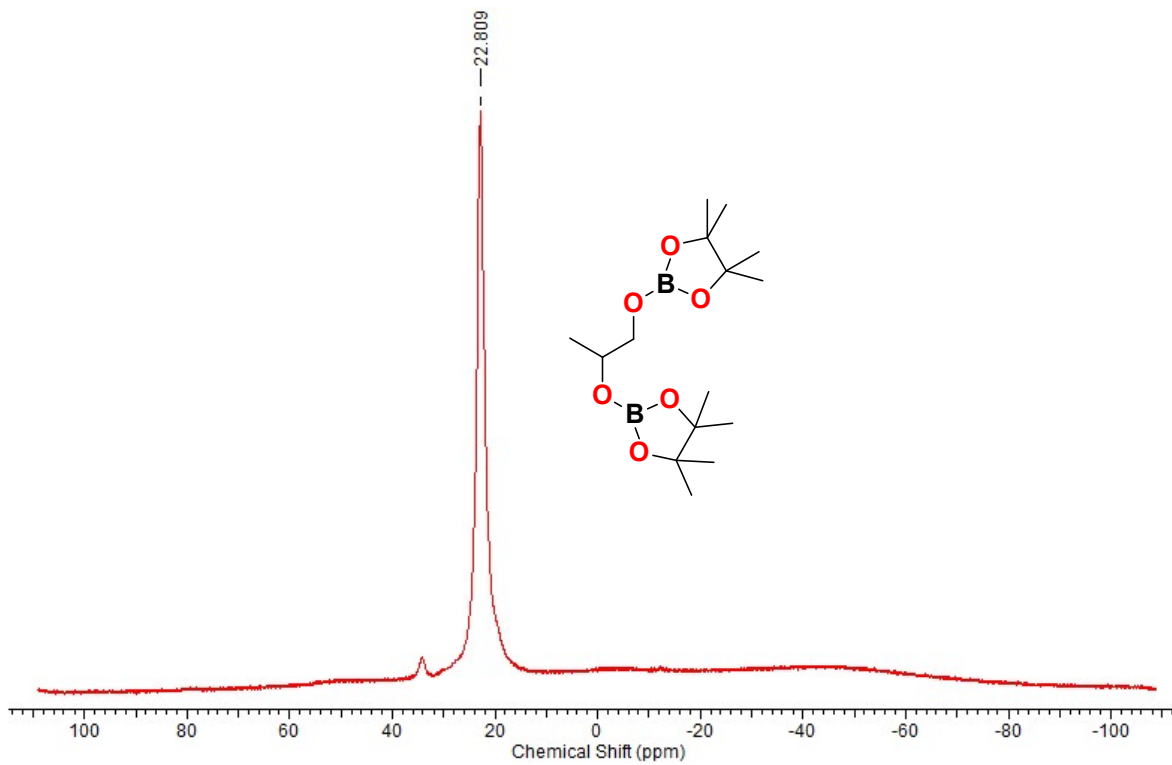

Figure S53.  $^{11}\text{B}$  NMR spectrum (128.4 MHz,  $25^\circ\text{C}$ ,  $\text{C}_6\text{D}_6$ ) of compound  $2 \times 3\text{p}$ .

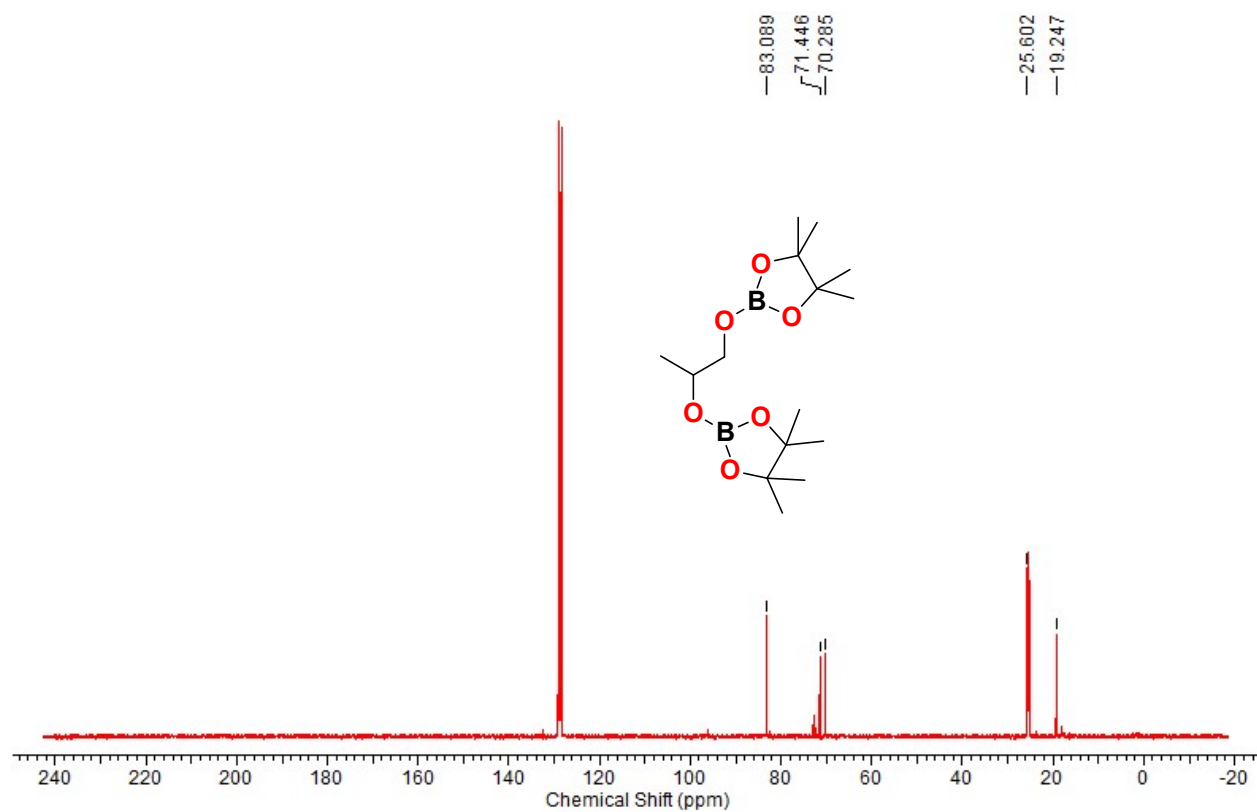

Figure S54.  $^{13}\text{C}$  NMR spectrum (100 MHz, 25°C,  $\text{C}_6\text{D}_6$ ) of compound 2 x 3p.

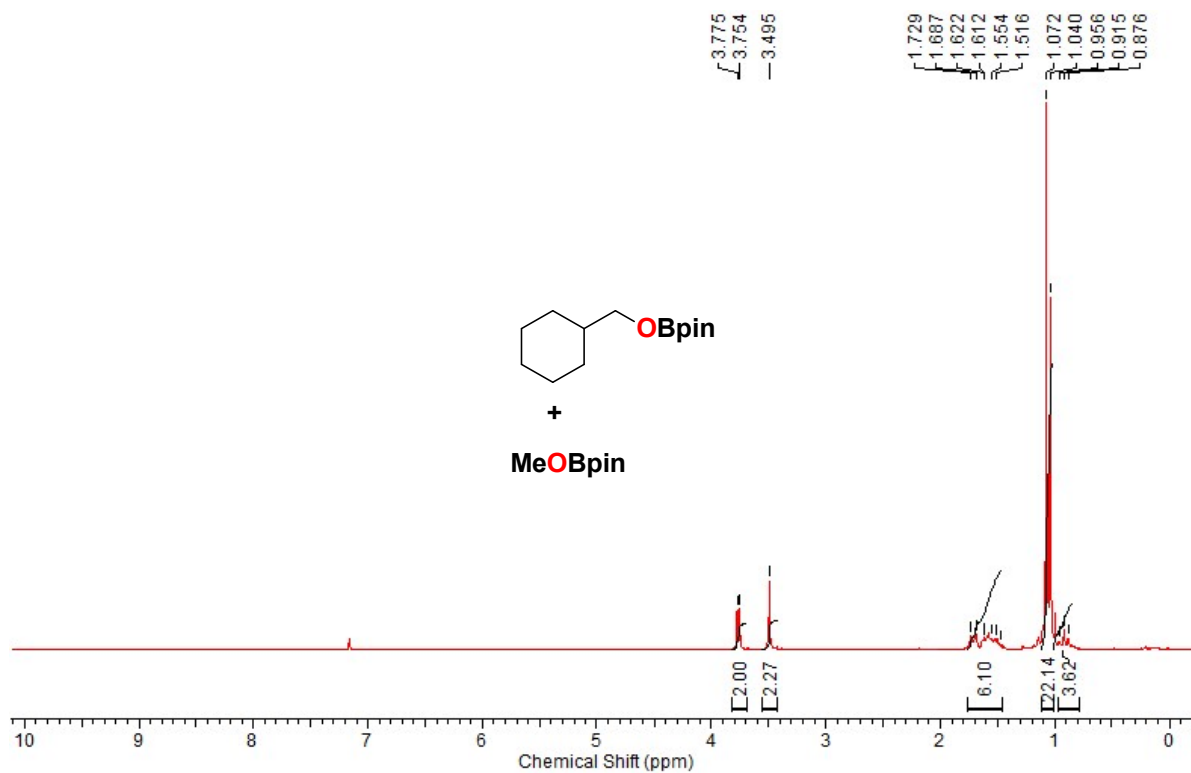

Figure S55.  $^1\text{H}$  NMR spectrum (400 MHz, 25°C,  $\text{C}_6\text{D}_6$ ) of compound 3q and 3b.

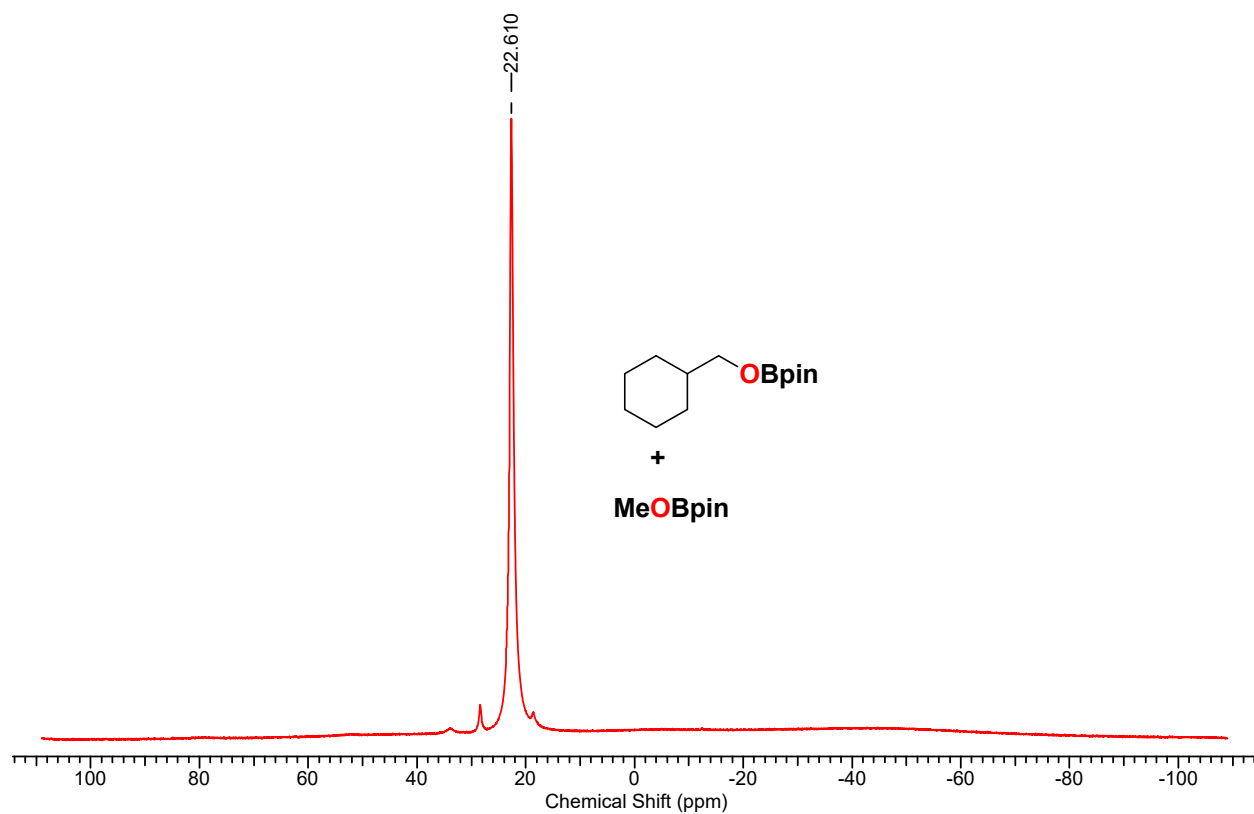

Figure S56.  $^{11}\text{B}$  NMR spectrum (128.4 MHz, 25°C,  $\text{C}_6\text{D}_6$ ) of compound **3q** and **3b**.

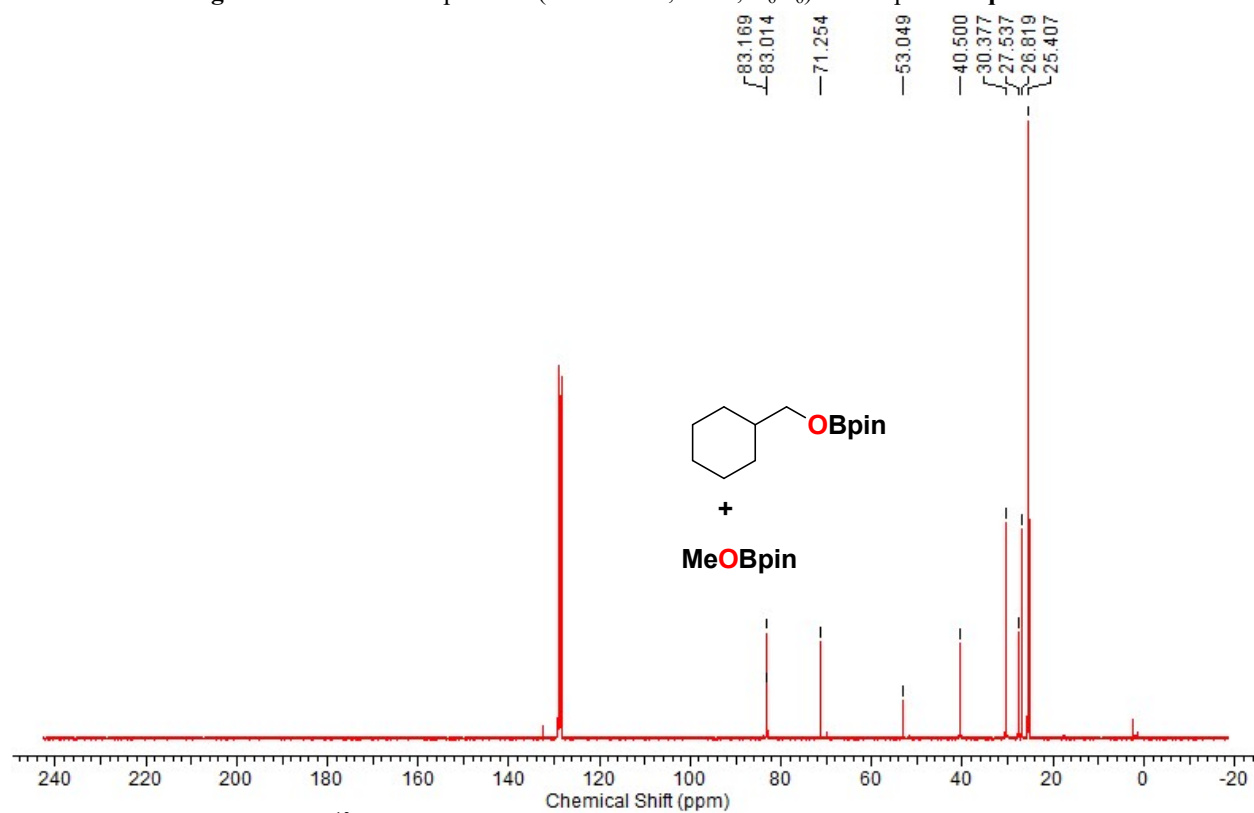

Figure S57.  $^{13}\text{C}$  NMR spectrum (100 MHz, 25°C,  $\text{C}_6\text{D}_6$ ) of compound **3q** and **3b**.

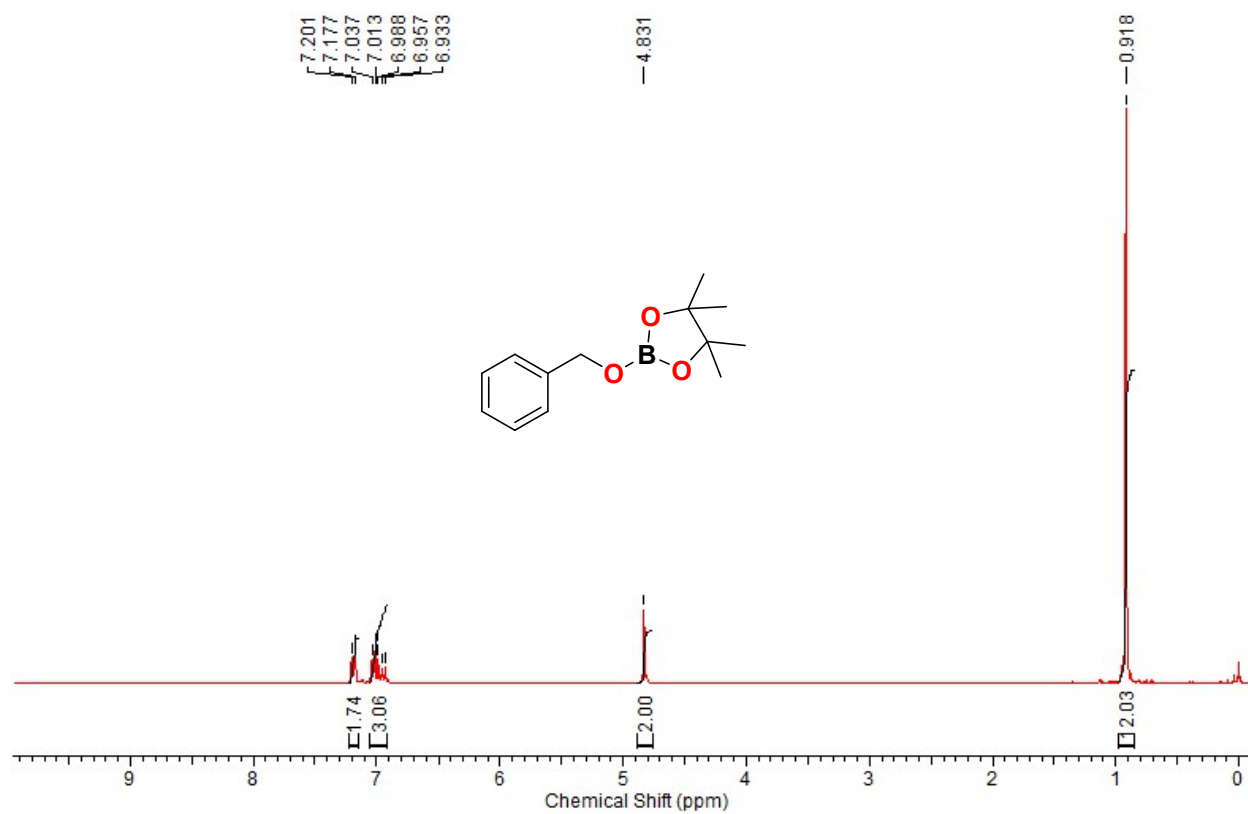

**Figure S58.** <sup>1</sup>H NMR spectrum (100 MHz, 25°C, C<sub>6</sub>D<sub>6</sub>) of compound 2 x 3a.

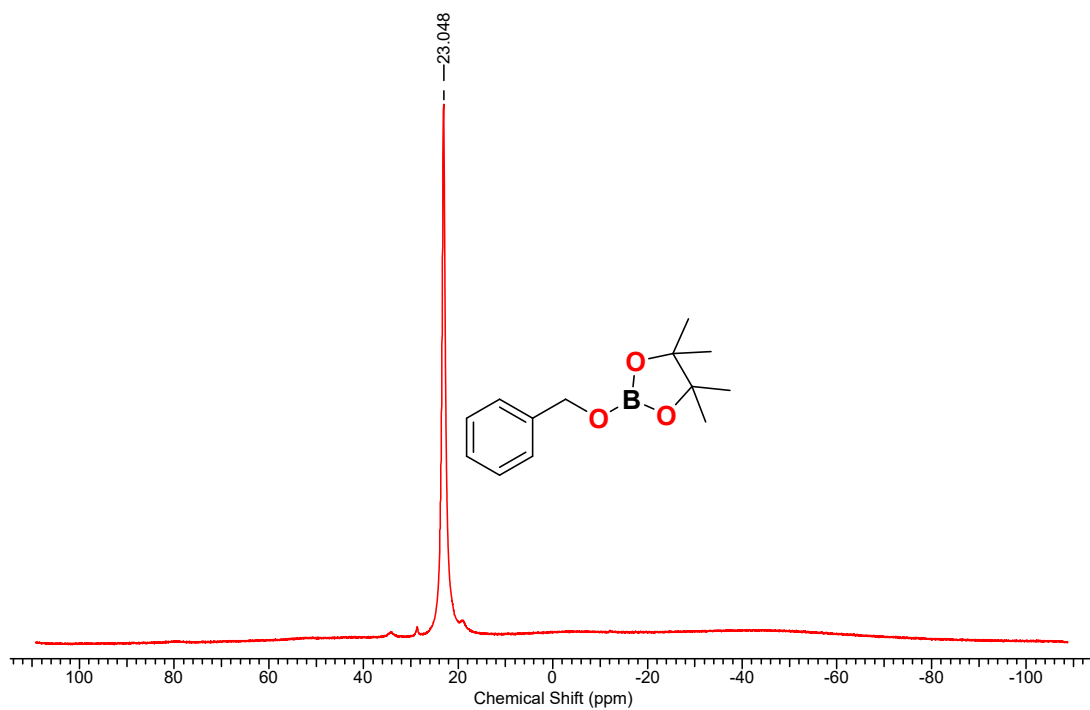

**Figure S59.** <sup>11</sup>B NMR spectrum (128.4 MHz, 25°C, C<sub>6</sub>D<sub>6</sub>) of compound 2 x 3a.

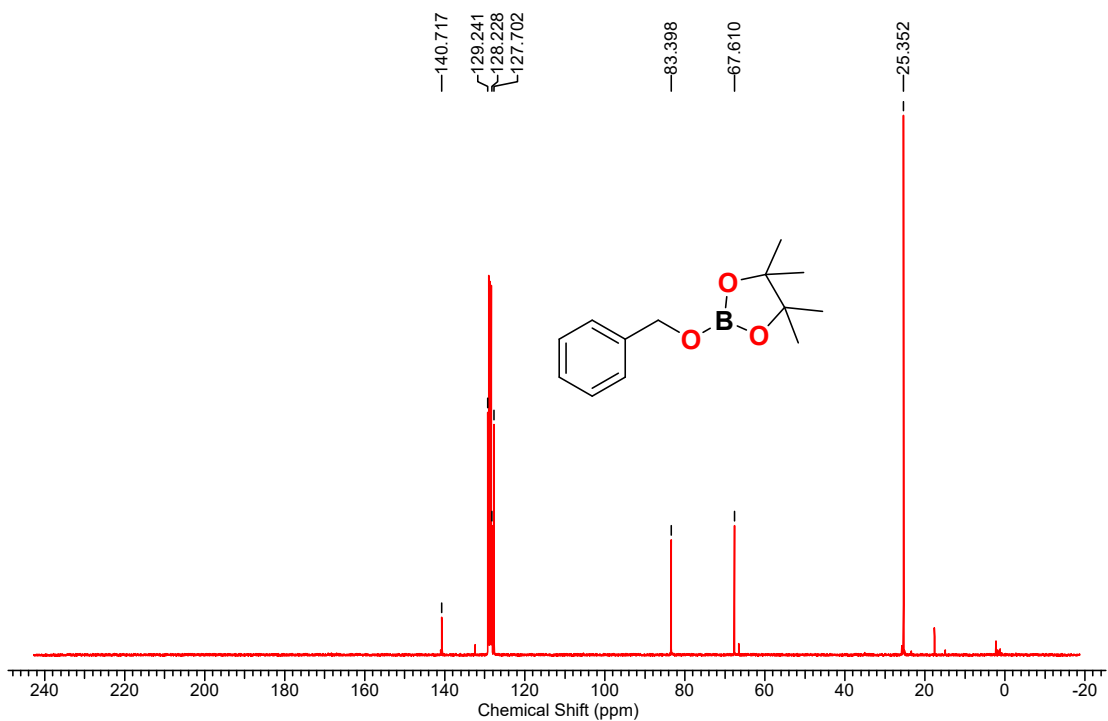

**Figure S60.**  $^{13}\text{C}$  NMR spectrum (100 MHz,  $25^\circ\text{C}$ ,  $\text{C}_6\text{D}_6$ ) of compound 2 x **3a**.

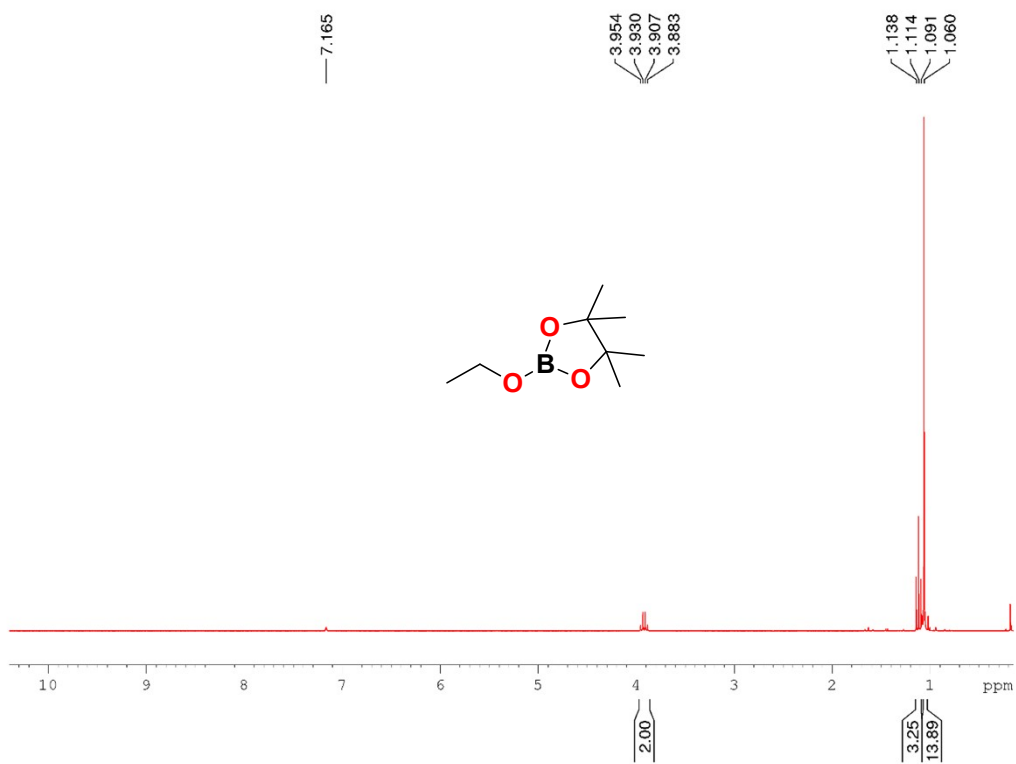

**Figure S61.**  $^1\text{H}$  NMR spectrum (400 MHz,  $25^\circ\text{C}$ ,  $\text{C}_6\text{D}_6$ ) of compound 2 x **3r**.

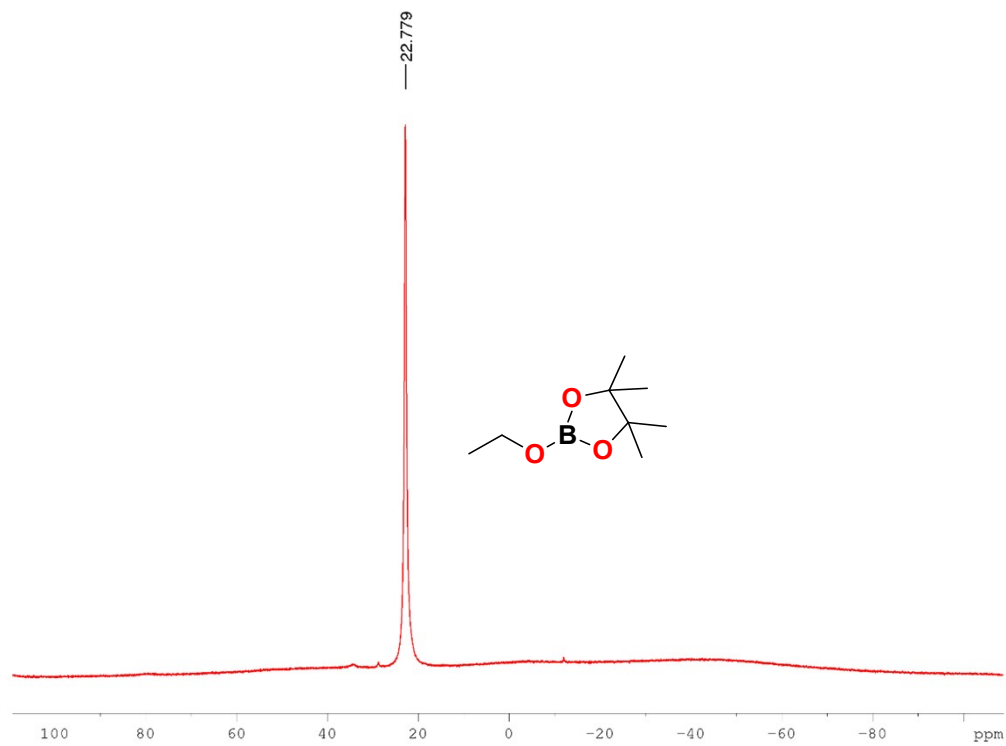

**Figure S62.**  $^{11}\text{B}$  NMR spectrum (128.4 MHz, 25°C,  $\text{C}_6\text{D}_6$ ) of compound **2 x 3r**.

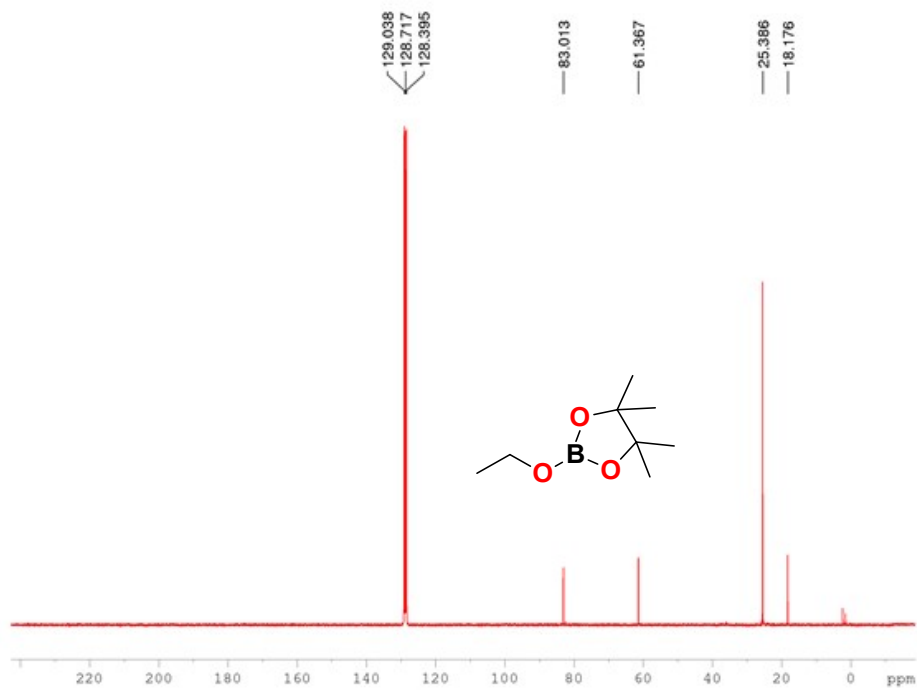

**Figure S63.**  $^{13}\text{C}$  NMR spectrum (100 MHz, 25°C,  $\text{C}_6\text{D}_6$ ) of compound **2 x 3r**.



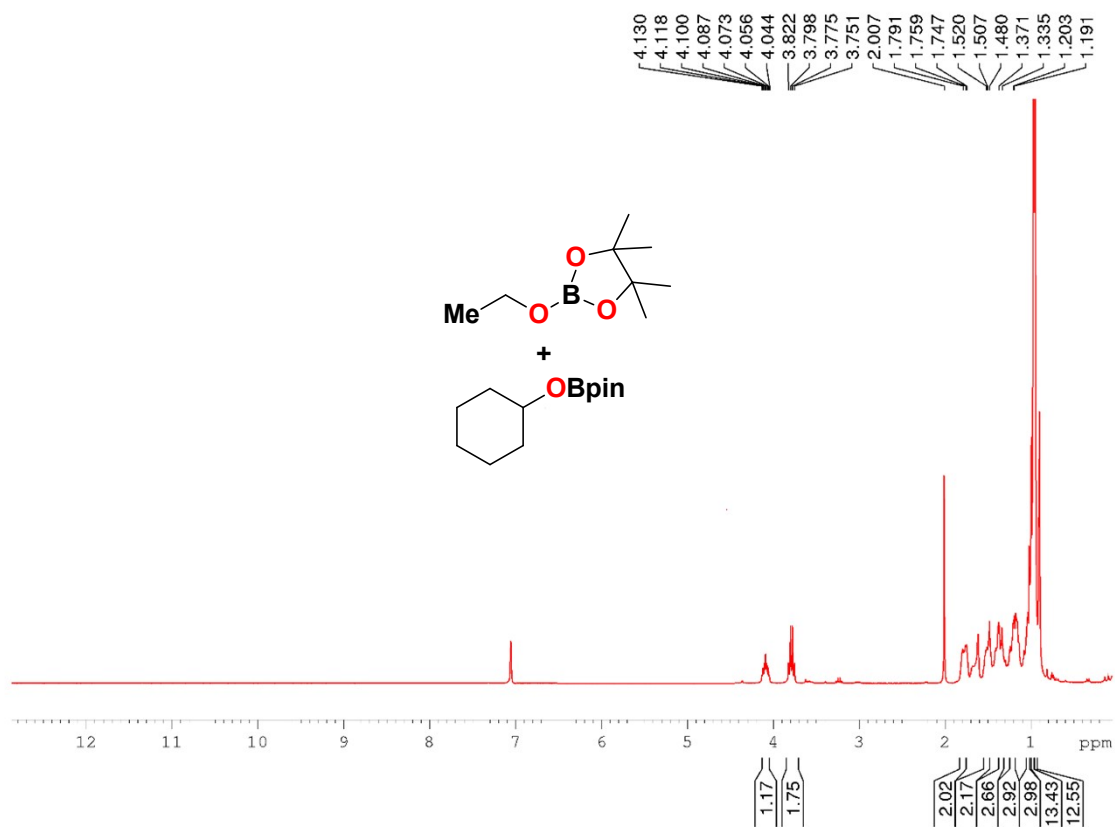

Figure S64. <sup>1</sup>H NMR spectrum (400 MHz, 25°C, C<sub>6</sub>D<sub>6</sub>) of compound 3r and 3s.

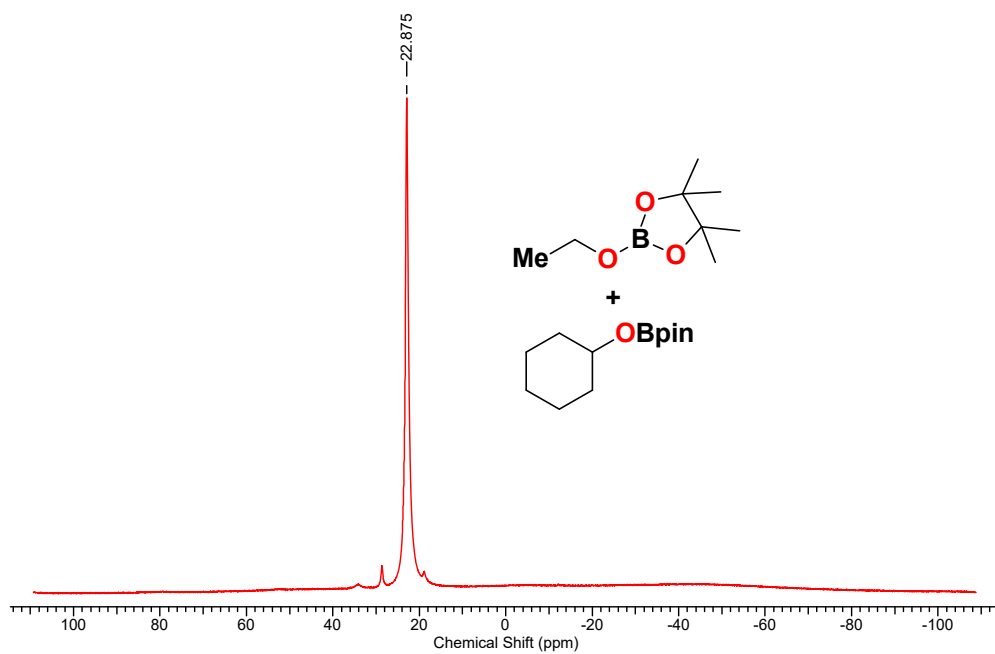

Figure S65. <sup>11</sup>B NMR spectrum (128.4 MHz, 25°C, C<sub>6</sub>D<sub>6</sub>) of compound 3r and 3s.

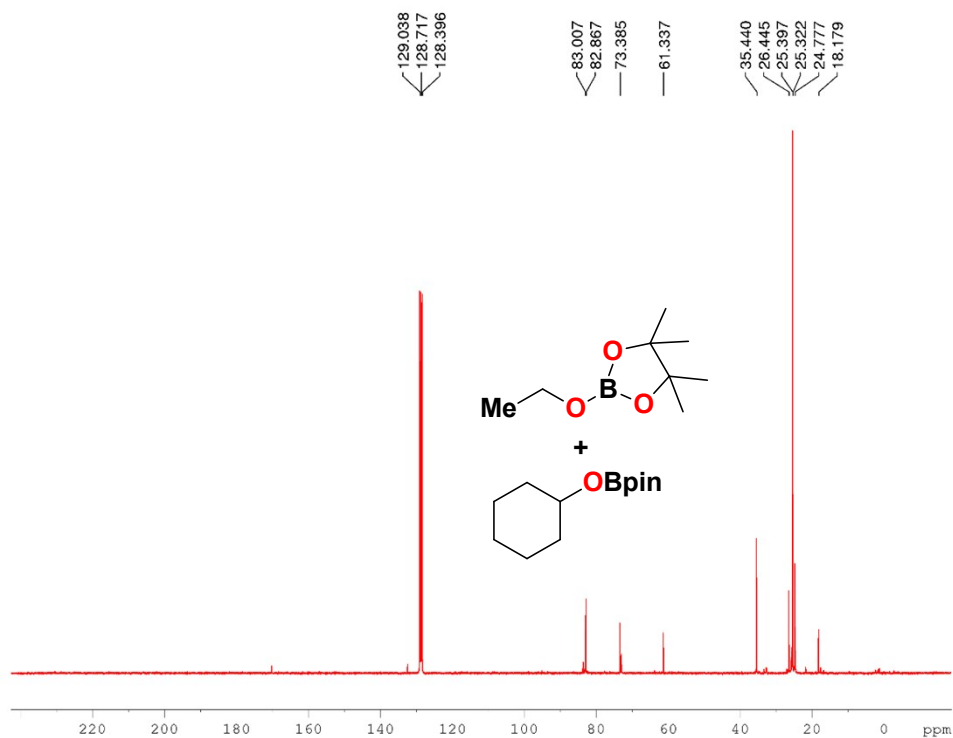

Figure S66.  $^{13}\text{C}$  NMR spectrum (100 MHz,  $25^\circ\text{C}$ ,  $\text{C}_6\text{D}_6$ ) of compound **3r** and **3s**.

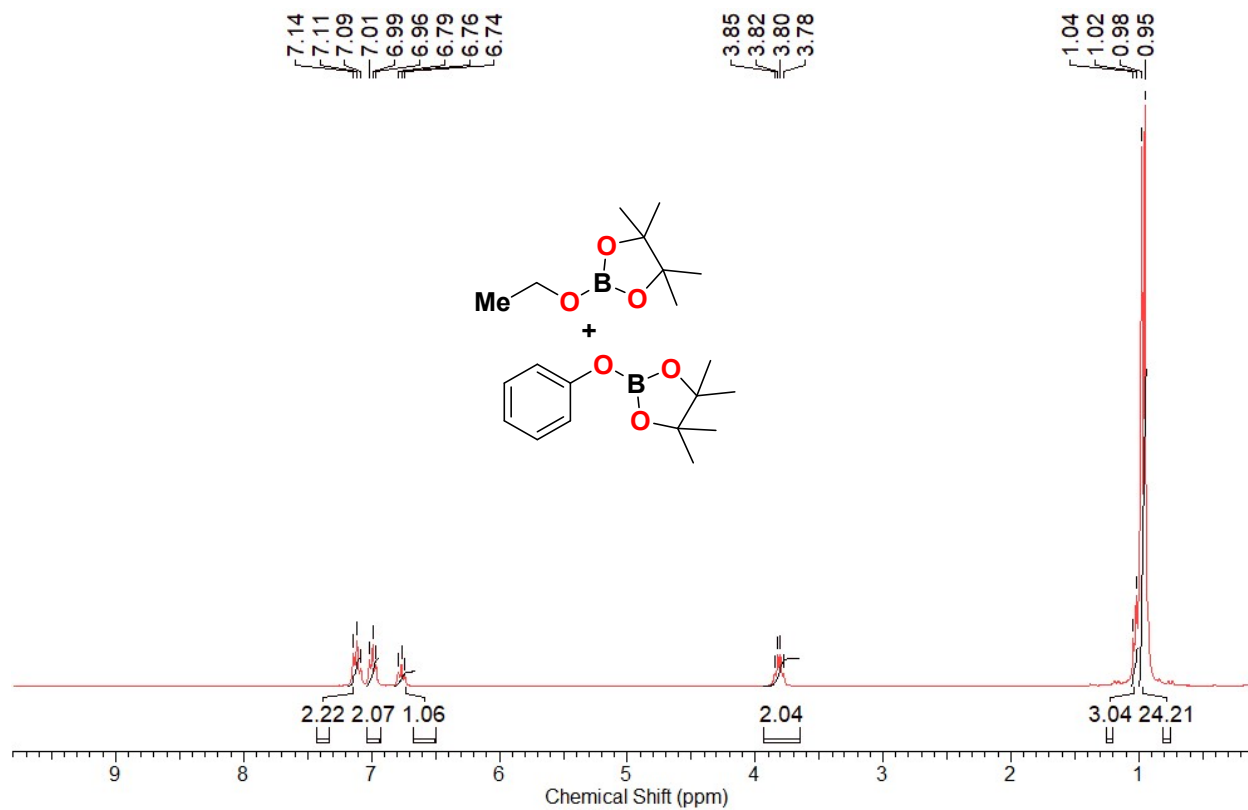

Figure S67.  $^1\text{H}$  NMR spectrum (400 MHz,  $25^\circ\text{C}$ ,  $\text{C}_6\text{D}_6$ ) of compound **3r** and **3t**.

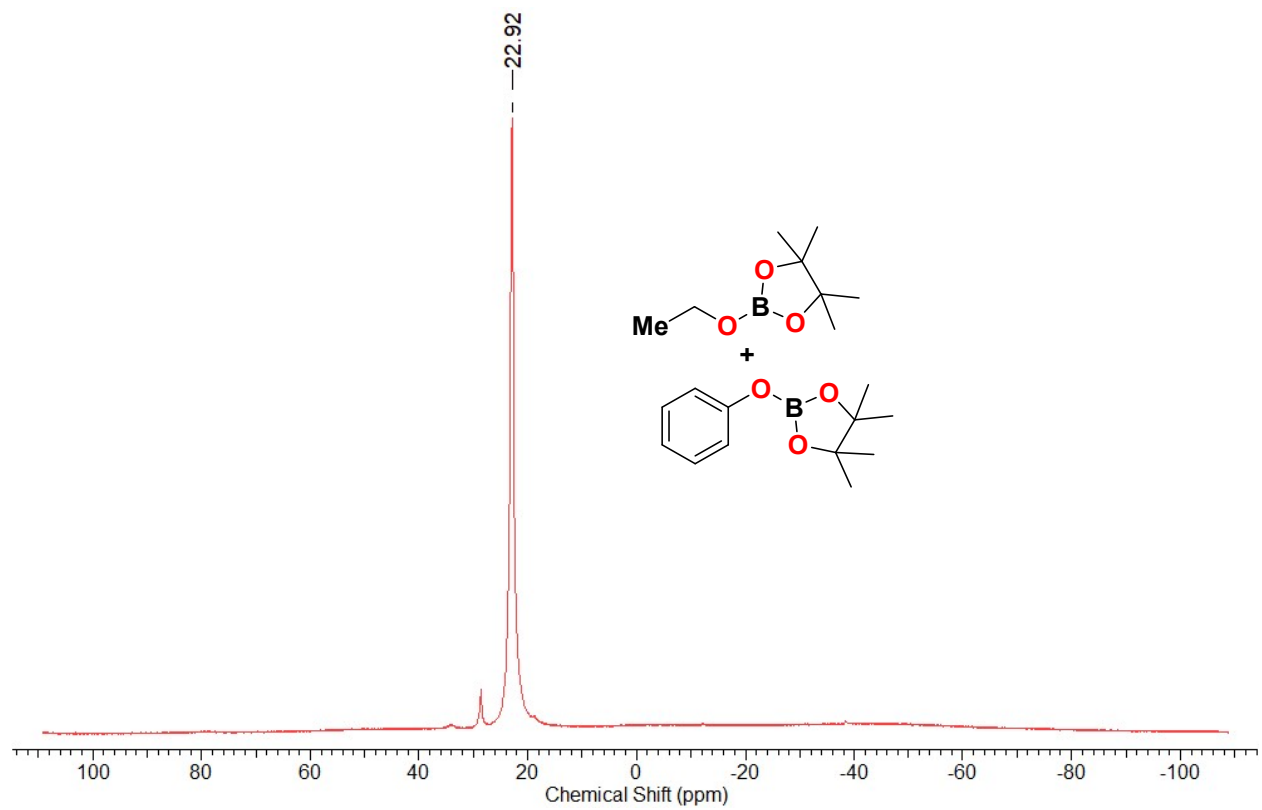

**Figure S68.**  $^{11}\text{B}$  NMR spectrum (128.4 MHz, 25°C,  $\text{C}_6\text{D}_6$ ) of compound **3r** and **3t**.

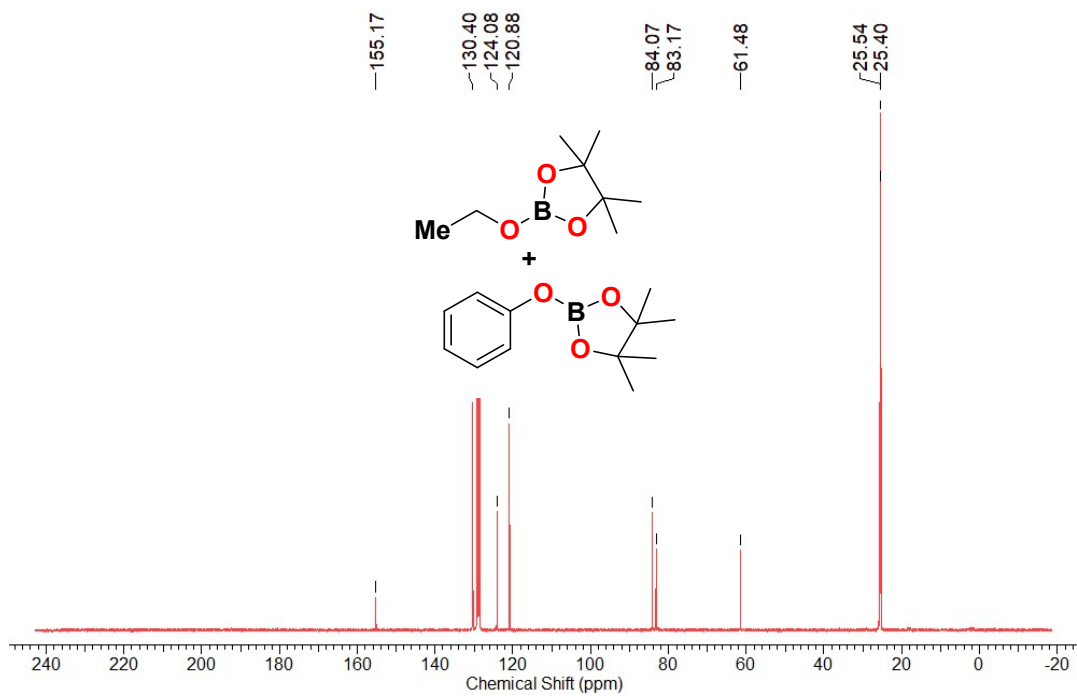

**Figure S69.**  $^{13}\text{C}$  NMR spectrum (100 MHz, 25°C,  $\text{C}_6\text{D}_6$ ) of compound **3r** and **3t**.

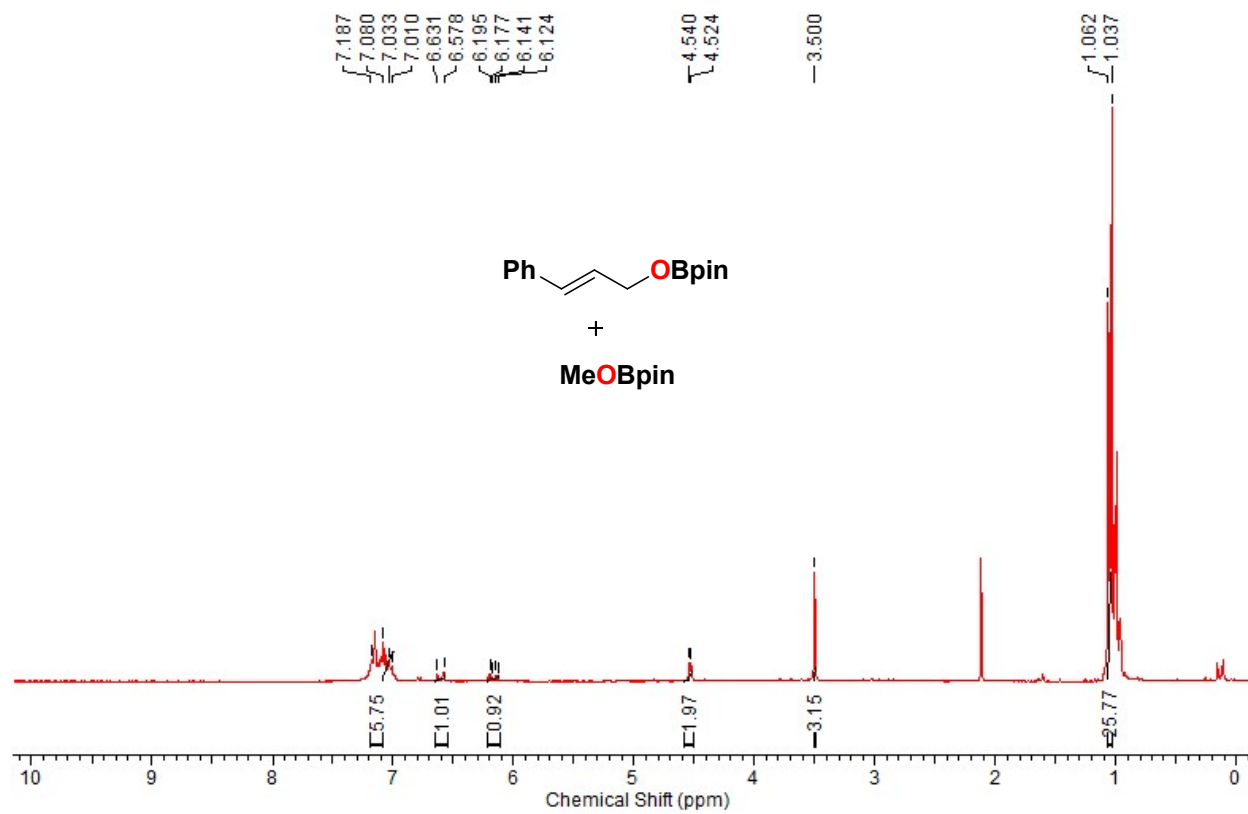

Figure S70.  $^1\text{H}$  NMR spectrum (400 MHz, 25°C,  $\text{C}_6\text{D}_6$ ) of compound **3u** and **3b**.

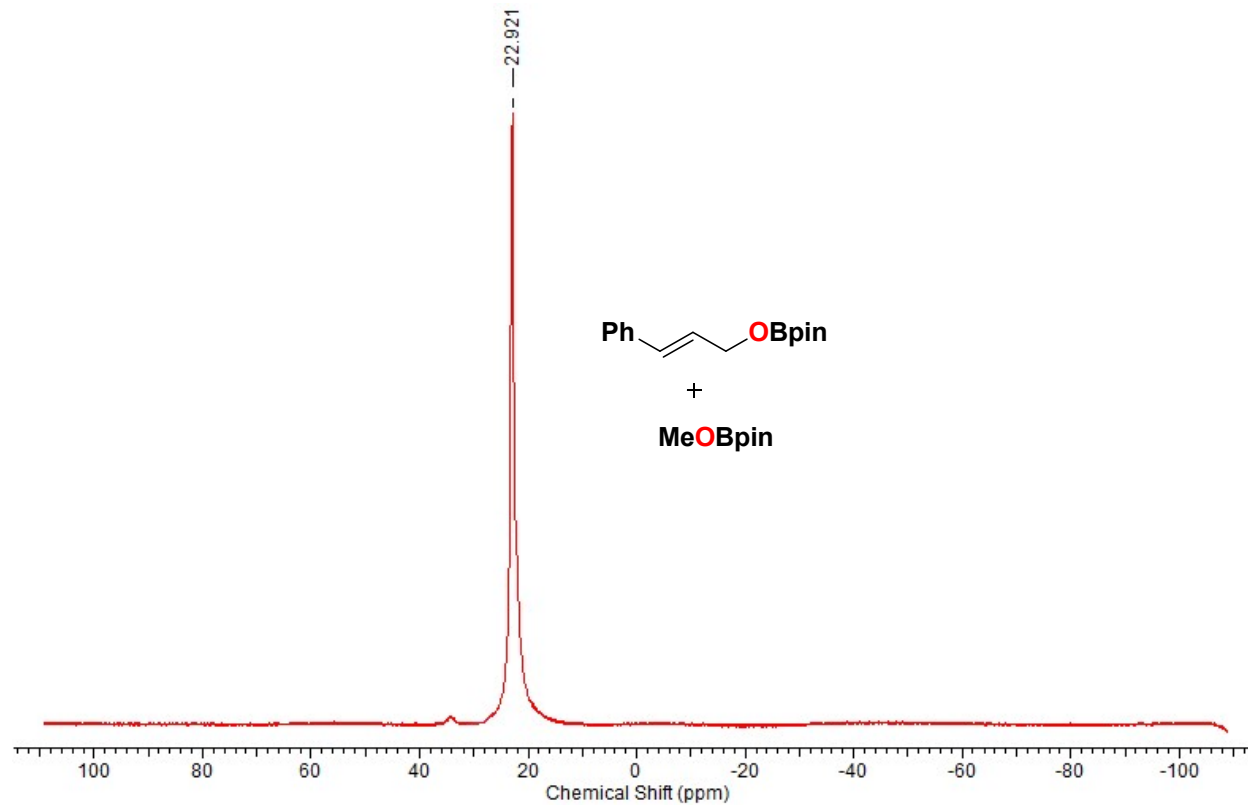

Figure S71.  $^{11}\text{B}$  NMR spectrum (128.4 MHz, 25°C,  $\text{C}_6\text{D}_6$ ) of compound **3u** and **3b**.

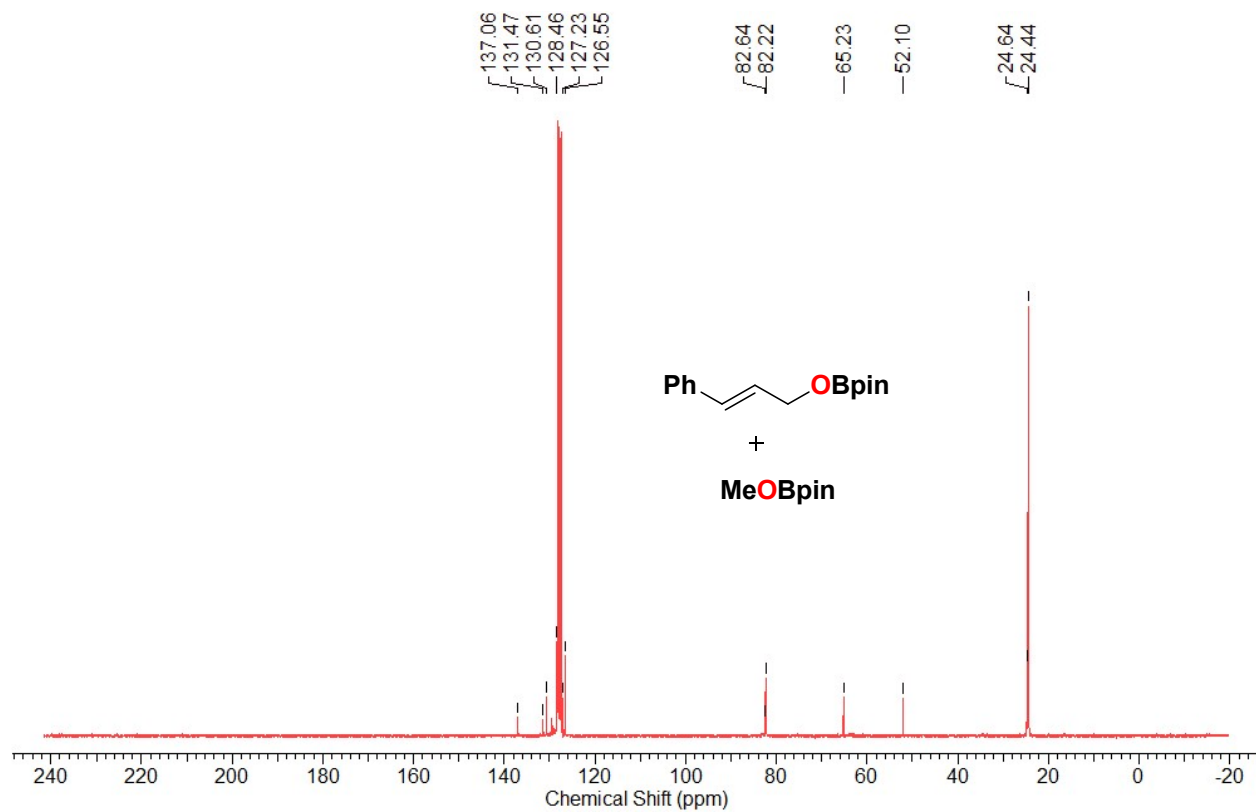

Figure S72.  $^{13}\text{C}$  NMR spectrum (100 MHz,  $25^\circ\text{C}$ ,  $\text{C}_6\text{D}_6$ ) of compound **3u** and **3b**.

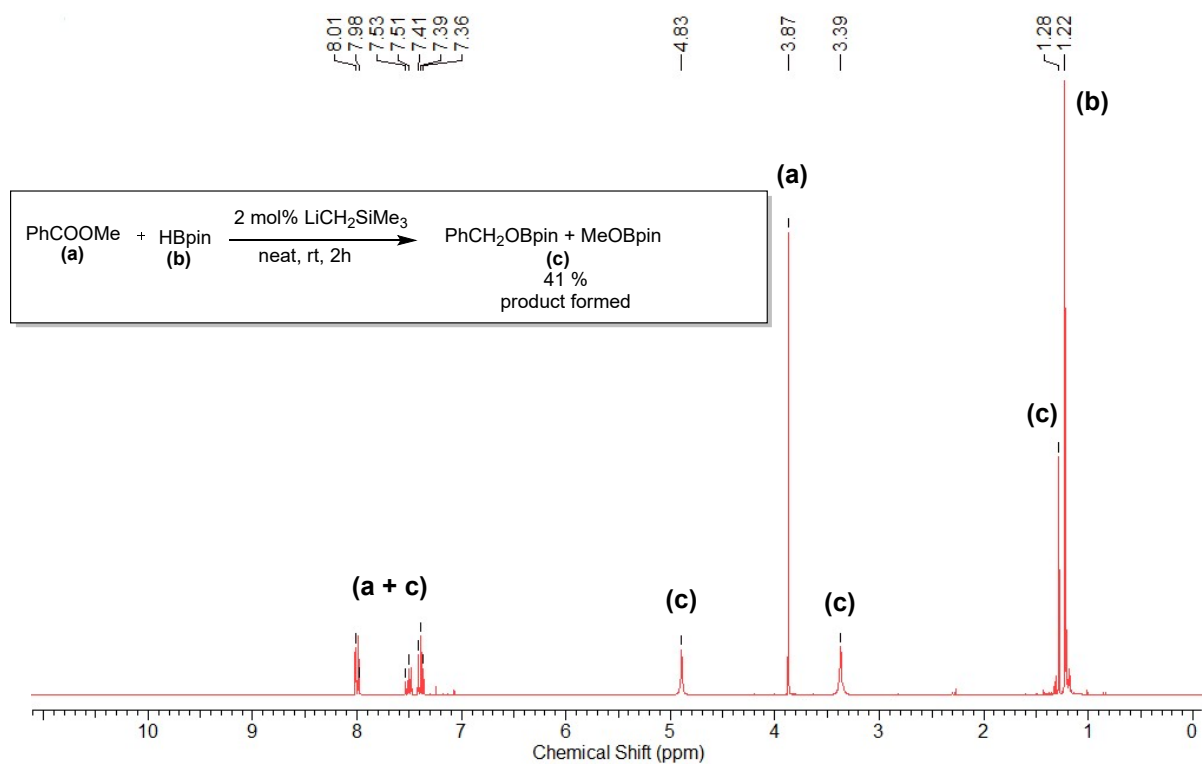

Figure S73.  $^1\text{H}$  NMR spectrum (400 MHz,  $25^\circ\text{C}$ ,  $\text{C}_6\text{D}_6$ ) of the reaction PhCOOMe with HBpin catalyzed by  $\text{LiCH}_2\text{SiMe}_3$ .

## (S6) Control Experiments:

### HBPin + Complex 1 (1:1)

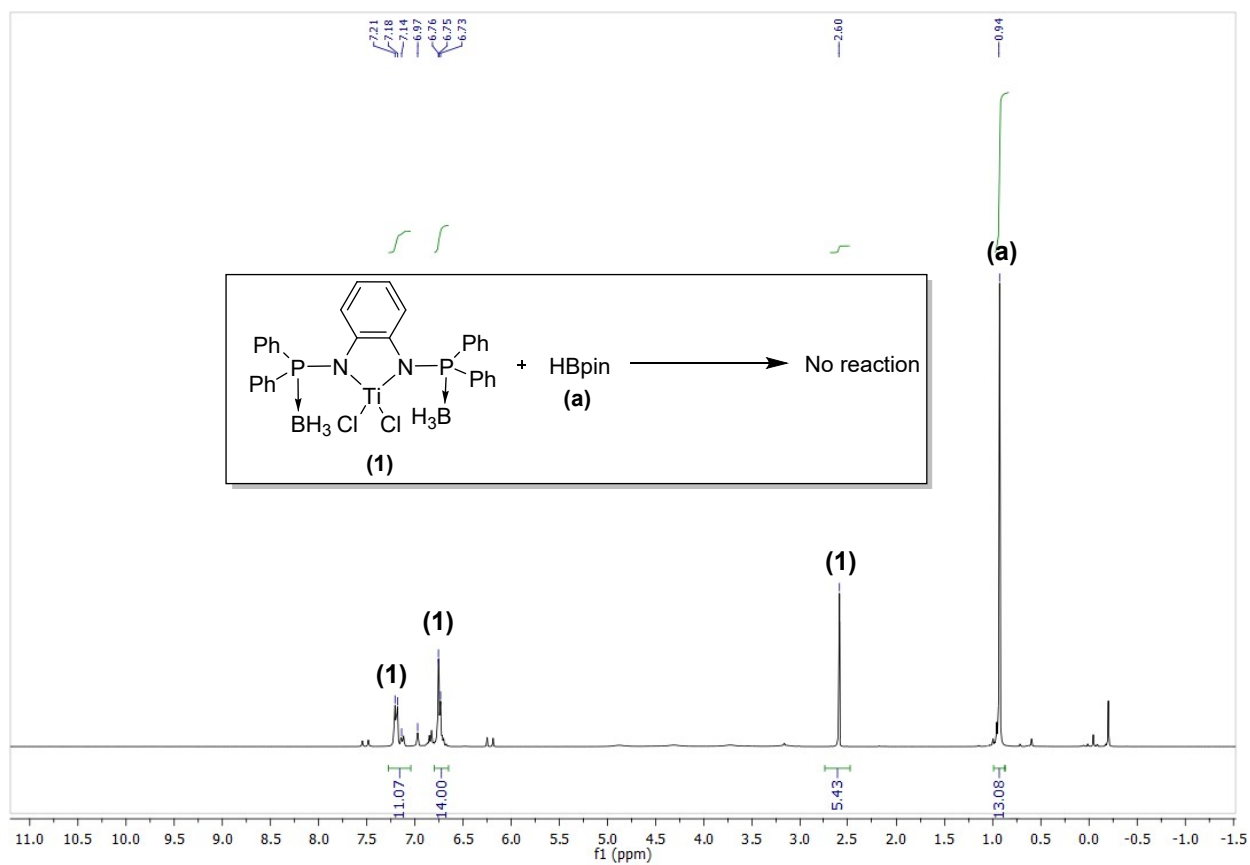

**Figure S74.**  $^1\text{H}$  NMR spectrum (400 MHz,  $25^\circ\text{C}$ ,  $\text{C}_6\text{D}_6$ ) of the reaction of complex **1** with HBpin (1:1).

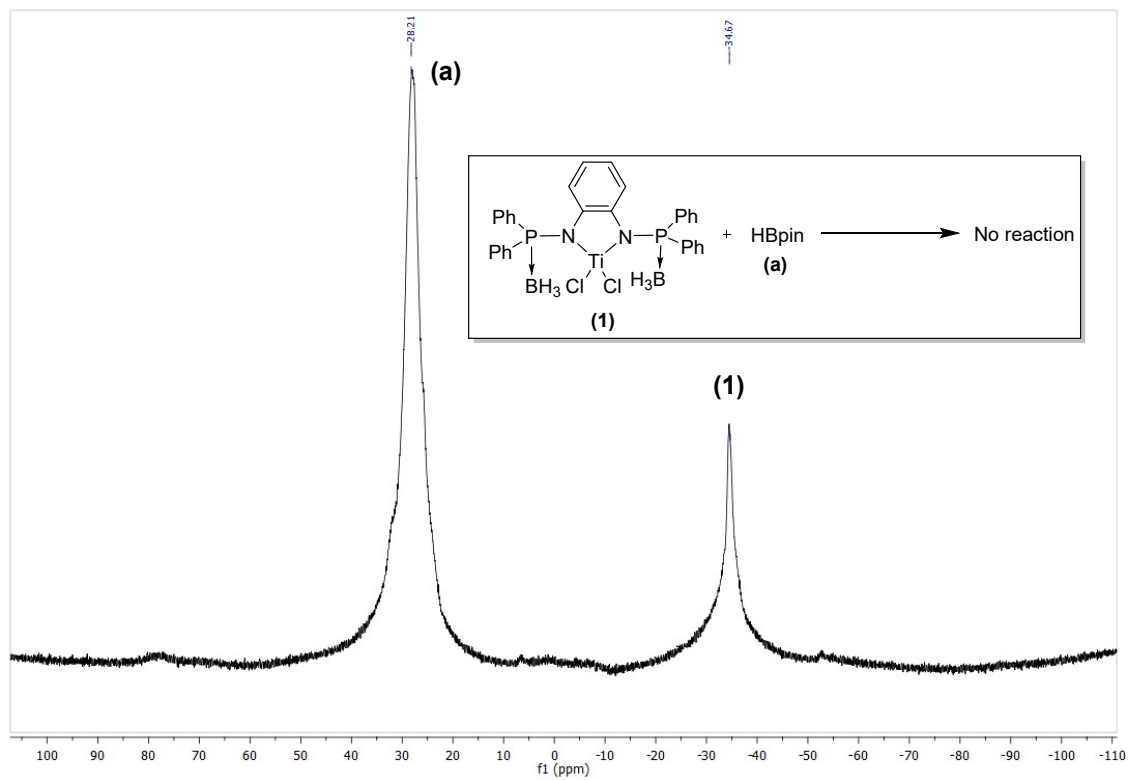

**Figure S75.**  $^{11}\text{B}\{^1\text{H}\}$  NMR spectrum (128.4 MHz, 25°C,  $\text{C}_6\text{D}_6$ ) of the reaction of complex **1** with HBpin (1:1).

### HBpin + Complex 2 (1:1)

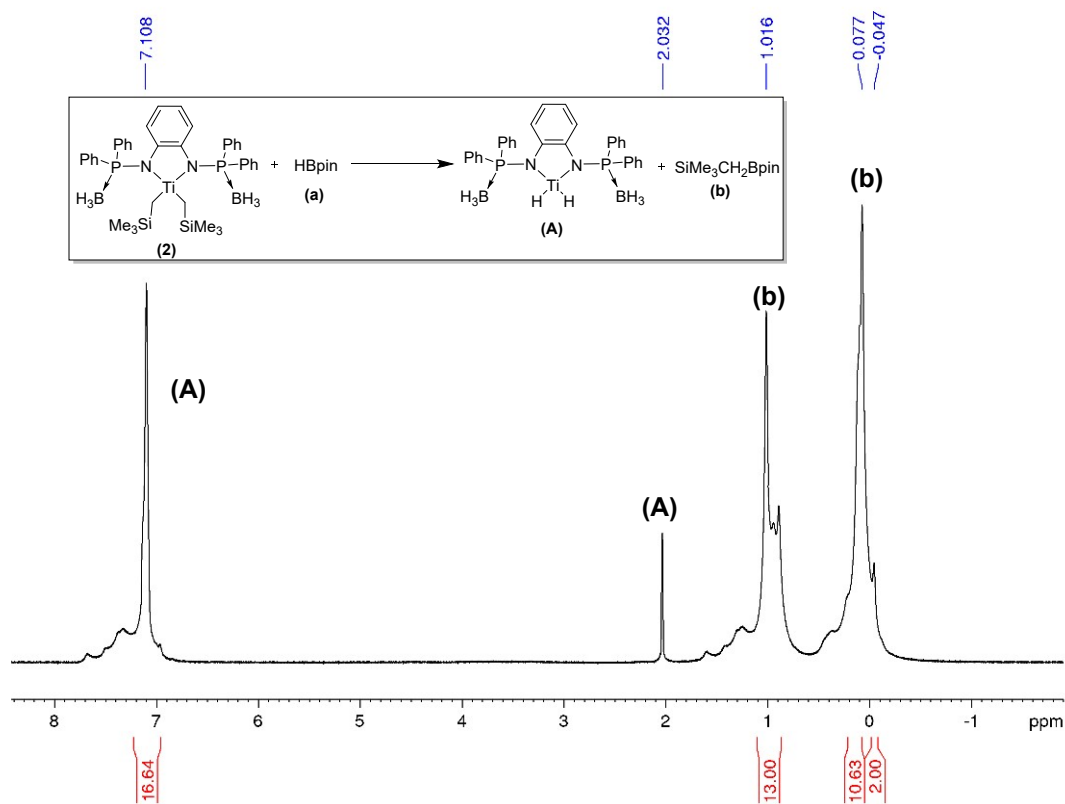

**Figure S76.**  $^1\text{H}$  NMR spectrum (400 MHz, 25°C,  $\text{C}_6\text{D}_6$ ) of the reaction of complex 2 with HBpin (1:1).

The NMR spectrum for the  $\text{TiH}_2\text{C}_6\text{H}_4(\text{NPPh}_2\text{BH}_3)_2$  complex and  $\text{CH}_2\text{SiMe}_3\text{Bpin}$  species (Figure S129-130). We failed to isolate a very clear NMR spectrum. The peaks that refer to Ti-H is not visible but the peaks that refer to  $\text{CH}_2\text{SiMe}_3\text{Bpin}$  species are visible in both spectrum.



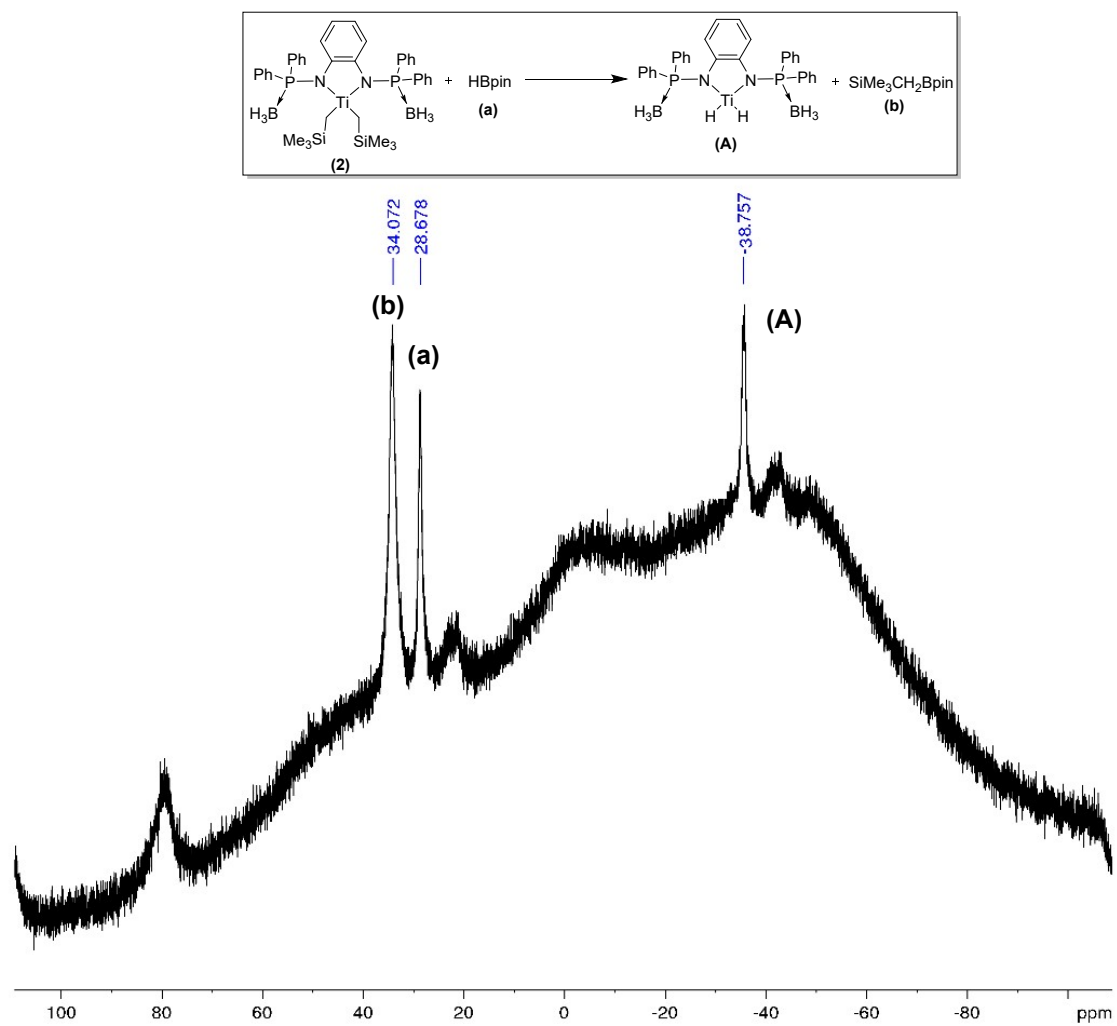

**Figure S77.**  $^{11}\text{B}\{^1\text{H}\}$  NMR spectrum (128.4 MHz, 25°C,  $\text{C}_6\text{D}_6$ ) of the reaction of complex **2** with HBpin (1:1).

### Complex 2 + Ester (1:1)

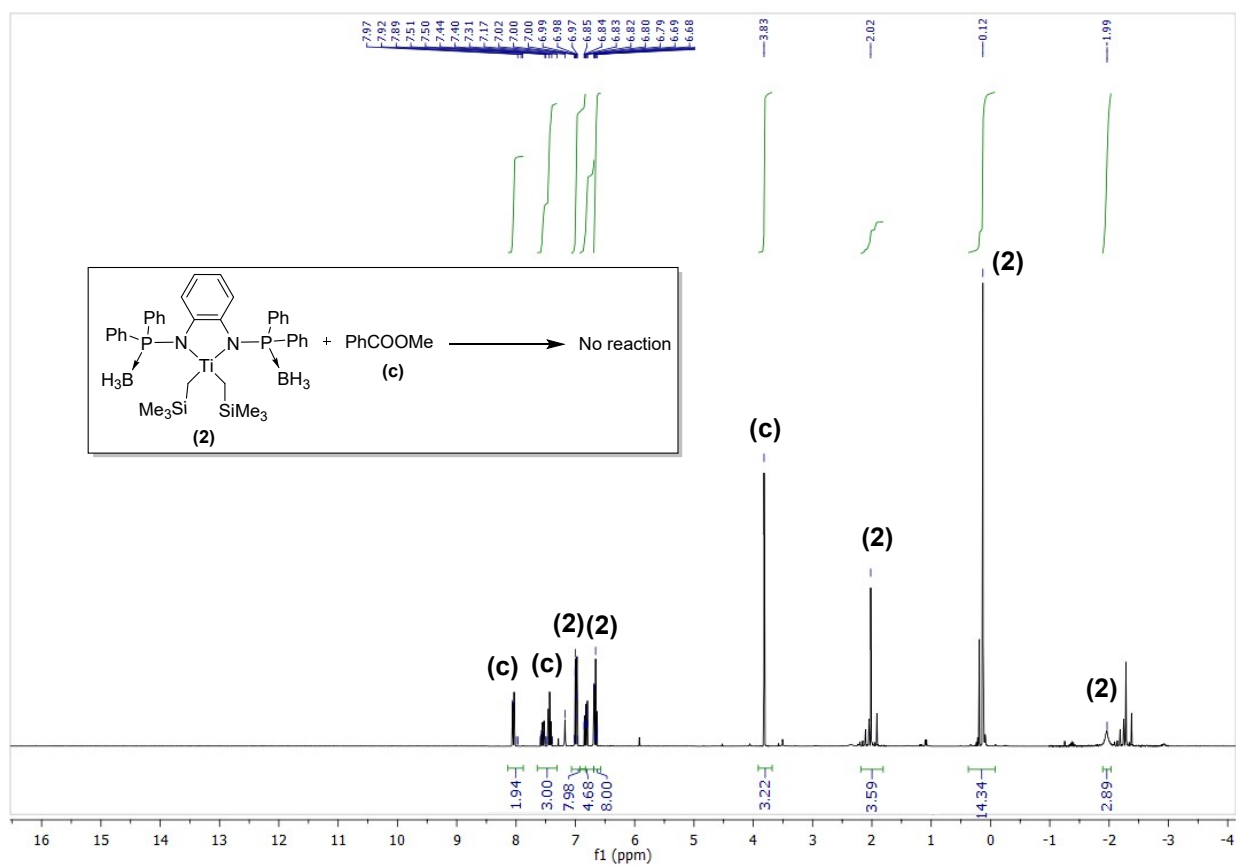

Figure S78.  $^1\text{H}$  NMR spectrum (400 MHz, 25°C,  $\text{C}_6\text{D}_6$ ) of the reaction of complex 2 with PhCOOMe (1:1).

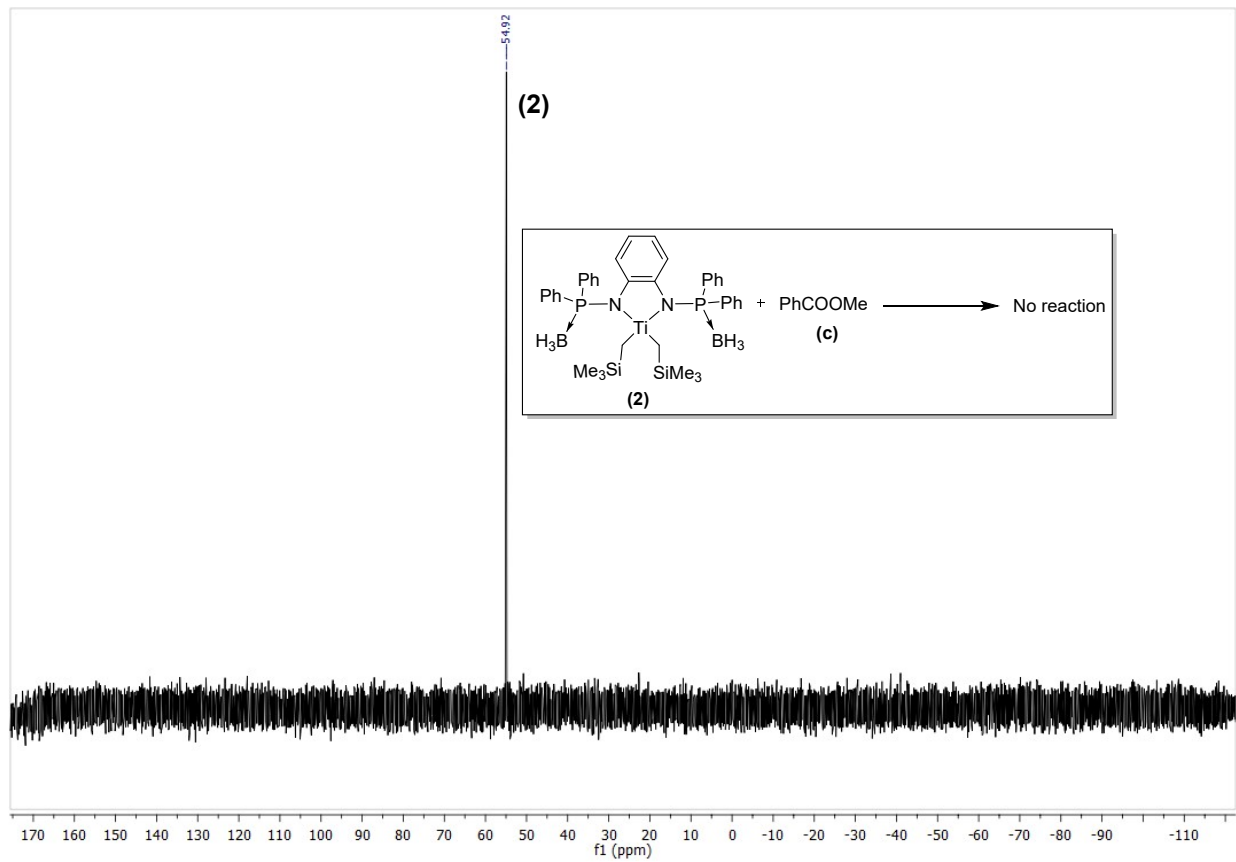

**Figure S79.**  $^{31}\text{P}\{^1\text{H}\}$  NMR spectrum (161.9 MHz, 25°C,  $\text{C}_6\text{D}_6$ ) of the reaction of complex **2** with  $\text{PhCOOMe}$  (1:1).

**Complex 2 + Ester (1:1)**

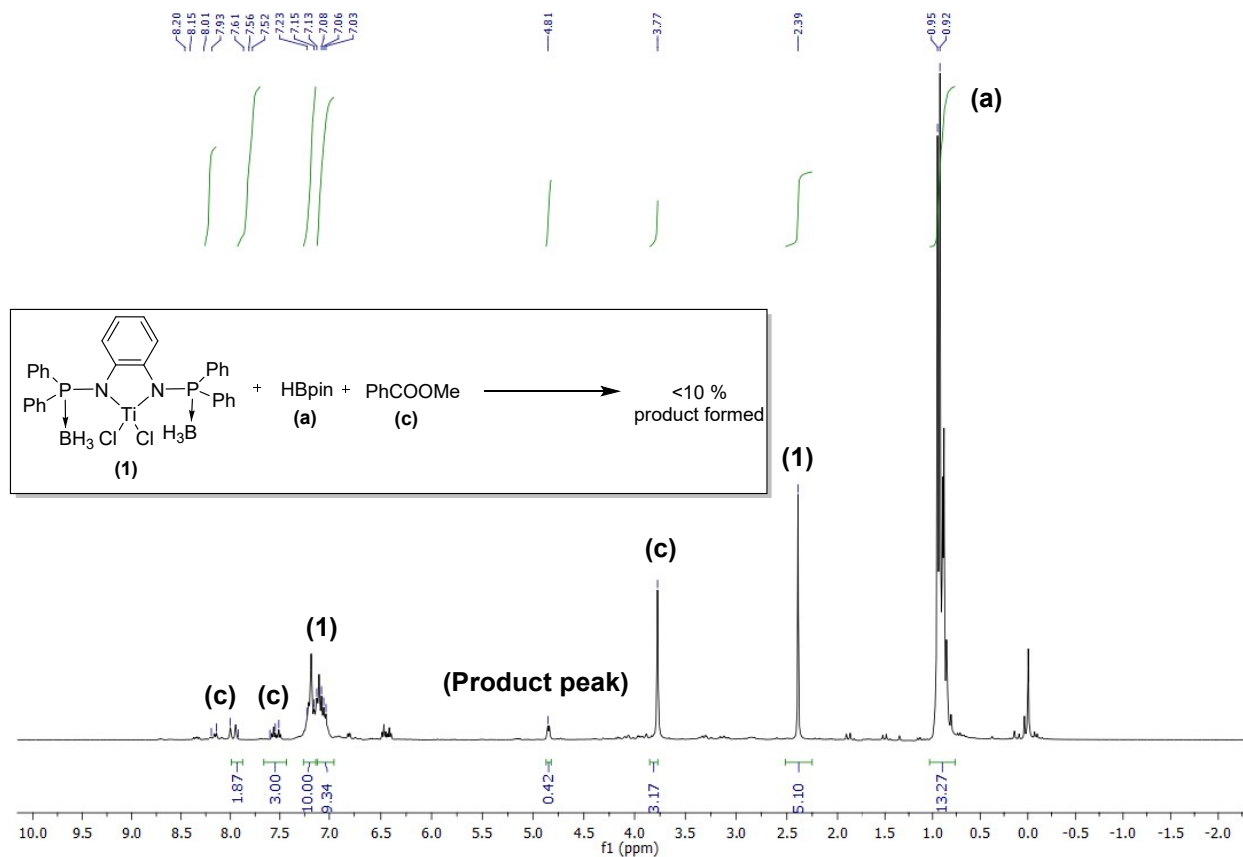

**Figure S80.** <sup>1</sup>H NMR spectrum (400 MHz, 25°C, C<sub>6</sub>D<sub>6</sub>) of the reaction of complex **1** with PhCOOMe and HBpin (1:1:1).

## (S7) Kinetic analysis details:

### Typical NMR-Scale Reaction for determining Kinetic Study by <sup>1</sup>H-NMR Arrays.

**Kinetic Analysis.** Kinetic analysis of the NMR-scale reactions described above was carried out by collecting multiple (>20) data points. The product concentration was measured from the area of the PhCH<sub>2</sub>OBpin peak formed with respect to their starting material peak standardized to the methyl peak area of the C<sub>6</sub>Me<sub>6</sub> internal standard. The order of the catalyst and each substrate was determined from the linearity of plots of [product] vs. time (zeroth order), ln[product] vs. time (first-order), and [product]<sup>-1</sup> vs. time (second-order) having R<sup>2</sup> value close towards 1.

### [Catalyst] rate order assessment

In a glove box, the respective amount of complex **2** (0.010, 0.015, 0.02, 0.025, 0.03 M), PhCOOMe (0.060g, 0.5 mmol) and HBpin (0.128 g, 1.0 mmol), and the internal standard, hexamethylbenzene (8 mg, 0.05 M), was added in a vial and after that C<sub>6</sub>D<sub>6</sub> (1 mL) was added to these reaction mixture. From this stock solution finally, 0.5 mL aliquot were taken out and it was added to a rubber septum-sealed NMR tube, wrapped with parafilm, and removed from the

box. The solution was set in the NMR tube at 25 °C. After that, the tube was shaken and reinserted into the instrument again and scanning was begun. Single (<sup>1</sup>H NMR) scans were collected at regular intervals.

Varying concentration of catalyst (10–30 mM), keeping HBPin (1.0 M) and methylbenzoate (0.5 M) concentration constant, which follows first-order dependence with respect to [catalyst] (Figure S75–S76).

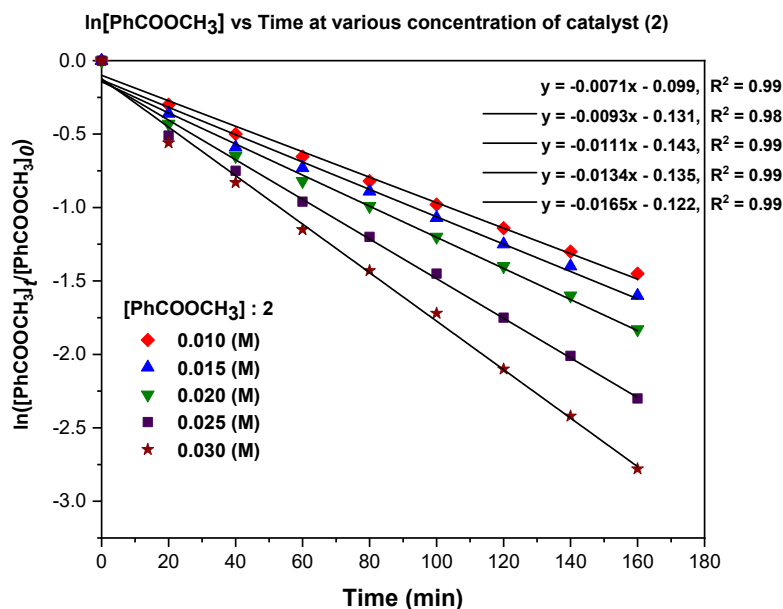

**Figure S81.** First order kinetic plots for ester hydroboration reaction in C<sub>6</sub>D<sub>6</sub> (1 mL) with different concentrations of [(CH<sub>2</sub>SiMe<sub>3</sub>)<sub>2</sub>Ti{Ph<sub>2</sub>P(BH<sub>3</sub>)N}<sub>2</sub>C<sub>6</sub>H<sub>4</sub>] (**2**) at 25 °C. Reaction conditions: [HBPin] = 1.0 M and [PhCOOCH<sub>3</sub>] = 0.5 M, [(CH<sub>2</sub>SiMe<sub>3</sub>)<sub>2</sub>Ti{Ph<sub>2</sub>P(BH<sub>3</sub>)N}<sub>2</sub>C<sub>6</sub>H<sub>4</sub>] = (10–30 mM) in C<sub>6</sub>D<sub>6</sub> (total volume 1 mL).

**Table S2.** Data for kinetic plot of *k*<sub>obs</sub> (obtained from first order kinetics plots) vs [(CH<sub>2</sub>SiMe<sub>3</sub>)<sub>2</sub>Ti{Ph<sub>2</sub>P(BH<sub>3</sub>)N}<sub>2</sub>C<sub>6</sub>H<sub>4</sub>] for the ester hydroboration reaction of PhCOOCH<sub>3</sub> with HBPin in presence of catalyst (**2**). Reaction conditions: [HBPin] = 1.0 M and [PhCOOCH<sub>3</sub>] = 0.5 M, [(CH<sub>2</sub>SiMe<sub>3</sub>)<sub>2</sub>Ti{Ph<sub>2</sub>P(BH<sub>3</sub>)N}<sub>2</sub>C<sub>6</sub>H<sub>4</sub>] = (10–30 mM) in C<sub>6</sub>D<sub>6</sub> (1 mL).

| S.NO. | [ <b>2</b> ] | <i>k</i> <sub>obs</sub> (min <sup>-1</sup> ) |
|-------|--------------|----------------------------------------------|
| 1     | 0.010        | 0.007                                        |
| 2     | 0.015        | 0.009                                        |
| 3     | 0.02         | 0.011                                        |
| 4     | 0.025        | 0.013                                        |
| 5     | 0.03         | 0.016                                        |

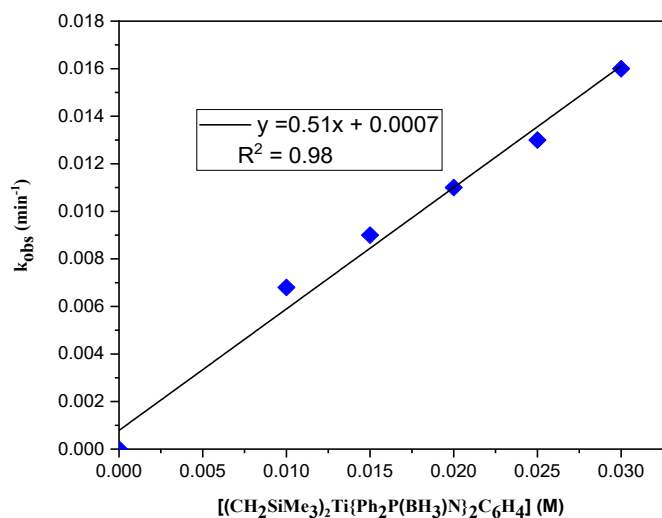

**Figure S82.** Kinetics plot of  $k_{\text{obs}}$  vs  $[(\text{CH}_2\text{SiMe}_3)_2\text{Ti}\{\text{Ph}_2\text{P}(\text{BH}_3)\text{N}\}_2\text{C}_6\text{H}_4]$  for ester hydroboration reaction in  $\text{C}_6\text{D}_6$  (1 mL) at 25 °C. Reaction conditions:  $[\text{HBpin}] = 1.0 \text{ M}$  and  $[\text{PhCOOCH}_3] = 0.5 \text{ M}$ ,  $[(\text{CH}_2\text{SiMe}_3)_2\text{Ti}\{\text{Ph}_2\text{P}(\text{BH}_3)\text{N}\}_2\text{C}_6\text{H}_4] = (10\text{--}30 \text{ mM})$  in  $\text{C}_6\text{D}_6$  (1.0 mL). The order of catalyst = 1.

#### [Ester] rate order assessment

Varying concentration of methylbenzoate (1.0–5.0 M), keeping HBpin (1.0 M) and catalyst (15 mM) concentration constant, which follows zero-order dependence with respect to  $[\text{PhCOOCH}_3]$  (Figure S77–S78).

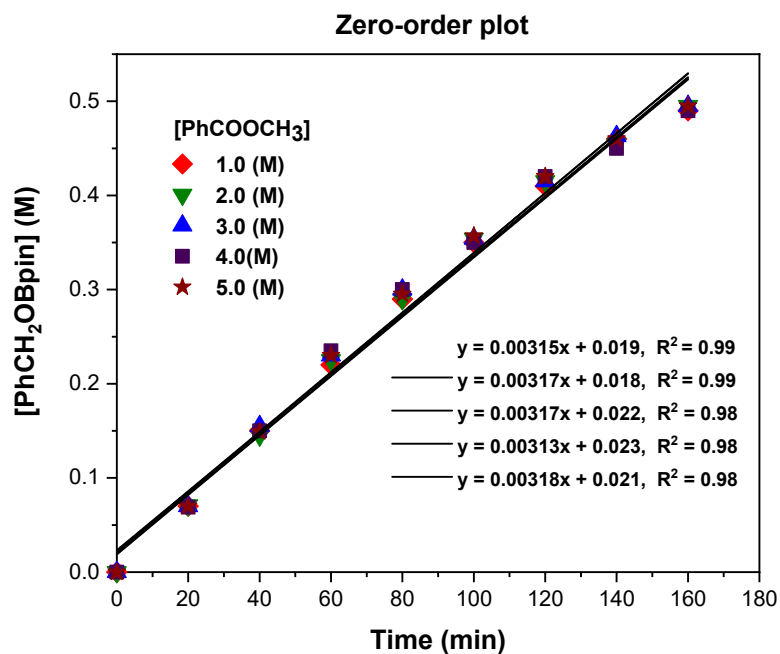

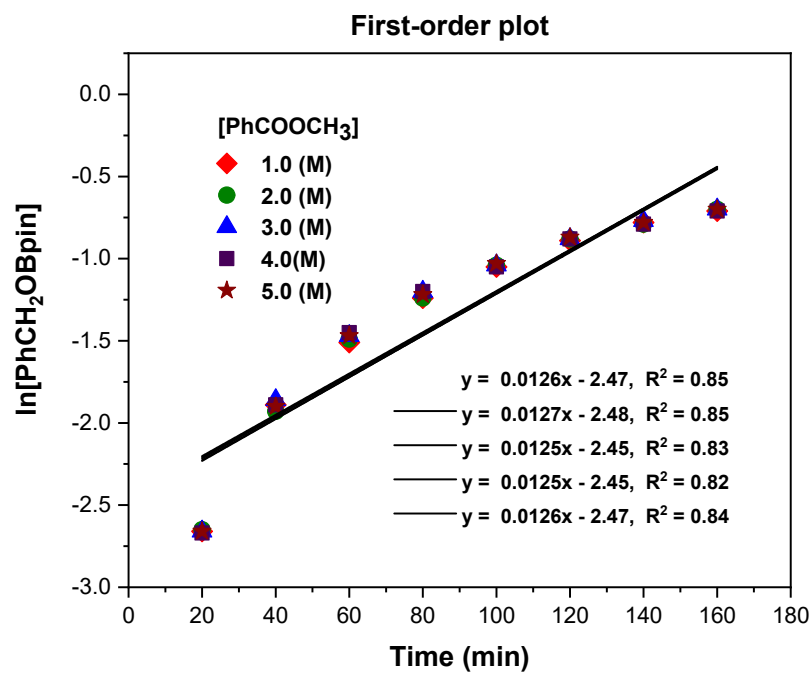

**Figure S83.** Different order kinetics plots for ester hydroboration reaction in  $C_6D_6$  (1 mL) at 25 °C. Reaction conditions:  $[HBPin] = 1.0$  M and  $[PhCOOCH_3] = (1.0-5.0)$  M,  $[(CH_2SiMe_3)_2Ti\{Ph_2P(BH_3)N\}_2C_6H_4] = 15$  mM in  $C_6D_6$  (1.0 mL). Only the zeroth-order plots are linear with  $R^2$  value close to 1 while the other two plots are nonlinear.

**Table S3.** Data for kinetic plot of  $k_{\text{obs}}$  vs  $[\text{PhCOOCH}_3]$  (obtained from zero order kinetics plots) for the ester hydroboration reaction of  $\text{PhCOOCH}_3$  with HBPin in presence of catalyst **2**. Reaction conditions:  $[(\text{CH}_2\text{SiMe}_3)_2\text{Ti}\{\text{Ph}_2\text{P}(\text{BH}_3)\text{N}\}_2\text{C}_6\text{H}_4] = 15 \text{ mM}$ ,  $[\text{HBpin}] = 1.0 \text{ M}$  and  $[\text{PhCOOCH}_3] = (1.0\text{--}5.0 \text{ M})$  in  $\text{C}_6\text{D}_6$  (1.0 mL).

| S.NO. | $[\text{PhCOOCH}_3]$ | $k_{\text{obs}}$ (Mmin <sup>-1</sup> ) |
|-------|----------------------|----------------------------------------|
| 1     | 1.0                  | 0.00315                                |
| 2     | 2.0                  | 0.00317                                |
| 3     | 3.0                  | 0.00317                                |
| 4     | 4.0                  | 0.00313                                |
| 5     | 5.0                  | 0.00318                                |

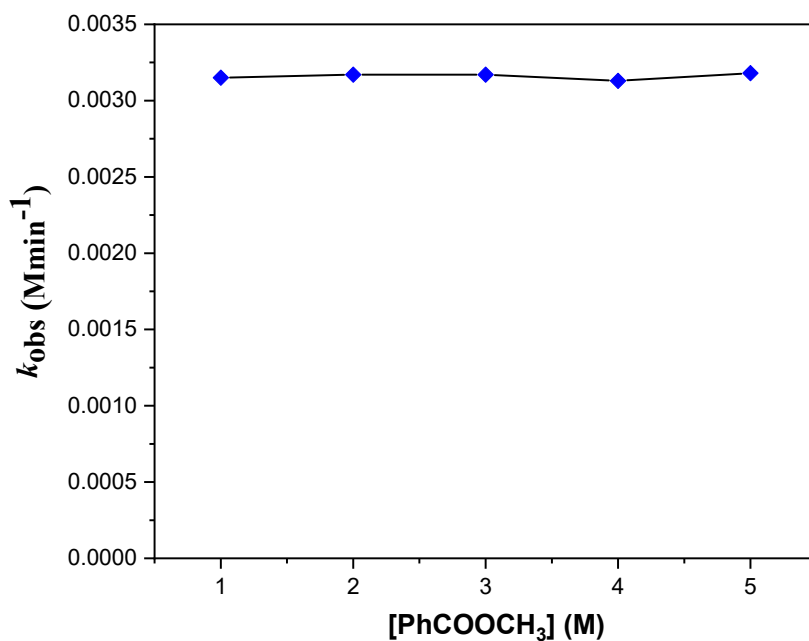

**Figure S84.** Kinetics plot of  $k_{\text{obs}}$  vs  $[\text{PhCOOCH}_3]$  for ester hydroboration reaction in  $\text{C}_6\text{D}_6$  (1 mL) at 25 °C. Reaction conditions:  $[\text{HBpin}] = 1.0 \text{ M}$  and  $[\text{PhCOOCH}_3] = (1.0\text{--}5.0 \text{ M})$ ,  $[(\text{CH}_2\text{SiMe}_3)_2\text{Ti}\{\text{Ph}_2\text{P}(\text{BH}_3)\text{N}\}_2\text{C}_6\text{H}_4] = 15 \text{ mM}$  in  $\text{C}_6\text{D}_6$  (1.0 mL). The order of  $\text{PhCOOCH}_3 = 0$  (slope = 0.0002  $\approx$  0).



## [HBpin] rate order assessment

Varying concentration of HBpin (2.0–7.0 M), keeping methylbenzoate (0.5 M) and catalyst (15 mM) concentration constant, which follows zero-order dependence with respect to [HBpin] (Figure S79–S80).

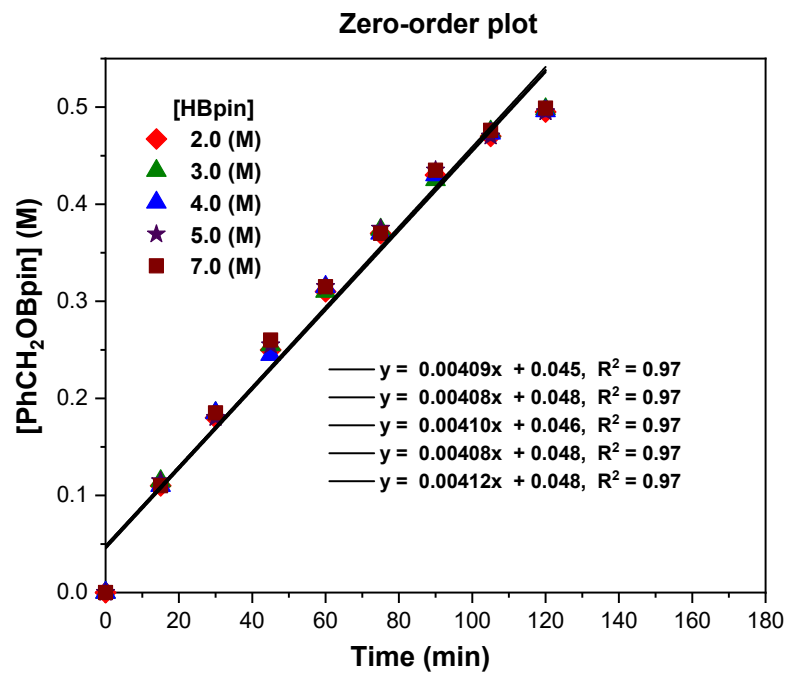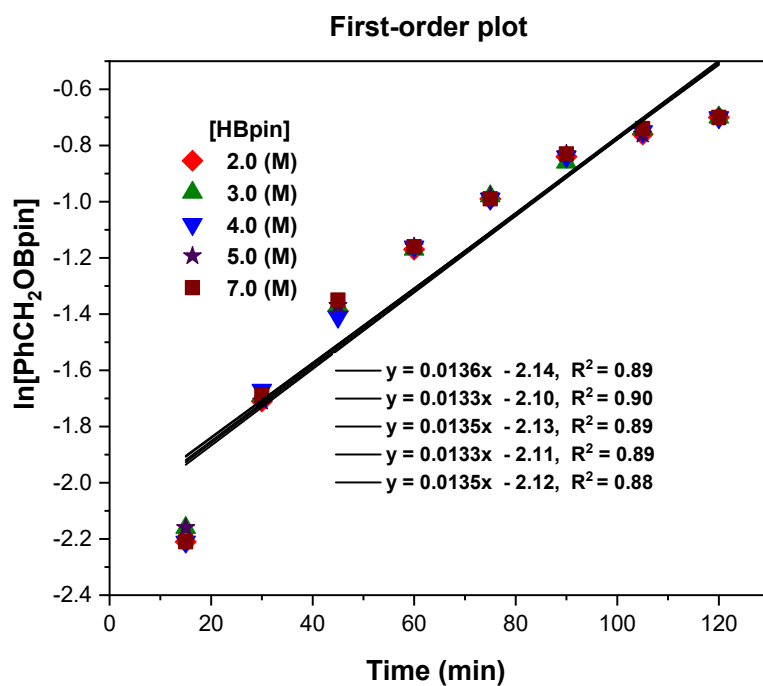

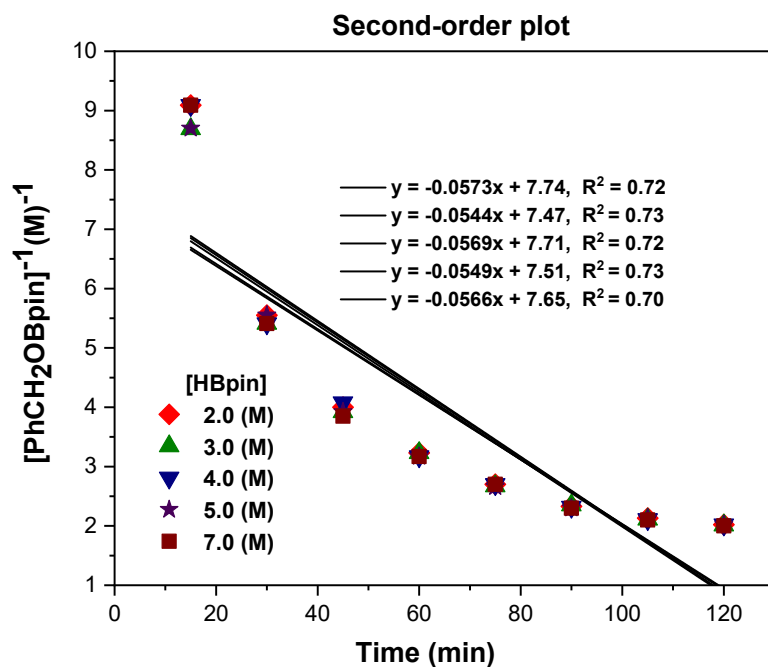

**Figure S85.** Different order kinetics plots for ester hydroboration reaction in  $C_6D_6$  (1 mL) at 25 °C. Reaction conditions:  $[HBpin] = (2.0-7.0)$  M and  $[PhCOOCH_3] = 0.5$  M,  $[(CH_2SiMe_3)_2Ti\{Ph_2P(BH_3)N\}_2C_6H_4] = 15$  mM in  $C_6D_6$  (1.0 mL). Only the zeroth-order plots are linear with  $R^2$  value close to 1 while the other two plots are nonlinear.

**Table S4.** Data for kinetic plot of  $k_{obs}$  vs  $[HBpin]$  (obtained from zero order kinetics plots) for the ester hydroboration reaction of  $PhCOOCH_3$  with  $HBpin$  in presence of catalyst **2**. Reaction conditions:  $[(CH_2SiMe_3)_2Ti\{Ph_2P(BH_3)N\}_2C_6H_4] = 15$  mM,  $[HBpin] = (2.0-7.0)$  M and  $[PhCOOCH_3] = 0.5$  M in  $C_6D_6$  (1.0 mL).

| S.NO. | $[HBpin]$ | $k_{obs} (Mmin)^{-1}$ |
|-------|-----------|-----------------------|
| 1     | 2.0       | 0.00409               |
| 2     | 3.0       | 0.00408               |
| 3     | 4.0       | 0.00410               |
| 4     | 5.0       | 0.00408               |
| 5     | 7.0       | 0.00412               |

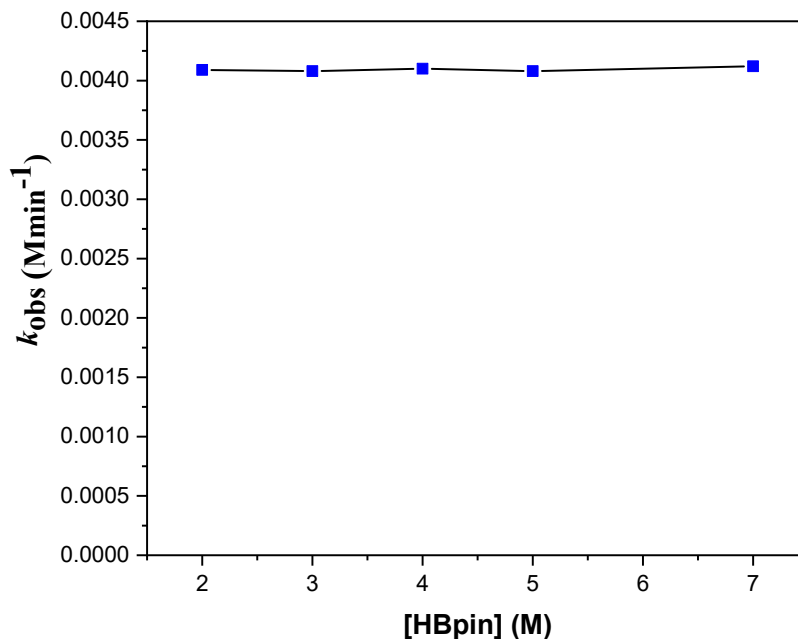

**Figure S86.** Kinetics plot of  $k_{obs}$  vs [HBpin] for ester hydroboration reaction in  $C_6D_6$  (1 mL) at 25 °C. Reaction conditions: [HBpin] = (2.0–7.0) M and [PhCOOCH<sub>3</sub>] = 0.5 M, [(CH<sub>2</sub>SiMe<sub>3</sub>)<sub>2</sub>Ti{Ph<sub>2</sub>P(BH<sub>3</sub>)N}<sub>2</sub>C<sub>6</sub>H<sub>4</sub>} = 15 mM in  $C_6D_6$  (1.0 mL). The order of PhCOOCH<sub>3</sub> = 0 (slope = 0.0009 ≈ 0).

**Eyring/Arrhenius plots:**

Temperature-dependent rate data were obtained *via* arrayed NMR measurement as described above. Temperatures were set on the NMR instrument using an external temperature controller and calibrated using ethylene glycol (>25 °C) or methanol (<25 °C) standards. Rates at each temperature were determined from the average of five trials.

These data were then plotted as  $1/T$  vs.  $\ln(k/T)$  from which the enthalpy and entropy of the transition state could be obtained using the Eyring equation (see eq. A).  $\Delta H^\ddagger$  is the negative slope times R and  $\Delta S^\ddagger$  is the intercept minus the natural log of  $k_b/h$  times R. (Figure 82)

$$\ln \frac{k}{T} = \frac{-\Delta H^\ddagger}{R} \cdot \frac{1}{T} + \ln \frac{k_B}{h} + \frac{\Delta S^\ddagger}{R} \text{ -----Eq (A)}$$

From a plot of  $1/T$  vs.  $\ln(k)$ , the activation energy can be obtained using the Arrhenius equation (eq. B).  $E_a$  is the negative slope times R. (Figure 83)

$$\ln k = -\frac{E_a}{RT} + \ln A \text{ -----Eq (B)}$$

The activation parameters for the Hydroboration of ester with Pinacolborane catalyzed by  $[(\text{CH}_2\text{SiMe}_3)_2\text{Ti}\{\text{Ph}_2\text{P}(\text{BH}_3)\text{N}\}_2\text{C}_6\text{H}_4]$  (**2**) in  $\text{C}_6\text{D}_6$  were found to be  $\Delta H^\ddagger$  2.52(1) kcal.mol<sup>-1</sup> and  $\Delta S^\ddagger$  -40.36 (3) cal/(mol.K),  $\Delta E_a$  = 3.3(1) kcal.mol<sup>-1</sup>. A  $\Delta G^\ddagger$  value of 14.55 kcal.mol<sup>-1</sup> was calculated for the Hydroboration of esters with Pinacolborane by the titanium alkyl catalyst (**2**) at 25 °C.

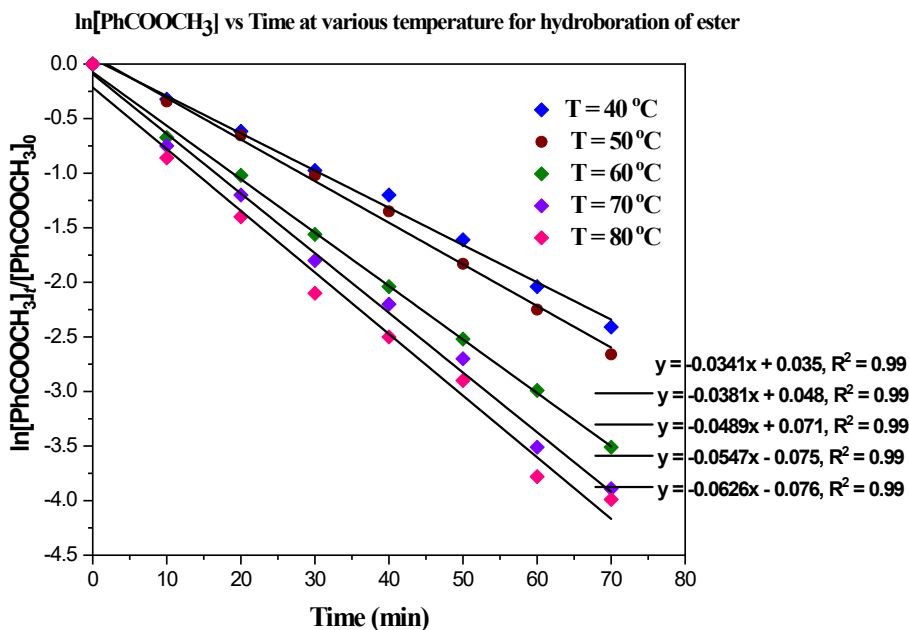

**Figure S87.** First order kinetic plots for hydroboration reaction of  $\text{PhCOOCH}_3$  in  $\text{C}_6\text{D}_6$  (1 mL) at different temperatures using catalyst  $[(\text{CH}_2\text{SiMe}_3)_2\text{Ti}\{\text{Ph}_2\text{P}(\text{BH}_3)\text{N}\}_2\text{C}_6\text{H}_4]$  (**2**). Reaction conditions:  $[\text{HBPin}] = 1.0$  M and  $[\text{PhCOOCH}_3] = 0.5$  M,  $[(\text{CH}_2\text{SiMe}_3)_2\text{Ti}\{\text{Ph}_2\text{P}(\text{BH}_3)\text{N}\}_2\text{C}_6\text{H}_4] = 15$  mM in  $\text{C}_6\text{D}_6$  (1.0 mL).

**Table S5.** Data for Eyring and Arrhenius plots of  $\ln(k_{\text{obs}}/T)$  vs  $(1/T)$  and  $\ln(k_{\text{obs}})$  vs  $(1/T)$  catalyzed by  $[(\text{CH}_2\text{SiMe}_3)_2\text{Ti}\{\text{Ph}_2\text{P}(\text{BH}_3)\text{N}\}_2\text{C}_6\text{H}_4]$  (**2**) [Reaction conditions:  $[\text{HBPin}] = 1.0$  M and  $[\text{PhCOOCH}_3] = 0.5$  M,  $[(\text{CH}_2\text{SiMe}_3)_2\text{Ti}\{\text{Ph}_2\text{P}(\text{BH}_3)\text{N}\}_2\text{C}_6\text{H}_4] = 15$  mM in  $\text{C}_6\text{D}_6$  (1.0 mL)].

| S.NO. | T in K | (1/T) [K <sup>-1</sup> ] | $k_{\text{obs}}$ [min <sup>-1</sup> ] | $\ln k_{\text{obs}}$ | $\ln(k_{\text{obs}}/T)$ |
|-------|--------|--------------------------|---------------------------------------|----------------------|-------------------------|
| 1     | 303    | 0.0033                   | 0.0341(1)                             | -3.37                | -9.09                   |
| 2     | 313    | 0.00319                  | 0.0381(1)                             | -3.27                | -9.01                   |
| 3     | 323    | 0.0031                   | 0.0489(1)                             | -3.05                | -8.79                   |
| 4     | 328    | 0.003                    | 0.0547(2)                             | -2.91                | -8.69                   |
| 5     | 338    | 0.0029                   | 0.0626(3)                             | -2.77                | -8.59                   |

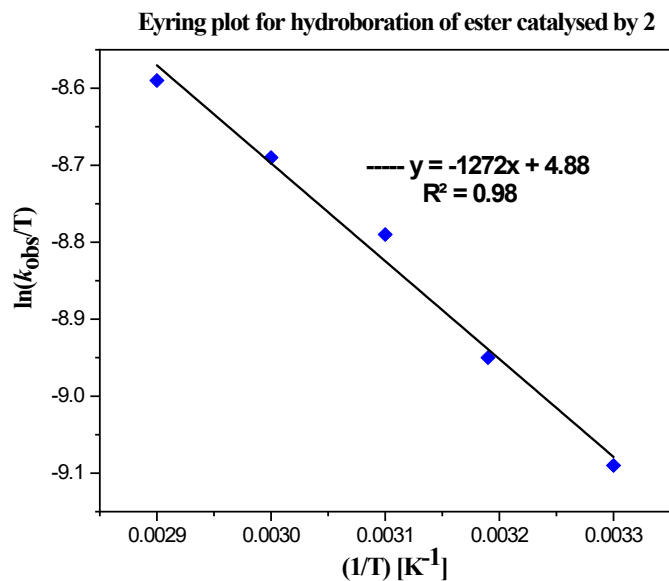

**Figure S88.** Eyring plot of  $\ln(k_{\text{obs}}/T)$  vs  $(1/T)$  for titanium alkyl (**2**) catalyzed hydroboration reaction of  $\text{PhCOOCH}_3$  in  $\text{C}_6\text{D}_6$  (1.0 mL) having  $\Delta H^\ddagger = 2.52(1)$  kcal mol<sup>-1</sup>  $\Delta S^\ddagger = -40.36$  (3) cal mol<sup>-1</sup>K<sup>-1</sup>. Reaction conditions:  $[\text{HBPin}] = 1.0$  M and  $[\text{PhCOOCH}_3] = 0.5$  M,  $[(\text{CH}_2\text{SiMe}_3)_2\text{Ti}\{\text{Ph}_2\text{P}(\text{BH}_3)\text{N}\}_2\text{C}_6\text{H}_4] = 15$  mM in  $\text{C}_6\text{D}_6$  (1.0 mL)

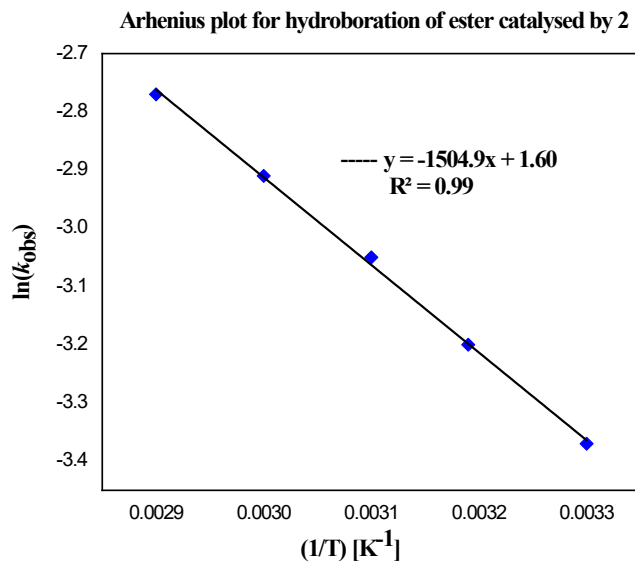

**Figure S89.** Arrhenius plot of  $\ln(k_{\text{obs}}/T)$  vs  $(1/T)$  for titanium alkyl (**2**) catalyzed hydroboration reaction of  $\text{PhCOOCH}_3$  in  $\text{C}_6\text{D}_6$  (0.4 mL) having  $E_a = 3.3(1)$  kcal mol<sup>-1</sup>. Reaction conditions:  $[\text{HBPin}] = 1.0$  M and  $[\text{PhCOOCH}_3] = 0.5$  M,  $[(\text{CH}_2\text{SiMe}_3)_2\text{Ti}\{\text{Ph}_2\text{P}(\text{BH}_3)\text{N}\}_2\text{C}_6\text{H}_4] = 15$  mM in  $\text{C}_6\text{D}_6$  (1.0 mL).

## (S8) Computational Method:

All calculations were performed using the ORCA quantum chemical program package<sup>[4]</sup>. Geometries were optimized with the GGA (generalized gradient approximation) density functional BP86<sup>[5-6]</sup> in conjunction with def2-SVP<sup>[7]</sup> basis sets. To accelerate the overall calculations, the RI<sup>[8-10]</sup> (resolution-of-identity) approximation was applied for the expensive integral calculations. Noncovalent interactions were accounted by using atom-pairwise dispersion corrections with Becke-Johnson (D3BJ) damping.<sup>[11]</sup> Subsequent numerical frequency calculations were undertaken for the optimized geometries to confirm that they correspond to stationary points featuring no imaginary frequencies. Gibbs free energies were calculated by single point calculations with BP86/def2-TZVP<sup>[7]</sup> method on the BP86/def2-SVP geometries.

## (S9) Discussion on D→→I Conversion: Key Conformational Changes in Ti–O<sub>a</sub>CH(CH<sub>3</sub>)O<sub>b</sub>CH<sub>3</sub> Fragment :

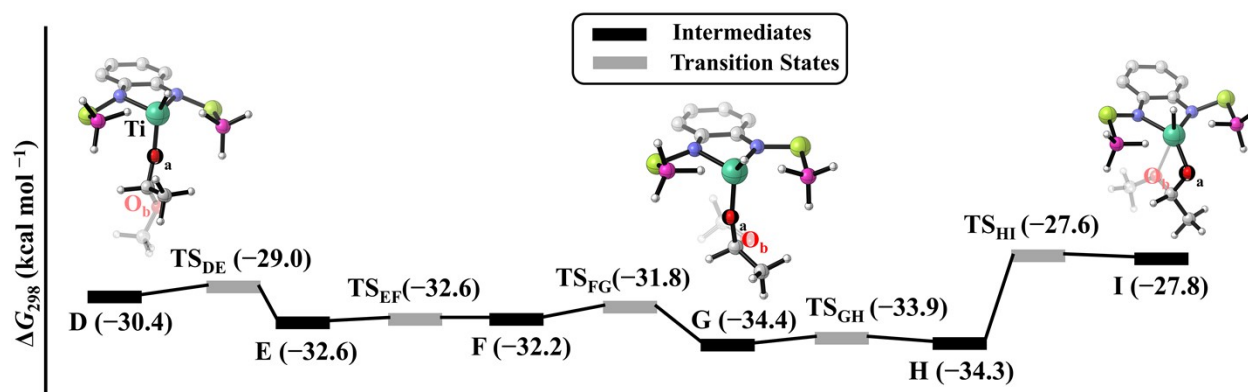

Figure S85. D→→I conversion. Conformational changes occur in the Ti-coordinated CH<sub>3</sub>C(O<sub>a</sub>)(O<sub>b</sub>)CH<sub>3</sub> unit. BP86-D3/def2-TZVP // BP86-D3/def2-SVP is used. Gibbs free energies ΔG<sub>298</sub> [kcal mol<sup>-1</sup>] are relative to A.

### S9.1. D→TS<sub>DE</sub>→E: Rotation Around C–O<sub>b</sub> Bond

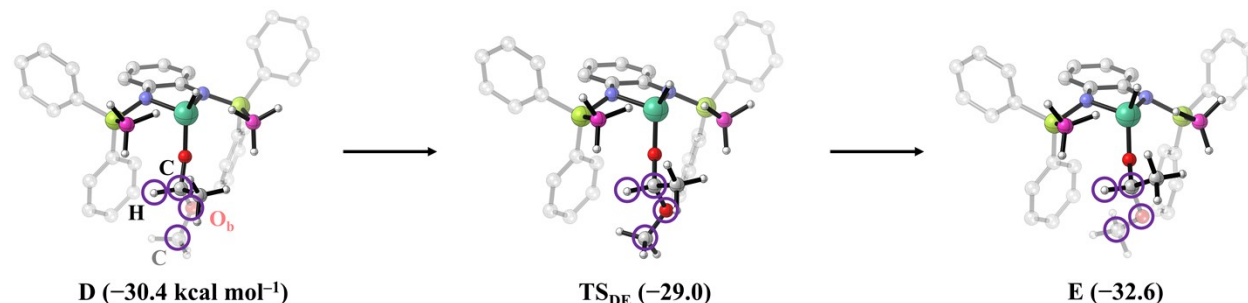

The intermediate **D** is connected to the transition state **TS<sub>DE</sub>** involving rotation along C–O<sub>b</sub> with a minute activation barrier of 1.4 kcal mol<sup>-1</sup> to give intermediate **E**. The dihedral angle H–C–O<sub>b</sub>–C is –40.44° in **D**, –12.21° in **TS<sub>DE</sub>** and 45.05° in **E**, respectively which clearly indicate the rotation around –O<sub>b</sub>CH<sub>3</sub> fragment.

### S9.2. E→TS<sub>EF</sub>→F: Change in Ti–O<sub>a</sub>–C Angle

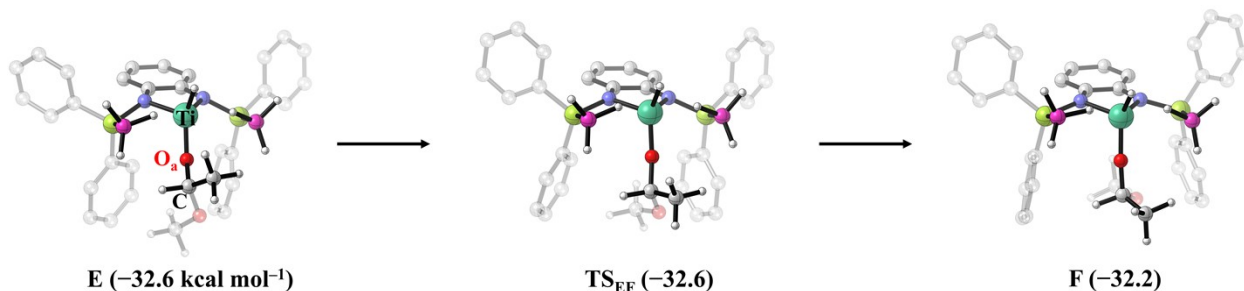

Intermediate **E** undergoes an inward rotation in CH<sub>3</sub>CH(O<sub>a</sub>)(O<sub>b</sub>)CH<sub>3</sub> fragment through **TS<sub>EF</sub>** with a minute activation barrier of 0.1 kcal mol<sup>-1</sup> to produce **F**. This rotation is evidenced by the change in angle of Ti–O<sub>a</sub>–C which is 142.37° in **E**, 168.75° in **TS<sub>EF</sub>** and 199.98° in **F**, respectively.

### S9.3. F→TS<sub>FG</sub>→G: Rotation in Phenyl Rings

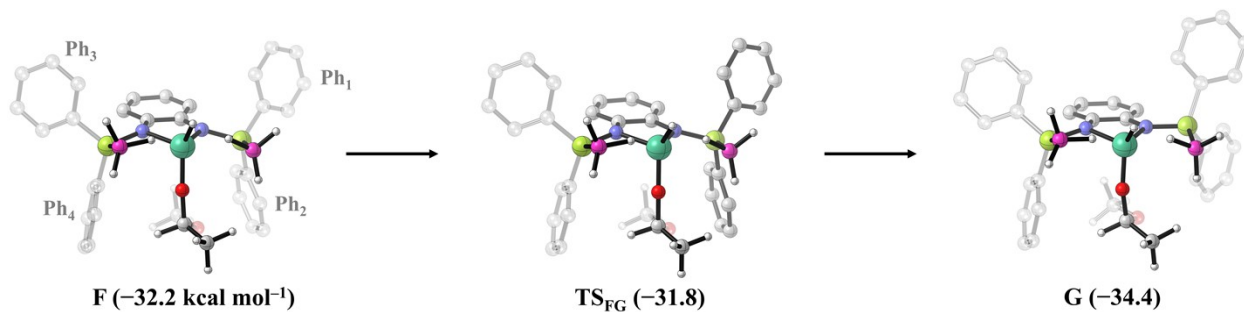

Intermediate **F** is connected to **G** via transition state **TS<sub>FG</sub>** in which a slight rotation in phenyl rings Ph<sub>1</sub> and Ph<sub>2</sub> takes place leading to an activation barrier of merely 0.44 kcal mol<sup>-1</sup>. Due to this rotation, these phenyl rings are now oriented in such a way that there is less steric hindrance.

### S9.4. G→TS<sub>GH</sub>→H: Rotation in Phenyl Ring

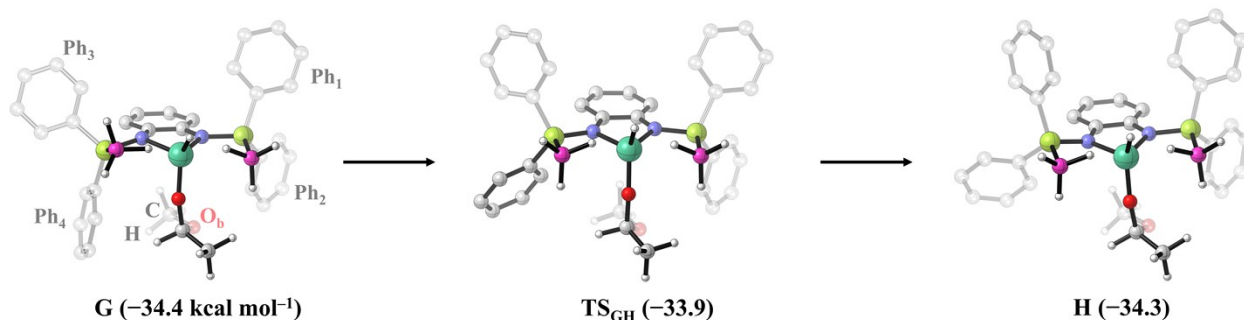

Intermediate **G** undergoes rotation in phenyl ring Ph<sub>4</sub> via TS<sub>GH</sub> with an activation barrier of only 0.5 kcal mol<sup>-1</sup> to produce **H**. Now, the orientation of all phenyl rings allows the free rotation of (O<sub>b</sub>)CH<sub>3</sub> group in the next intermediates and transition states.

### S9.5. H→TS<sub>HI</sub>→I: Rotation of (O<sub>b</sub>)CH<sub>3</sub> Group

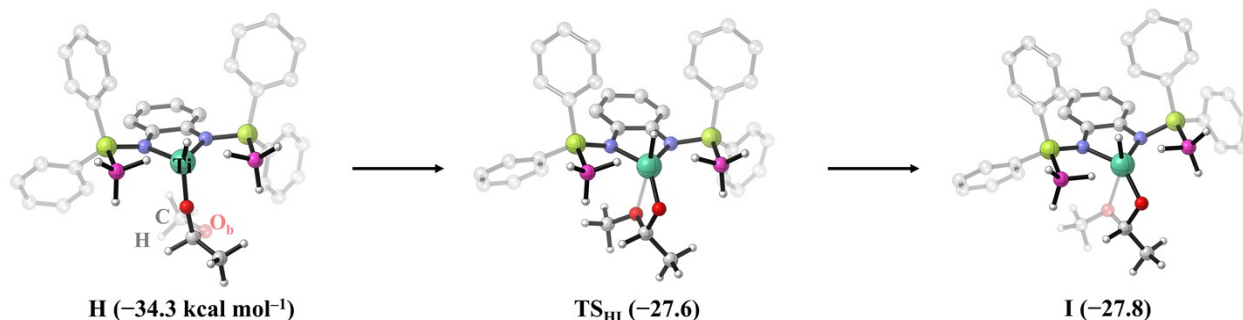

Now, due to rotation of (O<sub>b</sub>)CH<sub>3</sub> group in intermediate **H** via TS<sub>HI</sub>, coordination of methoxy oxygen (O<sub>b</sub>) takes place and leads to the formation of a less stable intermediate **I** (in comparison with **H**). The activation barrier for this conversion is 6.7 kcal mol<sup>-1</sup>. The Ti–O<sub>b</sub> distance is 3.53 Å in **H**, 2.41 Å in TS<sub>HI</sub> and 2.23 Å in **I** are in line with observation of coordination of O<sub>b</sub> to Ti centre.

### (S10) Discussion on J→→O Conversion: Key Changes in Acetaldehyde Orientation Around the Ti Center :

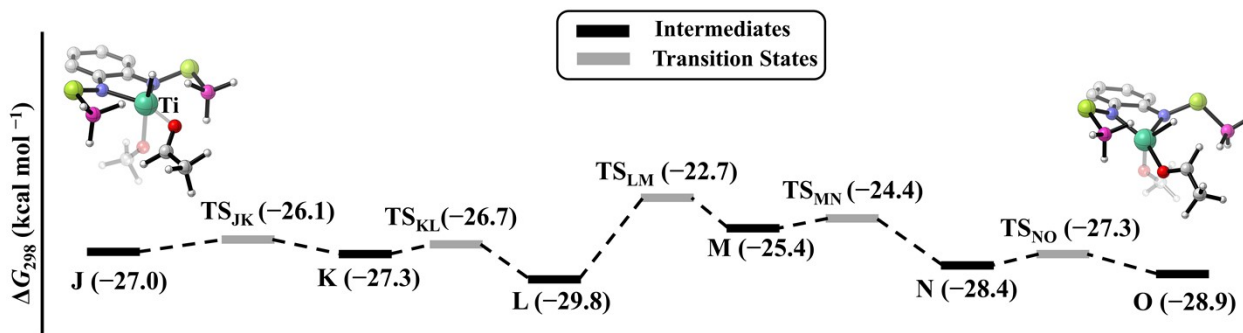

**Figure S8.** J→→O conversion. Changes in acetaldehyde orientation around the Ti center. BP86-D3/def2-TZVP // BP86-D3/def2-SVP is used. Gibbs free energies ΔG<sub>298</sub> [kcal mol<sup>-1</sup>] are relative to **A**.

#### S10.1. J→TS<sub>JK</sub>→K: Rotation Around Ti–O<sub>a</sub> Bond



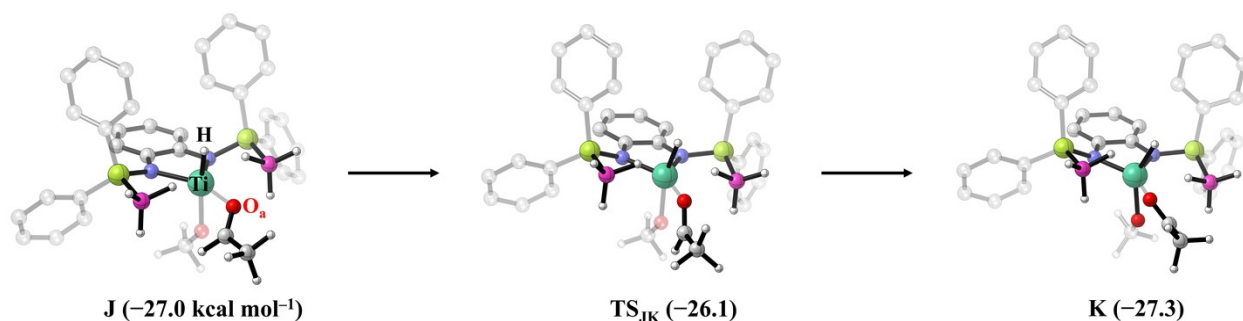

The second intramolecular hydride transfer to carbonyl carbon does not take place until hydride and carbonyl carbon are on the same plane. In intermediate **J**, hydride and carbonyl carbon are in opposite planes. That is the reason, in intermediate **J**, the rotation of  $\text{CH}_3\text{C}(\text{O}_a)\text{H}$  fragment around  $\text{Ti}-\text{O}_a$  bond occurs via **TS<sub>JK</sub>** with the activation barrier of only  $0.9 \text{ kcal mol}^{-1}$  and leads to intermediate **K**. However, this rotational step is not enough to make them in the same plane.

### S10.2. **K**→**TS<sub>KL</sub>**→**L**: Change in Nonbonding $\text{Ti}-\text{B}_a$ Distance

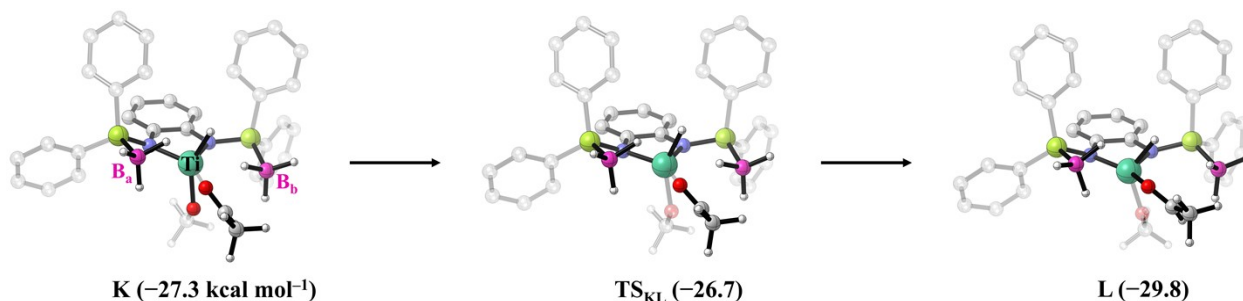

Intermediate **K** is connected to **L** via **TS<sub>KL</sub>** with the activation barrier of only  $0.6 \text{ kcal mol}^{-1}$ . The structure of **TS<sub>KL</sub>** shows a small increase in nonbonding  $\text{Ti}-\text{B}_a$  distance from  $3.08 \text{ \AA}$  upto  $3.09 \text{ \AA}$ , whereas this distance of  $3.57 \text{ \AA}$  is found in **L**. The increase in this distance will allow further rotation of  $\text{CH}_3\text{C}(\text{O}_a)\text{H}$  fragment around  $\text{Ti}-\text{O}_a$  bond.

### S10.3. **L**→**TS<sub>LM</sub>**→**M**: Rotation Around $\text{Ti}-\text{O}_a$ Bond

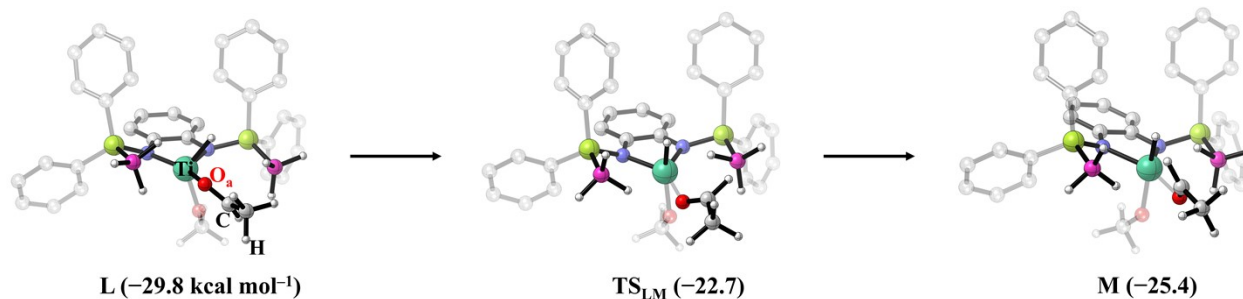

In intermediate **L**, rotation of  $\text{CH}_3\text{C}(\text{O}_a)\text{H}$  fragment around  $\text{Ti}-\text{O}_a$  bond occurs via **TS<sub>LM</sub>** to produce **M** with an activation barrier of  $7.1 \text{ kcal mol}^{-1}$ .

### S10.4. M→TS<sub>MN</sub>→N: Change in dihedral Angle in H–Ti–(O)<sub>a</sub>–CHCH<sub>3</sub>

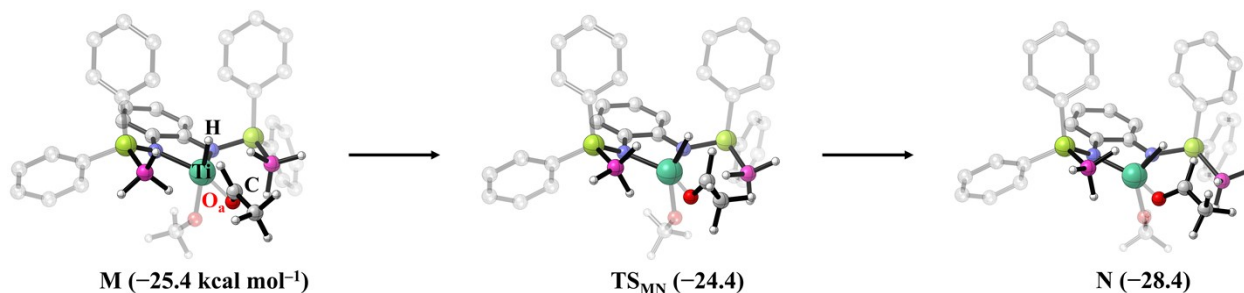

Intermediate **M** is connected to **N** via a transition state **TS<sub>MN</sub>** with an activation barrier of 1 kcal mol<sup>–1</sup>. The transition state involves the change in dihedral angle in H–Ti–(O)<sub>a</sub>–CHCH<sub>3</sub> around Ti–O<sub>a</sub> bond. Now, hydride and carbonyl carbon are in one plane for hydride transfer.

### S10.5. N→TS<sub>NO</sub>→O: Rotation in Phenyl Ring

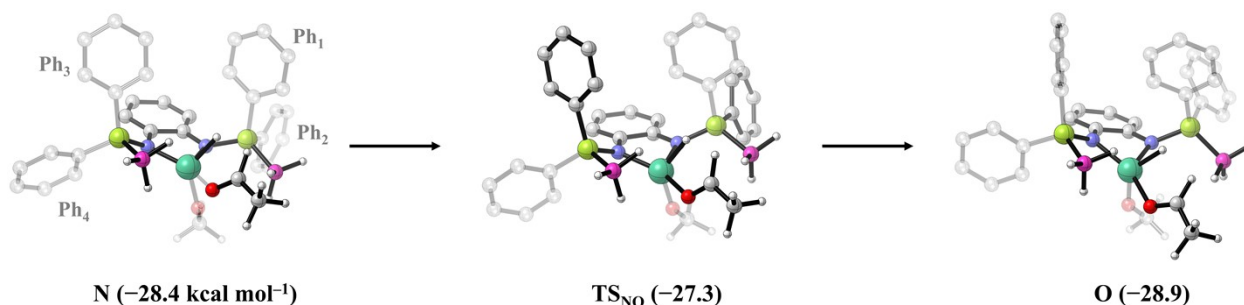

Before hydride transfer to the carbonyl carbon, there is a rotation in Ph<sub>3</sub> (phenyl ring) in **N** connected to **O** via **TS<sub>NO</sub>** with an activation barrier of 1.1 kcal mol<sup>–1</sup>. Now, in the subsequent step, there will be a second intramolecular hydride transfer.

### (S11) Energy Table for Figure 3:

Total electronic energies and Gibbs free energies (298 K) of the molecules present in Figure 3. Employed DFT method: BP86-D3/def2-TZVP // BP86-D3/def2-SVP.

| Molecule               | E <sub>tot</sub> [au] | G <sub>298</sub> [au] | Imaginary Frequency |
|------------------------|-----------------------|-----------------------|---------------------|
| <b>A</b>               | –2854.787918          | –2854.326820          |                     |
| <b>B</b>               | –268.504041           | –268.446473           |                     |
| <b>C</b>               | –3123.309843          | –3122.766509          |                     |
| <b>TS<sub>CD</sub></b> | –3123.306837          | –3122.762590          | <i>i</i> 40         |
| <b>D</b>               | –3123.369182          | –3122.821740          |                     |
| <b>G</b>               | –3123.377585          | –3122.828109          |                     |

|                        |              |              |             |
|------------------------|--------------|--------------|-------------|
| <b>I</b>               | -3123.367052 | -3122.817575 |             |
| <b>TS<sub>IJ</sub></b> | -3123.348813 | -3122.803809 | <i>i95</i>  |
| <b>J</b>               | -3123.358379 | -3122.816335 |             |
| <b>O</b>               | -3123.361247 | -3122.819353 |             |
| <b>TS<sub>OP</sub></b> | -3123.356828 | -3122.813810 | <i>i104</i> |
| <b>P</b>               | -3123.443789 | -3122.895992 |             |

### (S12) Energy Table for Figure S85:

Total electronic energies and Gibbs free energies (298 K) of the molecules present in Figure S85. Employed DFT method: BP86-D3/def2-TZVP // BP86-D3/def2-SVP.

| Molecule               | $E_{\text{tot}}$ [au] | $G_{298}$ [au] | Imaginary Frequency |
|------------------------|-----------------------|----------------|---------------------|
| <b>D</b>               | -3123.369182          | -3122.821740   |                     |
| <b>TS<sub>DE</sub></b> | -3123.368894          | -2854.819547   | <i>i50</i>          |
| <b>E</b>               | -3123.373775          | -3122.825288   |                     |
| <b>TS<sub>EF</sub></b> | -3123.373872          | -3122.825185   | <i>i22</i>          |
| <b>F</b>               | -3123.374158          | -3122.824671   |                     |
| <b>TS<sub>FG</sub></b> | -3123.373954          | -3122.823910   | <i>i20</i>          |
| <b>G</b>               | -3123.377585          | -3122.828109   |                     |
| <b>TS<sub>GH</sub></b> | -3123.375910          | -3122.827240   | <i>i13</i>          |
| <b>H</b>               | -3123.375541          | -3122.827936   |                     |
| <b>TS<sub>HI</sub></b> | -3123.356828          | -3122.817276   | <i>i35</i>          |
| <b>I</b>               | -3123.367052          | -3122.817575   |                     |

### (S13) Energy Table for Figure S86:

Total electronic energies and Gibbs free energies (298 K) of the molecules present in Figure S86. Employed DFT method: BP86-D3/def2-TZVP // BP86-D3/def2-SVP.

| Molecule               | $E_{\text{tot}}$ [au] | $G_{298}$ [au] | Imaginary Frequency |
|------------------------|-----------------------|----------------|---------------------|
| <b>J</b>               | -3123.358379          | -3122.816335   |                     |
| <b>TS<sub>JK</sub></b> | -3123.356931          | -2854.814808   | <i>i54</i>          |

|                        |              |              |            |
|------------------------|--------------|--------------|------------|
| <b>K</b>               | -3123.359765 | -3122.816802 |            |
| <b>TS<sub>KL</sub></b> | -3123.359810 | -3122.815886 | <i>i27</i> |
| <b>L</b>               | -3123.364657 | -3122.820833 |            |
| <b>TS<sub>LM</sub></b> | -3123.352110 | -3122.809519 | <i>i59</i> |
| <b>M</b>               | -3123.355120 | -3122.813712 |            |
| <b>TS<sub>MN</sub></b> | -3123.353605 | -3122.812123 | <i>i99</i> |
| <b>N</b>               | -3123.360687 | -3122.818571 |            |
| <b>TS<sub>NO</sub></b> | -3123.360000 | -3122.816860 | <i>i14</i> |
| <b>O</b>               | -3123.361247 | -3122.819353 |            |

---

## (S14) Cartesian Coordinates of the Optimized Structures

DFT optimization method: BP86-D3/def2-SVP

### S14.1 XYZ coordinates of the molecules present in Figure 3

**A**

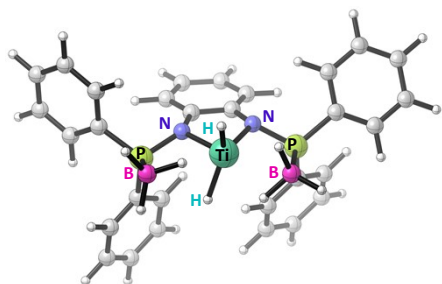

|    |              |             |              |
|----|--------------|-------------|--------------|
| Ti | 7.491971000  | 1.325268000 | 30.089011000 |
| H  | 8.513558000  | 0.691927000 | 28.869795000 |
| H  | 7.790000000  | 1.634897000 | 31.751005000 |
| P  | 8.713972000  | 3.945357000 | 30.675057000 |
| P  | 4.758704000  | 0.403634000 | 30.068667000 |
| N  | 7.414631000  | 3.318732000 | 29.797418000 |
| N  | 5.581338000  | 1.712937000 | 29.444898000 |
| C  | 6.220438000  | 3.960610000 | 29.444852000 |
| C  | 5.148405000  | 3.031486000 | 29.279880000 |
| C  | 3.847159000  | 3.490314000 | 29.009564000 |
| H  | 3.016561000  | 2.774046000 | 28.921254000 |
| C  | 3.619323000  | 4.871504000 | 28.864857000 |
| H  | 2.602913000  | 5.234279000 | 28.650004000 |
| C  | 4.681154000  | 5.784698000 | 28.989944000 |
| H  | 4.495614000  | 6.862755000 | 28.867968000 |
| C  | 5.983402000  | 5.339058000 | 29.281597000 |
| H  | 6.804906000  | 6.057083000 | 29.402805000 |
| C  | 9.286929000  | 5.467458000 | 29.824071000 |
| C  | 9.699667000  | 5.326838000 | 28.481716000 |
| H  | 9.688665000  | 4.331992000 | 28.009699000 |
| C  | 10.106248000 | 6.453093000 | 27.752931000 |
| H  | 10.421550000 | 6.340530000 | 26.704747000 |
| C  | 10.113764000 | 7.721678000 | 28.360370000 |
| H  | 10.436060000 | 8.604444000 | 27.787517000 |
| C  | 9.710119000  | 7.861766000 | 29.698201000 |

|   |              |              |              |
|---|--------------|--------------|--------------|
| H | 9.714536000  | 8.853842000  | 30.175619000 |
| C | 9.292771000  | 6.738445000  | 30.431511000 |
| H | 8.959256000  | 6.852382000  | 31.473334000 |
| C | 8.122630000  | 4.504896000  | 32.312109000 |
| C | 9.079744000  | 4.826162000  | 33.297007000 |
| H | 10.153422000 | 4.731169000  | 33.070808000 |
| C | 8.663195000  | 5.250081000  | 34.568969000 |
| H | 9.412944000  | 5.496996000  | 35.335993000 |
| C | 7.292569000  | 5.349076000  | 34.863740000 |
| H | 6.966369000  | 5.683447000  | 35.860382000 |
| C | 6.339453000  | 5.014901000  | 33.886469000 |
| H | 5.264309000  | 5.088560000  | 34.112190000 |
| C | 6.748650000  | 4.589124000  | 32.612936000 |
| H | 5.999305000  | 4.321610000  | 31.854773000 |
| C | 3.625424000  | -0.339740000 | 28.855371000 |
| C | 2.932366000  | -1.526421000 | 29.175873000 |
| H | 3.058646000  | -1.992995000 | 30.165897000 |
| C | 2.090166000  | -2.118166000 | 28.222789000 |
| H | 1.550910000  | -3.044966000 | 28.469761000 |
| C | 1.947310000  | -1.535426000 | 26.950814000 |
| H | 1.288723000  | -2.003648000 | 26.203434000 |
| C | 2.653982000  | -0.365178000 | 26.627046000 |
| H | 2.551475000  | 0.084039000  | 25.627759000 |
| C | 3.499412000  | 0.233510000  | 27.574677000 |
| H | 4.070164000  | 1.140501000  | 27.326551000 |
| C | 3.771214000  | 0.988697000  | 31.490643000 |
| C | 2.366568000  | 0.904342000  | 31.543577000 |
| H | 1.810500000  | 0.424090000  | 30.724224000 |
| C | 1.677046000  | 1.443861000  | 32.642555000 |
| H | 0.578846000  | 1.377024000  | 32.683267000 |
| C | 2.384726000  | 2.070730000  | 33.681132000 |
| H | 1.841551000  | 2.492076000  | 34.540968000 |
| C | 3.787123000  | 2.164552000  | 33.621571000 |
| H | 4.347956000  | 2.657850000  | 34.429791000 |
| C | 4.483290000  | 1.628401000  | 32.529885000 |
| H | 5.582671000  | 1.720307000  | 32.478826000 |
| B | 10.013977000 | 2.515650000  | 30.695984000 |
| H | 9.449492000  | 1.504337000  | 30.176384000 |
| H | 10.410119000 | 2.334074000  | 31.835625000 |
| H | 10.868523000 | 2.793376000  | 29.862202000 |
| B | 6.283798000  | -0.688907000 | 30.534436000 |
| H | 6.857416000  | -0.042460000 | 31.450244000 |
| H | 7.007340000  | -0.629320000 | 29.509535000 |
| H | 6.026990000  | -1.822703000 | 30.884540000 |

**C**

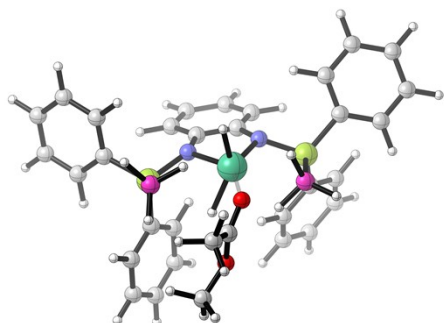

|    |             |             |              |
|----|-------------|-------------|--------------|
| Ti | 7.498959000 | 1.075930000 | 31.122245000 |
| H  | 7.199006000 | 0.679394000 | 32.761805000 |
| P  | 8.965945000 | 3.689415000 | 30.741021000 |
| P  | 4.883809000 | 0.174107000 | 29.959932000 |
| N  | 7.410973000 | 3.149985000 | 31.044886000 |
| N  | 5.558656000 | 1.569124000 | 30.617614000 |

|   |              |              |              |
|---|--------------|--------------|--------------|
| C | 6.241211000  | 3.805010000  | 30.649350000 |
| C | 5.170147000  | 2.892036000  | 30.408590000 |
| C | 3.921205000  | 3.391142000  | 29.976183000 |
| H | 3.089684000  | 2.703481000  | 29.778308000 |
| C | 3.754088000  | 4.772988000  | 29.778080000 |
| H | 2.779396000  | 5.151976000  | 29.434485000 |
| C | 4.816136000  | 5.667060000  | 30.003242000 |
| H | 4.677864000  | 6.745892000  | 29.834177000 |
| C | 6.063609000  | 5.184865000  | 30.437820000 |
| H | 6.901963000  | 5.877583000  | 30.601544000 |
| C | 8.979636000  | 4.352947000  | 29.034548000 |
| C | 8.514584000  | 3.479076000  | 28.025700000 |
| H | 8.192184000  | 2.456731000  | 28.283091000 |
| C | 8.439620000  | 3.922476000  | 26.698738000 |
| H | 8.079227000  | 3.234914000  | 25.919156000 |
| C | 8.818871000  | 5.236124000  | 26.368839000 |
| H | 8.754912000  | 5.582707000  | 25.325924000 |
| C | 9.269293000  | 6.108783000  | 27.372458000 |
| H | 9.555398000  | 7.140944000  | 27.119543000 |
| C | 9.347222000  | 5.671400000  | 28.705596000 |
| H | 9.683071000  | 6.364206000  | 29.491580000 |
| C | 9.454899000  | 5.033000000  | 31.870491000 |
| C | 10.747882000 | 5.594238000  | 31.795898000 |
| H | 11.461739000 | 5.244122000  | 31.033288000 |
| C | 11.126589000 | 6.595857000  | 32.702736000 |
| H | 12.133033000 | 7.037046000  | 32.642733000 |
| C | 10.224090000 | 7.028842000  | 33.690593000 |
| H | 10.522605000 | 7.815622000  | 34.400509000 |
| C | 8.946029000  | 6.451683000  | 33.779799000 |
| H | 8.243390000  | 6.780785000  | 34.560476000 |
| C | 8.559348000  | 5.450172000  | 32.875348000 |
| H | 7.567120000  | 4.979564000  | 32.941895000 |
| C | 5.151683000  | 0.160424000  | 28.147226000 |
| C | 5.130266000  | -1.070821000 | 27.462333000 |
| H | 4.951278000  | -2.001985000 | 28.021795000 |
| C | 5.352393000  | -1.108112000 | 26.075680000 |
| H | 5.335841000  | -2.072212000 | 25.543420000 |
| C | 5.596840000  | 0.081996000  | 25.369087000 |
| H | 5.773173000  | 0.051826000  | 24.282658000 |
| C | 5.615277000  | 1.310710000  | 26.052972000 |
| H | 5.799656000  | 2.246873000  | 25.503944000 |
| C | 5.395334000  | 1.354771000  | 27.437984000 |
| H | 5.419836000  | 2.315763000  | 27.972996000 |
| C | 3.058132000  | 0.256999000  | 30.153744000 |
| C | 2.160254000  | 0.156808000  | 29.072865000 |
| H | 2.544634000  | 0.028122000  | 28.050210000 |
| C | 0.775854000  | 0.238088000  | 29.299996000 |
| H | 0.078359000  | 0.160907000  | 28.451715000 |
| C | 0.284811000  | 0.426145000  | 30.602351000 |
| H | -0.799930000 | 0.498550000  | 30.777969000 |
| C | 1.180066000  | 0.524268000  | 31.683139000 |
| H | 0.797458000  | 0.675370000  | 32.704171000 |
| C | 2.561051000  | 0.434238000  | 31.463299000 |
| H | 3.266220000  | 0.517802000  | 32.304881000 |
| B | 9.818742000  | 1.989638000  | 30.975054000 |
| H | 9.339975000  | 1.636444000  | 32.074559000 |
| H | 11.030855000 | 1.918168000  | 30.928732000 |
| H | 9.281786000  | 1.319482000  | 30.060449000 |
| B | 5.690304000  | -1.246800000 | 30.968187000 |
| H | 6.514828000  | -0.617587000 | 31.690060000 |
| H | 6.176195000  | -2.100604000 | 30.232302000 |
| H | 4.863630000  | -1.663525000 | 31.774109000 |
| O | 8.826873000  | -0.736911000 | 31.396595000 |
| C | 8.941676000  | -1.735531000 | 30.687447000 |
| H | 7.333200000  | 0.261829000  | 29.631718000 |
| O | 8.917809000  | -1.595131000 | 29.357680000 |
| C | 8.748737000  | -2.718942000 | 28.490974000 |

|   |             |              |              |
|---|-------------|--------------|--------------|
| H | 9.612994000 | -3.414034000 | 28.539713000 |
| H | 7.809855000 | -3.258798000 | 28.730386000 |
| H | 8.669720000 | -2.300553000 | 27.471953000 |
| C | 9.093133000 | -3.109390000 | 31.284391000 |
| H | 8.127055000 | -3.643653000 | 31.164096000 |
| H | 9.883874000 | -3.707884000 | 30.791217000 |
| H | 9.302535000 | -3.003779000 | 32.362167000 |

### TS<sub>CD</sub>

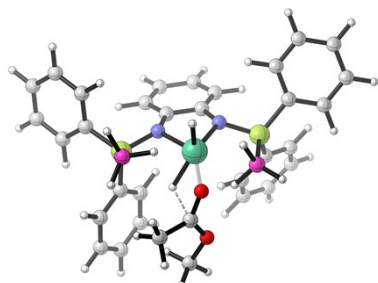

|    |              |              |              |
|----|--------------|--------------|--------------|
| Ti | 7.529851000  | 1.026640000  | 31.147026000 |
| H  | 7.397116000  | 0.752362000  | 32.821085000 |
| P  | 8.992254000  | 3.663686000  | 30.786534000 |
| P  | 4.813453000  | 0.082636000  | 30.223865000 |
| N  | 7.430372000  | 3.097720000  | 30.994653000 |
| N  | 5.574714000  | 1.520877000  | 30.657861000 |
| C  | 6.275473000  | 3.743488000  | 30.549654000 |
| C  | 5.200660000  | 2.826685000  | 30.345291000 |
| C  | 3.967652000  | 3.307945000  | 29.850963000 |
| H  | 3.133866000  | 2.617554000  | 29.673902000 |
| C  | 3.816519000  | 4.677492000  | 29.570905000 |
| H  | 2.853588000  | 5.042412000  | 29.182058000 |
| C  | 4.879023000  | 5.576298000  | 29.772973000 |
| H  | 4.753241000  | 6.644713000  | 29.540901000 |
| C  | 6.113133000  | 5.111306000  | 30.260548000 |
| H  | 6.953233000  | 5.806420000  | 30.402352000 |
| C  | 9.091164000  | 4.338031000  | 29.085145000 |
| C  | 8.602153000  | 3.499147000  | 28.058495000 |
| H  | 8.208179000  | 2.500155000  | 28.305977000 |
| C  | 8.595646000  | 3.948418000  | 26.731728000 |
| H  | 8.209357000  | 3.291888000  | 25.937506000 |
| C  | 9.073498000  | 5.233659000  | 26.418710000 |
| H  | 9.063594000  | 5.586729000  | 25.376069000 |
| C  | 9.553381000  | 6.070601000  | 27.438969000 |
| H  | 9.916988000  | 7.080977000  | 27.198204000 |
| C  | 9.559847000  | 5.627448000  | 28.772553000 |
| H  | 9.916071000  | 6.294954000  | 29.571168000 |
| C  | 9.396783000  | 5.008776000  | 31.944941000 |
| C  | 10.703137000 | 5.542909000  | 31.980376000 |
| H  | 11.477228000 | 5.162142000  | 31.295269000 |
| C  | 11.018508000 | 6.553730000  | 32.901204000 |
| H  | 12.035701000 | 6.973145000  | 32.926655000 |
| C  | 10.039141000 | 7.021989000  | 33.795074000 |
| H  | 10.288595000 | 7.815626000  | 34.516135000 |
| C  | 8.746915000  | 6.470062000  | 33.777626000 |
| H  | 7.983723000  | 6.825617000  | 34.486426000 |
| C  | 8.422801000  | 5.459938000  | 32.858188000 |
| H  | 7.419178000  | 5.009712000  | 32.845764000 |
| C  | 5.108550000  | -0.220084000 | 28.437340000 |
| C  | 5.043088000  | -1.537012000 | 27.941944000 |
| H  | 4.771708000  | -2.360231000 | 28.620463000 |
| C  | 5.348888000  | -1.798051000 | 26.595090000 |
| H  | 5.303171000  | -2.829935000 | 26.213554000 |
| C  | 5.715210000  | -0.745534000 | 25.739064000 |

|   |              |              |              |
|---|--------------|--------------|--------------|
| H | 5.958297000  | -0.951359000 | 24.685253000 |
| C | 5.767461000  | 0.571769000  | 26.231878000 |
| H | 6.048583000  | 1.400149000  | 25.563441000 |
| C | 5.465974000  | 0.837584000  | 27.575517000 |
| H | 5.528267000  | 1.864908000  | 27.965100000 |
| C | 2.993812000  | 0.270627000  | 30.365405000 |
| C | 2.117014000  | 0.076905000  | 29.279279000 |
| H | 2.519003000  | -0.197397000 | 28.292632000 |
| C | 0.733996000  | 0.250517000  | 29.453770000 |
| H | 0.053165000  | 0.097671000  | 28.602264000 |
| C | 0.223411000  | 0.625754000  | 30.707451000 |
| H | -0.859884000 | 0.771692000  | 30.840193000 |
| C | 1.097049000  | 0.817642000  | 31.793343000 |
| H | 0.699163000  | 1.115010000  | 32.775555000 |
| C | 2.476557000  | 0.633966000  | 31.627897000 |
| H | 3.164337000  | 0.787075000  | 32.473387000 |
| B | 9.828950000  | 1.960784000  | 31.039328000 |
| H | 9.297282000  | 1.585981000  | 32.110925000 |
| H | 11.038685000 | 1.863237000  | 31.039165000 |
| H | 9.309588000  | 1.332177000  | 30.089720000 |
| B | 5.544539000  | -1.185981000 | 31.454625000 |
| H | 6.584923000  | -0.615940000 | 31.892117000 |
| H | 5.757463000  | -2.261981000 | 30.915934000 |
| H | 4.779291000  | -1.220408000 | 32.410579000 |
| O | 8.925094000  | -0.825721000 | 31.338313000 |
| C | 8.953055000  | -1.495034000 | 30.302491000 |
| H | 7.256098000  | 0.065164000  | 29.738474000 |
| O | 9.518237000  | -0.967151000 | 29.200108000 |
| C | 9.167501000  | -1.463891000 | 27.902891000 |
| H | 9.456124000  | -2.527014000 | 27.768768000 |
| H | 8.077733000  | -1.338782000 | 27.730191000 |
| H | 9.726209000  | -0.843557000 | 27.180846000 |
| C | 8.438377000  | -2.906707000 | 30.237194000 |
| H | 7.474639000  | -2.897948000 | 29.689360000 |
| H | 9.140398000  | -3.583572000 | 29.711424000 |
| H | 8.240865000  | -3.260615000 | 31.262145000 |

## D

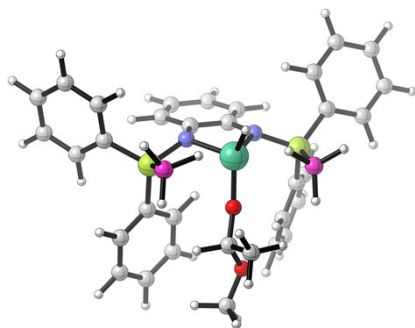

|    |             |             |              |
|----|-------------|-------------|--------------|
| Ti | 7.231252000 | 0.994663000 | 31.425273000 |
| H  | 7.469263000 | 0.446069000 | 33.030502000 |
| P  | 8.960734000 | 3.443226000 | 31.003195000 |
| P  | 4.590441000 | 0.172473000 | 30.335695000 |
| N  | 7.339857000 | 3.015705000 | 31.204363000 |
| N  | 5.335310000 | 1.559246000 | 30.930647000 |
| C  | 6.227506000 | 3.723869000 | 30.717663000 |
| C  | 5.081736000 | 2.890880000 | 30.555114000 |
| C  | 3.882307000 | 3.434945000 | 30.062995000 |
| H  | 3.000721000 | 2.794899000 | 29.931693000 |
| C  | 3.823652000 | 4.802518000 | 29.732335000 |
| H  | 2.884504000 | 5.222517000 | 29.341560000 |
| C  | 4.949224000 | 5.624642000 | 29.896947000 |
| H  | 4.898268000 | 6.692659000 | 29.637396000 |
| C  | 6.153981000 | 5.089907000 | 30.392746000 |



|   |              |              |              |
|---|--------------|--------------|--------------|
| H | 7.028957000  | 5.737230000  | 30.534105000 |
| C | 9.190563000  | 3.846667000  | 29.233676000 |
| C | 9.244375000  | 2.755124000  | 28.339190000 |
| H | 9.253256000  | 1.718898000  | 28.705983000 |
| C | 9.273528000  | 2.990077000  | 26.956753000 |
| H | 9.321665000  | 2.131645000  | 26.270029000 |
| C | 9.253475000  | 4.304275000  | 26.457467000 |
| H | 9.280626000  | 4.484868000  | 25.371387000 |
| C | 9.201048000  | 5.390132000  | 27.347110000 |
| H | 9.180957000  | 6.420863000  | 26.961429000 |
| C | 9.165020000  | 5.164807000  | 28.732359000 |
| H | 9.117241000  | 6.019535000  | 29.423404000 |
| C | 9.304164000  | 4.967040000  | 31.948671000 |
| C | 10.508128000 | 5.674742000  | 31.749392000 |
| H | 11.225288000 | 5.343702000  | 30.981909000 |
| C | 10.790629000 | 6.804322000  | 32.532159000 |
| H | 11.727776000 | 7.359392000  | 32.373547000 |
| C | 9.880671000  | 7.224337000  | 33.518522000 |
| H | 10.102317000 | 8.113394000  | 34.128388000 |
| C | 8.690538000  | 6.507678000  | 33.729149000 |
| H | 7.979737000  | 6.829948000  | 34.505323000 |
| C | 8.401535000  | 5.376793000  | 32.949649000 |
| H | 7.474200000  | 4.805054000  | 33.106262000 |
| C | 4.940232000  | 0.061958000  | 28.542320000 |
| C | 4.499157000  | -1.064810000 | 27.814916000 |
| H | 3.906505000  | -1.847915000 | 28.314267000 |
| C | 4.820875000  | -1.191508000 | 26.454935000 |
| H | 4.471716000  | -2.069422000 | 25.890032000 |
| C | 5.597584000  | -0.204422000 | 25.821095000 |
| H | 5.855668000  | -0.308336000 | 24.756020000 |
| C | 6.054681000  | 0.904993000  | 26.550652000 |
| H | 6.677941000  | 1.673417000  | 26.069576000 |
| C | 5.729974000  | 1.041504000  | 27.908248000 |
| H | 6.104053000  | 1.904771000  | 28.475075000 |
| C | 2.770044000  | 0.312393000  | 30.491509000 |
| C | 1.906805000  | 0.426118000  | 29.383043000 |
| H | 2.314888000  | 0.393353000  | 28.362104000 |
| C | 0.528480000  | 0.601993000  | 29.585623000 |
| H | -0.142876000 | 0.691866000  | 28.718106000 |
| C | 0.010599000  | 0.674159000  | 30.889660000 |
| H | -1.069185000 | 0.821628000  | 31.046331000 |
| C | 0.871338000  | 0.561153000  | 31.995647000 |
| H | 0.467305000  | 0.618514000  | 33.017829000 |
| C | 2.246944000  | 0.374327000  | 31.800355000 |
| H | 2.924289000  | 0.285582000  | 32.663548000 |
| B | 9.883014000  | 1.874912000  | 31.657034000 |
| H | 8.985259000  | 1.246604000  | 32.299870000 |
| H | 10.651883000 | 2.228314000  | 32.539450000 |
| H | 10.380465000 | 1.246954000  | 30.740011000 |
| B | 5.398115000  | -1.210679000 | 31.413364000 |
| H | 6.316794000  | -0.630704000 | 32.069377000 |
| H | 5.818193000  | -2.123664000 | 30.720036000 |
| H | 4.592364000  | -1.529563000 | 32.277877000 |
| O | 7.860114000  | 0.063564000  | 30.041682000 |
| C | 8.250115000  | -1.008979000 | 29.251604000 |
| H | 7.328419000  | -1.569577000 | 28.948662000 |
| O | 8.847673000  | -0.451777000 | 28.085529000 |
| C | 8.830349000  | -1.311279000 | 26.965645000 |
| H | 9.475116000  | -2.211145000 | 27.103657000 |
| H | 7.795933000  | -1.651019000 | 26.725055000 |
| H | 9.220786000  | -0.736489000 | 26.103695000 |
| C | 9.211945000  | -1.909075000 | 30.020850000 |
| H | 8.704926000  | -2.324315000 | 30.912895000 |
| H | 9.557435000  | -2.753518000 | 29.391104000 |
| H | 10.085858000 | -1.312606000 | 30.345644000 |

**G**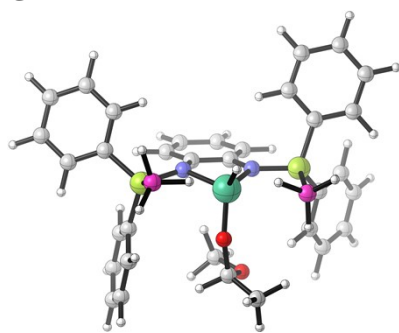

|    |              |              |              |
|----|--------------|--------------|--------------|
| Ti | 0.288927000  | -1.517522000 | 1.333591000  |
| H  | 0.430224000  | -2.031953000 | 2.954796000  |
| P  | 2.897561000  | 0.118706000  | 1.011565000  |
| P  | -2.671014000 | -1.098440000 | 0.688407000  |
| N  | 1.247324000  | 0.155591000  | 0.675610000  |
| N  | -1.213223000 | -0.255439000 | 0.685964000  |
| C  | 0.539165000  | 1.138799000  | -0.031123000 |
| C  | -0.868455000 | 0.894463000  | -0.039951000 |
| C  | -1.723941000 | 1.796060000  | -0.702864000 |
| H  | -2.810368000 | 1.636019000  | -0.685415000 |
| C  | -1.189025000 | 2.921702000  | -1.357443000 |
| H  | -1.866492000 | 3.620365000  | -1.871326000 |
| C  | 0.194763000  | 3.157794000  | -1.347425000 |
| H  | 0.611040000  | 4.040336000  | -1.856086000 |
| C  | 1.061747000  | 2.270875000  | -0.682534000 |
| H  | 2.143717000  | 2.459047000  | -0.676068000 |
| C  | 3.854385000  | 0.478287000  | -0.508063000 |
| C  | 3.689006000  | -0.421109000 | -1.583387000 |
| H  | 3.021369000  | -1.293271000 | -1.484067000 |
| C  | 4.360789000  | -0.185515000 | -2.792255000 |
| H  | 4.225356000  | -0.885558000 | -3.631392000 |
| C  | 5.201635000  | 0.932521000  | -2.932531000 |
| H  | 5.727461000  | 1.111383000  | -3.882969000 |
| C  | 5.369284000  | 1.823204000  | -1.858969000 |
| H  | 6.024143000  | 2.701826000  | -1.965498000 |
| C  | 4.694991000  | 1.601037000  | -0.647234000 |
| H  | 4.815174000  | 2.308049000  | 0.187624000  |
| C  | 3.282962000  | 1.460975000  | 2.188977000  |
| C  | 4.582511000  | 1.544920000  | 2.733567000  |
| H  | 5.356118000  | 0.822624000  | 2.428078000  |
| C  | 4.883829000  | 2.539783000  | 3.675845000  |
| H  | 5.897411000  | 2.602363000  | 4.100073000  |
| C  | 3.888612000  | 3.444098000  | 4.087492000  |
| H  | 4.125477000  | 4.220525000  | 4.831282000  |
| C  | 2.589943000  | 3.348260000  | 3.560258000  |
| H  | 1.806088000  | 4.046760000  | 3.890459000  |
| C  | 2.282533000  | 2.357150000  | 2.613945000  |
| H  | 1.264846000  | 2.273187000  | 2.206295000  |
| C  | -2.933778000 | -1.865061000 | -0.954016000 |
| C  | -2.850379000 | -3.268968000 | -1.061636000 |
| H  | -2.695526000 | -3.867784000 | -0.151740000 |
| C  | -2.960109000 | -3.887919000 | -2.317528000 |
| H  | -2.897741000 | -4.984703000 | -2.393097000 |
| C  | -3.149726000 | -3.111250000 | -3.472507000 |
| H  | -3.236355000 | -3.597661000 | -4.456245000 |
| C  | -3.231276000 | -1.711214000 | -3.370699000 |
| H  | -3.378489000 | -1.099391000 | -4.273597000 |
| C  | -3.126653000 | -1.087444000 | -2.118562000 |
| H  | -3.187480000 | 0.007506000  | -2.049152000 |
| C  | -4.054908000 | 0.073535000  | 0.921546000  |
| C  | -5.285191000 | -0.066412000 | 0.249753000  |
| H  | -5.426867000 | -0.878716000 | -0.479607000 |

|   |              |              |              |
|---|--------------|--------------|--------------|
| C | -6.331109000 | 0.834741000  | 0.511354000  |
| H | -7.291939000 | 0.723393000  | -0.013876000 |
| C | -6.150960000 | 1.873597000  | 1.439046000  |
| H | -6.970539000 | 2.580895000  | 1.639550000  |
| C | -4.924576000 | 2.009037000  | 2.115074000  |
| H | -4.782494000 | 2.822344000  | 2.843279000  |
| C | -3.879918000 | 1.109243000  | 1.864095000  |
| H | -2.915503000 | 1.209814000  | 2.385539000  |
| B | 3.095659000  | -1.659672000 | 1.697938000  |
| H | 1.986007000  | -1.839434000 | 2.299309000  |
| H | 3.919412000  | -1.706419000 | 2.599683000  |
| H | 3.290310000  | -2.412707000 | 0.759295000  |
| B | -2.402888000 | -2.310233000 | 2.152728000  |
| H | -1.155412000 | -2.313537000 | 2.386284000  |
| H | -2.790924000 | -3.446926000 | 1.934873000  |
| H | -2.894151000 | -1.761732000 | 3.129288000  |
| O | 0.361007000  | -2.887663000 | 0.203499000  |
| C | 0.706012000  | -3.462487000 | -1.042615000 |
| H | -0.249478000 | -3.836354000 | -1.486416000 |
| C | 1.706260000  | -4.585370000 | -0.830500000 |
| H | 1.283627000  | -5.342005000 | -0.142892000 |
| H | 1.951760000  | -5.062237000 | -1.798769000 |
| H | 2.628334000  | -4.171233000 | -0.380659000 |
| O | 1.277873000  | -2.512076000 | -1.904899000 |
| C | 0.361014000  | -1.537109000 | -2.389579000 |
| H | -0.405100000 | -1.999104000 | -3.052240000 |
| H | -0.160709000 | -1.013528000 | -1.562905000 |
| H | 0.947082000  | -0.791594000 | -2.958311000 |

## I

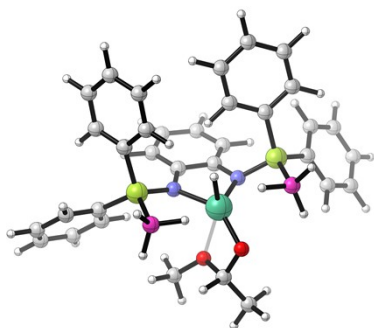

|    |              |             |              |
|----|--------------|-------------|--------------|
| Ti | 7.998547000  | 0.800281000 | 30.104905000 |
| H  | 7.441481000  | 0.884366000 | 31.705850000 |
| P  | 9.099880000  | 3.615095000 | 30.553992000 |
| P  | 5.009664000  | 0.033316000 | 29.816179000 |
| N  | 8.084340000  | 2.748352000 | 29.509462000 |
| N  | 6.111848000  | 1.189894000 | 29.306137000 |
| C  | 6.981762000  | 3.323698000 | 28.845902000 |
| C  | 5.844664000  | 2.461937000 | 28.792161000 |
| C  | 4.624631000  | 2.952110000 | 28.284888000 |
| H  | 3.729500000  | 2.316064000 | 28.292864000 |
| C  | 4.549704000  | 4.263918000 | 27.782314000 |
| H  | 3.592413000  | 4.637142000 | 27.388273000 |
| C  | 5.685497000  | 5.089498000 | 27.780353000 |
| H  | 5.629590000  | 6.108355000 | 27.369206000 |
| C  | 6.900459000  | 4.623519000 | 28.315915000 |
| H  | 7.784697000  | 5.273045000 | 28.324843000 |
| C  | 10.070531000 | 4.905043000 | 29.681843000 |
| C  | 11.250756000 | 4.490725000 | 29.029107000 |
| H  | 11.564572000 | 3.438210000 | 29.097560000 |
| C  | 12.020797000 | 5.417506000 | 28.309631000 |
| H  | 12.942245000 | 5.087269000 | 27.806656000 |
| C  | 11.622757000 | 6.763247000 | 28.242072000 |

|   |              |              |              |
|---|--------------|--------------|--------------|
| H | 12.230553000 | 7.490520000  | 27.682242000 |
| C | 10.450698000 | 7.181934000  | 28.895619000 |
| H | 10.137003000 | 8.236003000  | 28.846111000 |
| C | 9.674759000  | 6.258318000  | 29.611909000 |
| H | 8.755004000  | 6.588723000  | 30.116741000 |
| C | 8.012226000  | 4.496947000  | 31.732925000 |
| C | 8.536088000  | 5.507426000  | 32.567062000 |
| H | 9.586735000  | 5.819111000  | 32.465172000 |
| C | 7.719117000  | 6.113796000  | 33.533847000 |
| H | 8.133583000  | 6.902130000  | 34.181053000 |
| C | 6.379169000  | 5.713551000  | 33.676119000 |
| H | 5.738245000  | 6.195705000  | 34.430443000 |
| C | 5.862881000  | 4.692490000  | 32.861333000 |
| H | 4.819868000  | 4.361500000  | 32.970296000 |
| C | 6.676152000  | 4.077723000  | 31.898026000 |
| H | 6.272786000  | 3.261185000  | 31.283294000 |
| C | 3.900600000  | -0.537641000 | 28.475524000 |
| C | 2.946538000  | -1.531953000 | 28.783573000 |
| H | 2.844158000  | -1.893507000 | 29.818947000 |
| C | 2.135054000  | -2.065361000 | 27.771273000 |
| H | 1.393560000  | -2.841053000 | 28.017347000 |
| C | 2.274431000  | -1.616383000 | 26.445867000 |
| H | 1.638370000  | -2.036894000 | 25.652238000 |
| C | 3.229415000  | -0.634256000 | 26.135182000 |
| H | 3.341604000  | -0.280093000 | 25.099064000 |
| C | 4.044101000  | -0.097317000 | 27.145320000 |
| H | 4.788061000  | 0.674845000  | 26.903373000 |
| C | 3.912772000  | 0.842205000  | 31.042936000 |
| C | 2.602343000  | 1.260549000  | 30.736472000 |
| H | 2.172421000  | 1.039016000  | 29.748366000 |
| C | 1.843051000  | 1.951135000  | 31.695111000 |
| H | 0.821144000  | 2.277515000  | 31.450391000 |
| C | 2.387447000  | 2.223199000  | 32.961054000 |
| H | 1.788877000  | 2.759032000  | 33.713878000 |
| C | 3.695212000  | 1.806142000  | 33.268910000 |
| H | 4.123741000  | 2.014331000  | 34.260863000 |
| C | 4.460169000  | 1.119394000  | 32.314898000 |
| H | 5.491463000  | 0.808458000  | 32.545445000 |
| B | 10.127243000 | 2.226520000  | 31.367249000 |
| H | 9.196893000  | 1.404247000  | 31.611668000 |
| H | 10.526757000 | 2.590951000  | 32.462916000 |
| H | 10.962905000 | 1.815564000  | 30.579955000 |
| B | 6.099107000  | -1.403491000 | 30.495413000 |
| H | 7.158946000  | -0.857051000 | 30.879077000 |
| H | 6.288059000  | -2.203943000 | 29.591224000 |
| H | 5.575051000  | -1.868167000 | 31.497737000 |
| O | 9.453110000  | -0.415063000 | 30.031503000 |
| C | 9.270021000  | -1.153299000 | 28.890097000 |
| H | 8.824588000  | -2.159349000 | 29.101198000 |
| C | 10.529543000 | -1.256511000 | 28.045534000 |
| H | 11.309106000 | -1.789859000 | 28.623464000 |
| H | 10.349546000 | -1.816717000 | 27.105932000 |
| H | 10.893768000 | -0.238520000 | 27.807414000 |
| O | 8.239992000  | -0.355808000 | 28.207303000 |
| C | 7.464958000  | -0.968413000 | 27.186371000 |
| H | 8.125301000  | -1.353350000 | 26.380612000 |
| H | 6.842879000  | -1.794338000 | 27.591400000 |
| H | 6.809221000  | -0.185380000 | 26.767906000 |

**TS<sub>IJ</sub>**

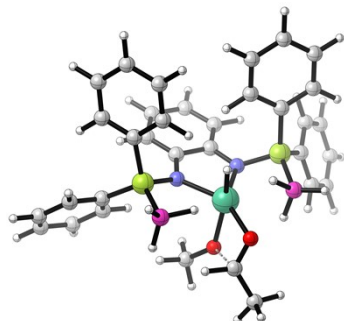

|    |              |              |              |
|----|--------------|--------------|--------------|
| Ti | 7.976917000  | 0.881869000  | 30.024649000 |
| H  | 7.391922000  | 0.924272000  | 31.646697000 |
| P  | 9.067400000  | 3.714075000  | 30.422993000 |
| P  | 4.959470000  | -0.006935000 | 29.674197000 |
| N  | 7.884128000  | 2.880938000  | 29.552338000 |
| N  | 6.067525000  | 1.206975000  | 29.269324000 |
| C  | 6.732115000  | 3.442384000  | 28.995849000 |
| C  | 5.681022000  | 2.489180000  | 28.862321000 |
| C  | 4.418680000  | 2.911373000  | 28.395206000 |
| H  | 3.589428000  | 2.197381000  | 28.311556000 |
| C  | 4.217502000  | 4.255626000  | 28.038445000 |
| H  | 3.230071000  | 4.574322000  | 27.671932000 |
| C  | 5.264108000  | 5.187043000  | 28.148291000 |
| H  | 5.103678000  | 6.236901000  | 27.860285000 |
| C  | 6.521268000  | 4.785460000  | 28.631506000 |
| H  | 7.336617000  | 5.513596000  | 28.725791000 |
| C  | 9.916406000  | 4.992055000  | 29.423555000 |
| C  | 10.924874000 | 4.546301000  | 28.542814000 |
| H  | 11.184239000 | 3.476700000  | 28.511060000 |
| C  | 11.593211000 | 5.463530000  | 27.718101000 |
| H  | 12.379545000 | 5.110309000  | 27.033355000 |
| C  | 11.265707000 | 6.829219000  | 27.772358000 |
| H  | 11.794335000 | 7.547925000  | 27.127622000 |
| C  | 10.265974000 | 7.277907000  | 28.652676000 |
| H  | 10.007159000 | 8.347043000  | 28.696883000 |
| C  | 9.590647000  | 6.364119000  | 29.475436000 |
| H  | 8.804735000  | 6.717805000  | 30.159773000 |
| C  | 8.232424000  | 4.573352000  | 31.800276000 |
| C  | 8.922187000  | 5.516025000  | 32.592153000 |
| H  | 9.955431000  | 5.800296000  | 32.341352000 |
| C  | 8.291571000  | 6.086979000  | 33.708828000 |
| H  | 8.833549000  | 6.819325000  | 34.326709000 |
| C  | 6.975816000  | 5.719356000  | 34.040176000 |
| H  | 6.483486000  | 6.170394000  | 34.915127000 |
| C  | 6.294356000  | 4.769898000  | 33.260181000 |
| H  | 5.266596000  | 4.471104000  | 33.514262000 |
| C  | 6.919675000  | 4.189641000  | 32.146876000 |
| H  | 6.395222000  | 3.427924000  | 31.553174000 |
| C  | 3.943791000  | -0.491480000 | 28.233787000 |
| C  | 2.915047000  | -1.441079000 | 28.415485000 |
| H  | 2.690198000  | -1.823581000 | 29.423321000 |
| C  | 2.186933000  | -1.906875000 | 27.310120000 |
| H  | 1.383270000  | -2.644675000 | 27.457799000 |
| C  | 2.489297000  | -1.439710000 | 26.019099000 |
| H  | 1.918248000  | -1.807403000 | 25.153176000 |
| C  | 3.526467000  | -0.510017000 | 25.834648000 |
| H  | 3.770648000  | -0.147602000 | 24.824587000 |
| C  | 4.255941000  | -0.037711000 | 26.936944000 |
| H  | 5.071449000  | 0.686749000  | 26.796303000 |
| C  | 3.828551000  | 0.763886000  | 30.895425000 |
| C  | 2.463186000  | 1.016803000  | 30.663178000 |
| H  | 1.999862000  | 0.715561000  | 29.712040000 |
| C  | 1.693263000  | 1.664037000  | 31.644164000 |
| H  | 0.627362000  | 1.864361000  | 31.456213000 |

|   |              |              |              |
|---|--------------|--------------|--------------|
| C | 2.282968000  | 2.061858000  | 32.855008000 |
| H | 1.676566000  | 2.566123000  | 33.623302000 |
| C | 3.648571000  | 1.815068000  | 33.084945000 |
| H | 4.114576000  | 2.121919000  | 34.034037000 |
| C | 4.423209000  | 1.169160000  | 32.111072000 |
| H | 5.501928000  | 0.993128000  | 32.270464000 |
| B | 10.054378000 | 2.150930000  | 30.901896000 |
| H | 9.115064000  | 1.592111000  | 31.533363000 |
| H | 11.014270000 | 2.251739000  | 31.640827000 |
| H | 10.268716000 | 1.614545000  | 29.812535000 |
| B | 6.036367000  | -1.442993000 | 30.331146000 |
| H | 6.987232000  | -0.801560000 | 30.831596000 |
| H | 6.343540000  | -2.136720000 | 29.370377000 |
| H | 5.461503000  | -2.025376000 | 31.240973000 |
| O | 9.330246000  | -0.648546000 | 30.736762000 |
| C | 9.345723000  | -1.559724000 | 29.871883000 |
| H | 8.436090000  | -2.184941000 | 29.706272000 |
| C | 10.630071000 | -2.039706000 | 29.270335000 |
| H | 10.990890000 | -2.910785000 | 29.861017000 |
| H | 10.462223000 | -2.391461000 | 28.233986000 |
| H | 11.396253000 | -1.242625000 | 29.299555000 |
| O | 8.496724000  | -0.186598000 | 28.475041000 |
| C | 7.863971000  | -0.422246000 | 27.249401000 |
| H | 8.578293000  | -0.890816000 | 26.531988000 |
| H | 6.989426000  | -1.105187000 | 27.360200000 |
| H | 7.498768000  | 0.527678000  | 26.796381000 |

## J

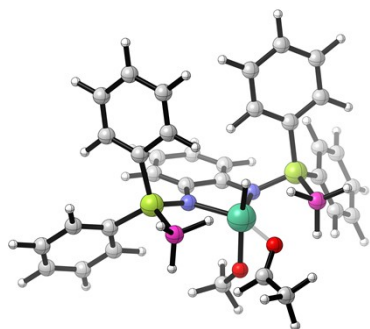

|    |              |              |              |
|----|--------------|--------------|--------------|
| Ti | 7.952068000  | 0.871299000  | 29.823458000 |
| H  | 7.704802000  | 0.677004000  | 31.539254000 |
| P  | 9.053668000  | 3.713992000  | 30.220023000 |
| P  | 4.944118000  | -0.017721000 | 29.610651000 |
| N  | 7.881564000  | 2.874107000  | 29.342907000 |
| N  | 6.012112000  | 1.228220000  | 29.214169000 |
| C  | 6.712349000  | 3.432007000  | 28.806925000 |
| C  | 5.632143000  | 2.501604000  | 28.770536000 |
| C  | 4.359233000  | 2.927242000  | 28.341054000 |
| H  | 3.514189000  | 2.227157000  | 28.334210000 |
| C  | 4.170443000  | 4.255397000  | 27.919474000 |
| H  | 3.174056000  | 4.578514000  | 27.582247000 |
| C  | 5.243791000  | 5.160993000  | 27.923027000 |
| H  | 5.096642000  | 6.195784000  | 27.578877000 |
| C  | 6.514352000  | 4.754430000  | 28.368785000 |
| H  | 7.350792000  | 5.464457000  | 28.372577000 |
| C  | 9.819462000  | 5.078652000  | 29.266673000 |
| C  | 10.828276000 | 4.726728000  | 28.344717000 |
| H  | 11.136767000 | 3.673752000  | 28.254142000 |
| C  | 11.435212000 | 5.715509000  | 27.555664000 |
| H  | 12.221704000 | 5.435468000  | 26.837940000 |
| C  | 11.046668000 | 7.059652000  | 27.687971000 |
| H  | 11.527292000 | 7.834967000  | 27.072086000 |
| C  | 10.046938000 | 7.414982000  | 28.610247000 |

|   |              |              |              |
|---|--------------|--------------|--------------|
| H | 9.741122000  | 8.467250000  | 28.715618000 |
| C | 9.432028000  | 6.429376000  | 29.396765000 |
| H | 8.642932000  | 6.706737000  | 30.111944000 |
| C | 8.200720000  | 4.478437000  | 31.645428000 |
| C | 8.865584000  | 5.403018000  | 32.478494000 |
| H | 9.886424000  | 5.733463000  | 32.233451000 |
| C | 8.227887000  | 5.895659000  | 33.627687000 |
| H | 8.751232000  | 6.614325000  | 34.277088000 |
| C | 6.928687000  | 5.467271000  | 33.951728000 |
| H | 6.430709000  | 5.857734000  | 34.852305000 |
| C | 6.271827000  | 4.534998000  | 33.131276000 |
| H | 5.258167000  | 4.187018000  | 33.378372000 |
| C | 6.905543000  | 4.033777000  | 31.984618000 |
| H | 6.397130000  | 3.287536000  | 31.358166000 |
| C | 3.830866000  | -0.415448000 | 28.219663000 |
| C | 2.707133000  | -1.242299000 | 28.431834000 |
| H | 2.455572000  | -1.583798000 | 29.447869000 |
| C | 1.914202000  | -1.639508000 | 27.343745000 |
| H | 1.035002000  | -2.279524000 | 27.514425000 |
| C | 2.244827000  | -1.225603000 | 26.041930000 |
| H | 1.620786000  | -1.537346000 | 25.190663000 |
| C | 3.376311000  | -0.419947000 | 25.827484000 |
| H | 3.641444000  | -0.099367000 | 24.808613000 |
| C | 4.172252000  | -0.018036000 | 26.910824000 |
| H | 5.059805000  | 0.611586000  | 26.749749000 |
| C | 3.922335000  | 0.663618000  | 30.971441000 |
| C | 2.579713000  | 1.067227000  | 30.836598000 |
| H | 2.046819000  | 0.908905000  | 29.887415000 |
| C | 1.920650000  | 1.681766000  | 31.914664000 |
| H | 0.873200000  | 2.000183000  | 31.802890000 |
| C | 2.598244000  | 1.897694000  | 33.125629000 |
| H | 2.079169000  | 2.379100000  | 33.968798000 |
| C | 3.941368000  | 1.501563000  | 33.259323000 |
| H | 4.477616000  | 1.670673000  | 34.205794000 |
| C | 4.605775000  | 0.888583000  | 32.187563000 |
| H | 5.669935000  | 0.609731000  | 32.274527000 |
| B | 10.153663000 | 2.223663000  | 30.670024000 |
| H | 9.220359000  | 1.551010000  | 31.201566000 |
| H | 10.959690000 | 2.410813000  | 31.565336000 |
| H | 10.587725000 | 1.765221000  | 29.622645000 |
| B | 6.135656000  | -1.447203000 | 30.046972000 |
| H | 7.031175000  | -0.787297000 | 30.627909000 |
| H | 6.475488000  | -1.945606000 | 28.983571000 |
| H | 5.662201000  | -2.209694000 | 30.879580000 |
| O | 9.416385000  | -0.688496000 | 30.638782000 |
| C | 9.507715000  | -1.813496000 | 30.146970000 |
| H | 8.874700000  | -2.077027000 | 29.263988000 |
| C | 10.445971000 | -2.847187000 | 30.680938000 |
| H | 9.863480000  | -3.739882000 | 30.995969000 |
| H | 11.119398000 | -3.189639000 | 29.866067000 |
| H | 11.035964000 | -2.455556000 | 31.530148000 |
| O | 8.580307000  | -0.007974000 | 28.308818000 |
| C | 8.167736000  | 0.350719000  | 27.015297000 |
| H | 9.003079000  | 0.192677000  | 26.294243000 |
| H | 7.311714000  | -0.285826000 | 26.687578000 |
| H | 7.849348000  | 1.417009000  | 26.938859000 |

## O

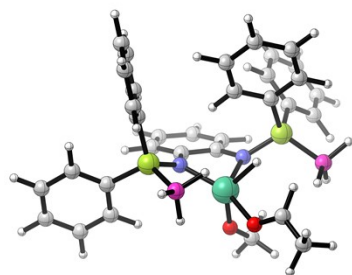

|    |              |              |              |
|----|--------------|--------------|--------------|
| Ti | 7.887641000  | 0.729901000  | 29.549168000 |
| H  | 8.530842000  | 1.217620000  | 31.054053000 |
| P  | 9.023577000  | 3.526082000  | 30.589925000 |
| P  | 4.900516000  | 0.194639000  | 29.829092000 |
| N  | 8.048466000  | 2.751647000  | 29.419970000 |
| N  | 5.977436000  | 1.309272000  | 29.218731000 |
| C  | 7.036076000  | 3.325511000  | 28.630798000 |
| C  | 5.849604000  | 2.520065000  | 28.534008000 |
| C  | 4.742386000  | 2.959322000  | 27.780832000 |
| H  | 3.848068000  | 2.323312000  | 27.702836000 |
| C  | 4.802506000  | 4.196359000  | 27.116756000 |
| H  | 3.936287000  | 4.541794000  | 26.532142000 |
| C  | 5.974401000  | 4.973703000  | 27.174689000 |
| H  | 6.029958000  | 5.927617000  | 26.629071000 |
| C  | 7.088647000  | 4.540594000  | 27.912496000 |
| H  | 8.005900000  | 5.141477000  | 27.927283000 |
| C  | 8.895211000  | 5.340508000  | 30.284247000 |
| C  | 9.951663000  | 6.019851000  | 29.643827000 |
| H  | 10.867355000 | 5.467612000  | 29.386785000 |
| C  | 9.826157000  | 7.383599000  | 29.332803000 |
| H  | 10.655221000 | 7.907783000  | 28.832432000 |
| C  | 8.648689000  | 8.077024000  | 29.660866000 |
| H  | 8.549654000  | 9.144727000  | 29.411014000 |
| C  | 7.600350000  | 7.407001000  | 30.315613000 |
| H  | 6.678701000  | 7.947794000  | 30.580500000 |
| C  | 7.723385000  | 6.046437000  | 30.630611000 |
| H  | 6.899240000  | 5.523311000  | 31.137847000 |
| C  | 8.119669000  | 3.411983000  | 32.190205000 |
| C  | 8.781035000  | 3.778063000  | 33.378013000 |
| H  | 9.834460000  | 4.094185000  | 33.340505000 |
| C  | 8.094756000  | 3.730237000  | 34.603541000 |
| H  | 8.616068000  | 4.009801000  | 35.532138000 |
| C  | 6.749572000  | 3.325765000  | 34.645693000 |
| H  | 6.215853000  | 3.286831000  | 35.608165000 |
| C  | 6.087184000  | 2.965641000  | 33.458060000 |
| H  | 5.037339000  | 2.640369000  | 33.481154000 |
| C  | 6.770355000  | 3.007434000  | 32.234501000 |
| H  | 6.269494000  | 2.695981000  | 31.306784000 |
| C  | 3.768661000  | -0.339745000 | 28.500259000 |
| C  | 2.405763000  | -0.606061000 | 28.734190000 |
| H  | 1.981183000  | -0.460452000 | 29.739454000 |
| C  | 1.590858000  | -1.044380000 | 27.677251000 |
| H  | 0.525163000  | -1.251377000 | 27.858747000 |
| C  | 2.133895000  | -1.213045000 | 26.392360000 |
| H  | 1.492089000  | -1.551612000 | 25.564763000 |
| C  | 3.494996000  | -0.943798000 | 26.160068000 |
| H  | 3.918317000  | -1.068926000 | 25.151905000 |
| C  | 4.315879000  | -0.508477000 | 27.209821000 |
| H  | 5.378324000  | -0.276012000 | 27.035793000 |
| C  | 3.856426000  | 0.931305000  | 31.131054000 |
| C  | 3.333357000  | 2.236269000  | 30.993930000 |
| H  | 3.540849000  | 2.824457000  | 30.087708000 |
| C  | 2.566002000  | 2.790221000  | 32.029228000 |
| H  | 2.168167000  | 3.810617000  | 31.925626000 |



|   |              |              |              |
|---|--------------|--------------|--------------|
| C | 2.309782000  | 2.048328000  | 33.196874000 |
| H | 1.705844000  | 2.487068000  | 34.005970000 |
| C | 2.835398000  | 0.753241000  | 33.336939000 |
| H | 2.647046000  | 0.175497000  | 34.254579000 |
| C | 3.614899000  | 0.195658000  | 32.309887000 |
| H | 4.047750000  | -0.809571000 | 32.422695000 |
| B | 10.870690000 | 2.980697000  | 30.566791000 |
| H | 10.915720000 | 1.760434000  | 30.722552000 |
| H | 11.420046000 | 3.610192000  | 31.472235000 |
| H | 11.261340000 | 3.314883000  | 29.446573000 |
| B | 6.206687000  | -1.085386000 | 30.435302000 |
| H | 6.780975000  | -1.404971000 | 29.387140000 |
| H | 5.793085000  | -2.048047000 | 31.056733000 |
| H | 6.927121000  | -0.364482000 | 31.157777000 |
| O | 9.316190000  | -0.831161000 | 30.125441000 |
| C | 10.119894000 | -0.786221000 | 31.061685000 |
| H | 10.077581000 | 0.080380000  | 31.767735000 |
| C | 11.155422000 | -1.835147000 | 31.279557000 |
| H | 12.156289000 | -1.351703000 | 31.257749000 |
| H | 11.042818000 | -2.254262000 | 32.302628000 |
| H | 11.093810000 | -2.637036000 | 30.520956000 |
| O | 8.607109000  | 0.582556000  | 27.907318000 |
| C | 9.539064000  | 1.243506000  | 27.097383000 |
| H | 10.557720000 | 0.812002000  | 27.223831000 |
| H | 9.249359000  | 1.149246000  | 26.026540000 |
| H | 9.586476000  | 2.322678000  | 27.369321000 |

### TS<sub>OP</sub>

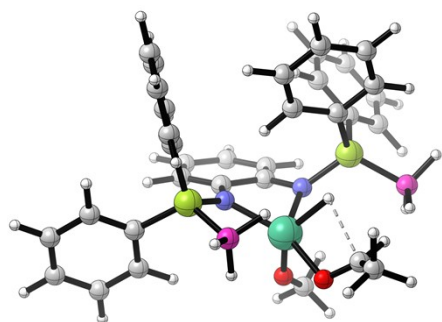

|    |              |             |              |
|----|--------------|-------------|--------------|
| Ti | 7.601761000  | 0.467660000 | 29.346224000 |
| H  | 8.433579000  | 1.089436000 | 30.743924000 |
| P  | 8.987615000  | 3.331121000 | 29.972059000 |
| P  | 4.573815000  | 0.287379000 | 29.866954000 |
| N  | 7.951161000  | 2.426576000 | 28.951528000 |
| N  | 5.729953000  | 1.198924000 | 29.084302000 |
| C  | 6.951917000  | 2.954686000 | 28.108138000 |
| C  | 5.687437000  | 2.278670000 | 28.200908000 |
| C  | 4.591108000  | 2.700115000 | 27.420441000 |
| H  | 3.631234000  | 2.168448000 | 27.491498000 |
| C  | 4.742647000  | 3.783898000 | 26.539665000 |
| H  | 3.885188000  | 4.114921000 | 25.934243000 |
| C  | 5.989894000  | 4.422313000 | 26.410016000 |
| H  | 6.114721000  | 5.250870000 | 25.696610000 |
| C  | 7.090460000  | 4.006893000 | 27.177056000 |
| H  | 8.063439000  | 4.496587000 | 27.051826000 |
| C  | 8.917610000  | 5.073680000 | 29.377221000 |
| C  | 9.987107000  | 5.592275000 | 28.618933000 |
| H  | 10.875550000 | 4.967138000 | 28.446278000 |
| C  | 9.908182000  | 6.889565000 | 28.087570000 |
| H  | 10.745965000 | 7.288926000 | 27.495172000 |
| C  | 8.765469000  | 7.676558000 | 28.313379000 |
| H  | 8.704706000  | 8.692191000 | 27.893436000 |
| C  | 7.704915000  | 7.168632000 | 29.084166000 |
| H  | 6.811168000  | 7.784571000 | 29.268201000 |

|   |              |              |              |
|---|--------------|--------------|--------------|
| C | 7.781009000  | 5.873991000  | 29.617512000 |
| H | 6.946940000  | 5.476253000  | 30.214867000 |
| C | 8.137015000  | 3.503407000  | 31.594778000 |
| C | 8.856236000  | 4.045372000  | 32.678251000 |
| H | 9.913802000  | 4.321272000  | 32.547252000 |
| C | 8.222294000  | 4.222474000  | 33.919166000 |
| H | 8.788187000  | 4.639046000  | 34.766823000 |
| C | 6.872371000  | 3.865787000  | 34.080321000 |
| H | 6.378758000  | 4.004406000  | 35.054944000 |
| C | 6.154386000  | 3.327121000  | 32.998095000 |
| H | 5.100136000  | 3.038672000  | 33.118886000 |
| C | 6.785010000  | 3.144854000  | 31.758553000 |
| H | 6.239999000  | 2.692455000  | 30.918192000 |
| C | 3.355446000  | -0.305681000 | 28.644092000 |
| C | 1.973828000  | -0.345813000 | 28.913160000 |
| H | 1.590804000  | 0.011954000  | 29.880985000 |
| C | 1.088464000  | -0.831546000 | 27.936484000 |
| H | 0.007850000  | -0.861182000 | 28.145027000 |
| C | 1.579783000  | -1.272188000 | 26.696107000 |
| H | 0.883187000  | -1.646475000 | 25.930439000 |
| C | 2.960276000  | -1.229483000 | 26.428318000 |
| H | 3.344836000  | -1.567709000 | 25.454316000 |
| C | 3.851020000  | -0.748823000 | 27.398208000 |
| H | 4.931686000  | -0.693451000 | 27.189712000 |
| C | 3.645863000  | 1.302359000  | 31.065049000 |
| C | 3.277617000  | 2.632222000  | 30.764534000 |
| H | 3.542728000  | 3.072389000  | 29.792141000 |
| C | 2.595932000  | 3.398885000  | 31.720688000 |
| H | 2.320705000  | 4.438450000  | 31.489068000 |
| C | 2.271660000  | 2.844476000  | 32.972248000 |
| H | 1.737213000  | 3.450217000  | 33.720133000 |
| C | 2.641761000  | 1.523195000  | 33.274421000 |
| H | 2.399401000  | 1.092937000  | 34.257769000 |
| C | 3.334637000  | 0.752490000  | 32.326147000 |
| H | 3.647604000  | -0.275077000 | 32.564411000 |
| B | 10.820107000 | 2.746403000  | 30.015634000 |
| H | 10.881983000 | 1.637880000  | 30.539139000 |
| H | 11.406372000 | 3.607932000  | 30.673309000 |
| H | 11.159778000 | 2.732133000  | 28.830883000 |
| B | 5.776428000  | -1.023466000 | 30.603716000 |
| H | 6.611049000  | -0.278481000 | 31.160690000 |
| H | 6.225630000  | -1.557193000 | 29.585713000 |
| H | 5.317653000  | -1.827280000 | 31.397549000 |
| O | 8.793973000  | -1.179405000 | 30.039596000 |
| C | 9.575573000  | -0.891770000 | 30.967533000 |
| H | 10.202229000 | 0.033657000  | 30.908190000 |
| C | 9.741229000  | -1.768931000 | 32.161318000 |
| H | 10.815521000 | -1.987810000 | 32.334413000 |
| H | 9.399735000  | -1.187887000 | 33.046770000 |
| H | 9.147173000  | -2.696273000 | 32.072933000 |
| O | 8.065195000  | 0.086671000  | 27.655810000 |
| C | 8.902213000  | 0.556999000  | 26.636084000 |
| H | 9.817862000  | -0.070084000 | 26.556820000 |
| H | 8.369529000  | 0.527391000  | 25.659641000 |
| H | 9.212170000  | 1.605502000  | 26.847199000 |

## P

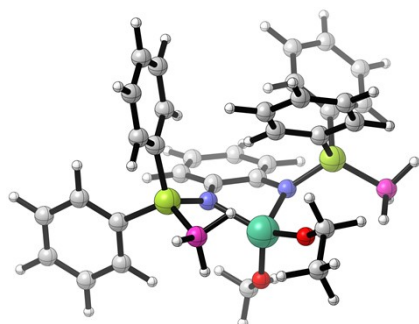

|    |              |              |              |
|----|--------------|--------------|--------------|
| Ti | 7.731543000  | 0.549894000  | 29.420592000 |
| H  | 8.606373000  | 0.593742000  | 32.704929000 |
| P  | 9.113845000  | 3.435245000  | 29.825040000 |
| P  | 4.657643000  | 0.392335000  | 29.752917000 |
| N  | 8.080720000  | 2.431169000  | 28.875782000 |
| N  | 5.857894000  | 1.195610000  | 28.920676000 |
| C  | 7.140662000  | 2.900307000  | 27.932662000 |
| C  | 5.871652000  | 2.230951000  | 27.982700000 |
| C  | 4.830878000  | 2.615623000  | 27.113356000 |
| H  | 3.864508000  | 2.092407000  | 27.154271000 |
| C  | 5.046429000  | 3.654879000  | 26.191661000 |
| H  | 4.231629000  | 3.957524000  | 25.516372000 |
| C  | 6.300992000  | 4.287306000  | 26.112580000 |
| H  | 6.471870000  | 5.084405000  | 25.373536000 |
| C  | 7.347974000  | 3.906562000  | 26.968203000 |
| H  | 8.329544000  | 4.392394000  | 26.896143000 |
| C  | 8.628917000  | 5.165100000  | 29.442870000 |
| C  | 9.587082000  | 6.039202000  | 28.893594000 |
| H  | 10.612862000 | 5.677814000  | 28.727649000 |
| C  | 9.224433000  | 7.354525000  | 28.557754000 |
| H  | 9.975903000  | 8.036514000  | 28.131345000 |
| C  | 7.907234000  | 7.796911000  | 28.764445000 |
| H  | 7.622979000  | 8.825440000  | 28.494428000 |
| C  | 6.951835000  | 6.927298000  | 29.321150000 |
| H  | 5.920338000  | 7.273249000  | 29.487329000 |
| C  | 7.311050000  | 5.617320000  | 29.665000000 |
| H  | 6.562089000  | 4.939974000  | 30.100570000 |
| C  | 8.433324000  | 3.242296000  | 31.525547000 |
| C  | 9.261952000  | 3.501588000  | 32.634705000 |
| H  | 10.309027000 | 3.797723000  | 32.472016000 |
| C  | 8.752356000  | 3.360242000  | 33.936224000 |
| H  | 9.405613000  | 3.555051000  | 34.800460000 |
| C  | 7.420080000  | 2.959252000  | 34.137914000 |
| H  | 7.028876000  | 2.840068000  | 35.160051000 |
| C  | 6.590166000  | 2.702099000  | 33.032783000 |
| H  | 5.546744000  | 2.383310000  | 33.177036000 |
| C  | 7.096657000  | 2.845600000  | 31.732478000 |
| H  | 6.454976000  | 2.620699000  | 30.868085000 |
| C  | 3.431908000  | -0.256249000 | 28.566919000 |
| C  | 2.067587000  | 0.090723000  | 28.609961000 |
| H  | 1.696350000  | 0.760374000  | 29.400731000 |
| C  | 1.189859000  | -0.411918000 | 27.634781000 |
| H  | 0.124453000  | -0.136907000 | 27.664838000 |
| C  | 1.671782000  | -1.256835000 | 26.621093000 |
| H  | 0.982346000  | -1.647339000 | 25.857061000 |
| C  | 3.034713000  | -1.604369000 | 26.579754000 |
| H  | 3.412096000  | -2.265772000 | 25.784707000 |
| C  | 3.915880000  | -1.107694000 | 27.549642000 |
| H  | 4.985190000  | -1.369568000 | 27.520956000 |
| C  | 3.768698000  | 1.552347000  | 30.849226000 |
| C  | 3.709171000  | 2.931204000  | 30.553079000 |
| H  | 4.145645000  | 3.313071000  | 29.618053000 |
| C  | 3.112450000  | 3.814923000  | 31.465171000 |
| H  | 3.078126000  | 4.891107000  | 31.237287000 |

|   |              |              |              |
|---|--------------|--------------|--------------|
| C | 2.566995000  | 3.330597000  | 32.667174000 |
| H | 2.105078000  | 4.028440000  | 33.382064000 |
| C | 2.620858000  | 1.957249000  | 32.961465000 |
| H | 2.203199000  | 1.576999000  | 33.905963000 |
| C | 3.226670000  | 1.068089000  | 32.058818000 |
| H | 3.299985000  | -0.003633000 | 32.300071000 |
| B | 10.987293000 | 3.105213000  | 29.662190000 |
| H | 11.136358000 | 1.927772000  | 29.972334000 |
| H | 11.521621000 | 3.900581000  | 30.439339000 |
| H | 11.238987000 | 3.342958000  | 28.479734000 |
| B | 5.800950000  | -0.836915000 | 30.695929000 |
| H | 6.554404000  | -0.010276000 | 31.241327000 |
| H | 6.380174000  | -1.471598000 | 29.809079000 |
| H | 5.275312000  | -1.543801000 | 31.537901000 |
| O | 8.947579000  | 0.267678000  | 30.691718000 |
| C | 9.343754000  | 0.098630000  | 32.031966000 |
| H | 10.313635000 | 0.630448000  | 32.157353000 |
| C | 9.478699000  | -1.381900000 | 32.370088000 |
| H | 10.214904000 | -1.871255000 | 31.701791000 |
| H | 9.815568000  | -1.508697000 | 33.419279000 |
| H | 8.503653000  | -1.896728000 | 32.251824000 |
| O | 8.171242000  | -0.368058000 | 27.947172000 |
| C | 7.947250000  | -0.185967000 | 26.571112000 |
| H | 8.652851000  | 0.568808000  | 26.159756000 |
| H | 8.110853000  | -1.146720000 | 26.035110000 |
| H | 6.910034000  | 0.164732000  | 26.365186000 |

**B**

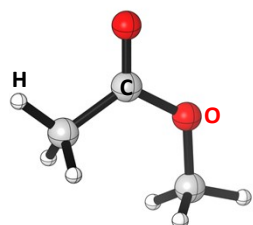

|   |              |              |              |
|---|--------------|--------------|--------------|
| O | 8.857386000  | 0.051745000  | 29.843501000 |
| C | 8.819225000  | -0.597202000 | 28.821755000 |
| C | 9.993885000  | -1.392941000 | 28.274686000 |
| H | 10.847090000 | -1.266166000 | 28.963384000 |
| H | 9.751263000  | -2.472042000 | 28.187061000 |
| H | 10.285980000 | -1.039547000 | 27.264545000 |
| O | 7.652216000  | -0.622724000 | 28.103000000 |
| C | 7.542361000  | -1.371579000 | 26.894709000 |
| H | 8.246420000  | -1.012646000 | 26.113518000 |
| H | 7.707255000  | -2.458620000 | 27.056851000 |
| H | 6.508275000  | -1.222172000 | 26.531856000 |

## S14.2 XYZ coordinates of the molecules present in Figure S85

**TS<sub>DE</sub>**

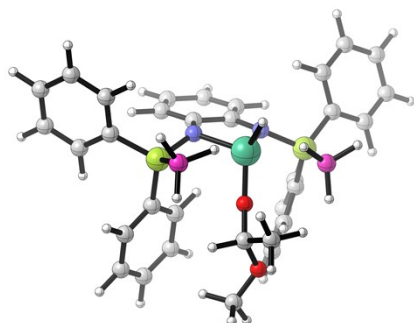

|    |              |              |              |
|----|--------------|--------------|--------------|
| Ti | 7.196798000  | 0.866345000  | 31.428401000 |
| H  | 7.308270000  | 0.260506000  | 33.025507000 |
| P  | 8.940360000  | 3.263302000  | 31.021940000 |
| P  | 4.596893000  | 0.183458000  | 30.154375000 |
| N  | 7.325905000  | 2.899732000  | 31.363579000 |
| N  | 5.312465000  | 1.477913000  | 30.959360000 |
| C  | 6.192164000  | 3.659573000  | 31.024626000 |
| C  | 5.040663000  | 2.848172000  | 30.796707000 |
| C  | 3.814103000  | 3.446550000  | 30.456731000 |
| H  | 2.927924000  | 2.824928000  | 30.278953000 |
| C  | 3.731652000  | 4.847004000  | 30.339234000 |
| H  | 2.770799000  | 5.309370000  | 30.066988000 |
| C  | 4.860720000  | 5.648333000  | 30.569676000 |
| H  | 4.790166000  | 6.743560000  | 30.485012000 |
| C  | 6.091836000  | 5.059429000  | 30.917030000 |
| H  | 6.968065000  | 5.690613000  | 31.117818000 |
| C  | 9.100503000  | 3.417208000  | 29.208489000 |
| C  | 9.707102000  | 2.370097000  | 28.483134000 |
| H  | 10.124861000 | 1.502018000  | 29.012525000 |
| C  | 9.747659000  | 2.424957000  | 27.081042000 |
| H  | 10.235503000 | 1.612472000  | 26.522894000 |
| C  | 9.171313000  | 3.506807000  | 26.395569000 |
| H  | 9.208157000  | 3.544907000  | 25.295400000 |
| C  | 8.547920000  | 4.542351000  | 27.114651000 |
| H  | 8.090295000  | 5.390614000  | 26.582802000 |
| C  | 8.515719000  | 4.503835000  | 28.516698000 |
| H  | 8.038607000  | 5.321318000  | 29.074179000 |
| C  | 9.360949000  | 4.898787000  | 31.719828000 |
| C  | 10.226273000 | 5.795109000  | 31.063023000 |
| H  | 10.632400000 | 5.543751000  | 30.072146000 |
| C  | 10.563705000 | 7.013292000  | 31.676403000 |
| H  | 11.236577000 | 7.715777000  | 31.161021000 |
| C  | 10.042633000 | 7.335496000  | 32.939910000 |
| H  | 10.305813000 | 8.292838000  | 33.414643000 |
| C  | 9.186774000  | 6.434809000  | 33.600137000 |
| H  | 8.780504000  | 6.684398000  | 34.591566000 |
| C  | 8.849481000  | 5.215968000  | 32.996457000 |
| H  | 8.175427000  | 4.506057000  | 33.501935000 |
| C  | 4.995704000  | 0.349417000  | 28.374974000 |
| C  | 4.694500000  | -0.708312000 | 27.491993000 |
| H  | 4.213249000  | -1.623013000 | 27.872423000 |
| C  | 5.012399000  | -0.596303000 | 26.129246000 |
| H  | 4.775921000  | -1.423885000 | 25.443043000 |
| C  | 5.638022000  | 0.566738000  | 25.645526000 |
| H  | 5.890804000  | 0.651356000  | 24.577333000 |
| C  | 5.954900000  | 1.612973000  | 26.528381000 |
| H  | 6.468197000  | 2.515227000  | 26.164829000 |
| C  | 5.640515000  | 1.506435000  | 27.891960000 |
| H  | 5.909265000  | 2.319661000  | 28.579916000 |
| C  | 2.770455000  | 0.295522000  | 30.251303000 |
| C  | 1.962002000  | 0.565429000  | 29.128482000 |
| H  | 2.420443000  | 0.679712000  | 28.135400000 |
| C  | 0.574034000  | 0.707514000  | 29.284655000 |
| H  | -0.054407000 | 0.919504000  | 28.406335000 |

|   |              |              |              |
|---|--------------|--------------|--------------|
| C | -0.008426000 | 0.589015000  | 30.557743000 |
| H | -1.096143000 | 0.709018000  | 30.679340000 |
| C | 0.797551000  | 0.318851000  | 31.677998000 |
| H | 0.342627000  | 0.224019000  | 32.675748000 |
| C | 2.183089000  | 0.166601000  | 31.527822000 |
| H | 2.817376000  | -0.044436000 | 32.402045000 |
| B | 9.867080000  | 1.804203000  | 31.883089000 |
| H | 8.963302000  | 1.026222000  | 32.303954000 |
| H | 10.336322000 | 2.273984000  | 32.909794000 |
| H | 10.667423000 | 1.258609000  | 31.141569000 |
| B | 5.347884000  | -1.334705000 | 31.079986000 |
| H | 6.273202000  | -0.862488000 | 31.800321000 |
| H | 5.741763000  | -2.188380000 | 30.302831000 |
| H | 4.507014000  | -1.703891000 | 31.889726000 |
| O | 7.948349000  | 0.037879000  | 30.029065000 |
| C | 8.567571000  | -1.187546000 | 29.640344000 |
| H | 7.724686000  | -1.892958000 | 29.434453000 |
| O | 9.324696000  | -1.000219000 | 28.477994000 |
| C | 8.527212000  | -0.787101000 | 27.322994000 |
| H | 7.794530000  | -1.615475000 | 27.177098000 |
| H | 7.966473000  | 0.167981000  | 27.384567000 |
| H | 9.208193000  | -0.753687000 | 26.451137000 |
| C | 9.478019000  | -1.720781000 | 30.733549000 |
| H | 8.894864000  | -1.894143000 | 31.658744000 |
| H | 9.933087000  | -2.675886000 | 30.408056000 |
| H | 10.276452000 | -0.985914000 | 30.945624000 |

## E

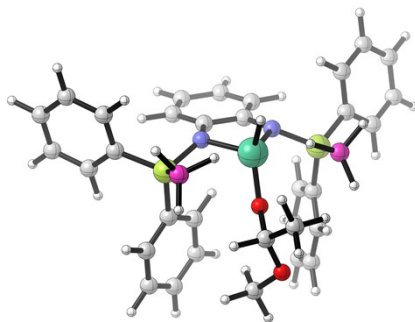

|    |              |             |              |
|----|--------------|-------------|--------------|
| Ti | 7.196798000  | 0.866345000 | 31.428401000 |
| H  | 7.308270000  | 0.260506000 | 33.025507000 |
| P  | 8.940360000  | 3.263302000 | 31.021940000 |
| P  | 4.596893000  | 0.183458000 | 30.154375000 |
| N  | 7.325905000  | 2.899732000 | 31.363579000 |
| N  | 5.312465000  | 1.477913000 | 30.959360000 |
| C  | 6.192164000  | 3.659573000 | 31.024626000 |
| C  | 5.040663000  | 2.848172000 | 30.796707000 |
| C  | 3.814103000  | 3.446550000 | 30.456731000 |
| H  | 2.927924000  | 2.824928000 | 30.278953000 |
| C  | 3.731652000  | 4.847004000 | 30.339234000 |
| H  | 2.770799000  | 5.309370000 | 30.066988000 |
| C  | 4.860720000  | 5.648333000 | 30.569676000 |
| H  | 4.790166000  | 6.743560000 | 30.485012000 |
| C  | 6.091836000  | 5.059429000 | 30.917030000 |
| H  | 6.968065000  | 5.690613000 | 31.117818000 |
| C  | 9.100503000  | 3.417208000 | 29.208489000 |
| C  | 9.707102000  | 2.370097000 | 28.483134000 |
| H  | 10.124861000 | 1.502018000 | 29.012525000 |
| C  | 9.747659000  | 2.424957000 | 27.081042000 |
| H  | 10.235503000 | 1.612472000 | 26.522894000 |
| C  | 9.171313000  | 3.506807000 | 26.395569000 |
| H  | 9.208157000  | 3.544907000 | 25.295400000 |
| C  | 8.547920000  | 4.542351000 | 27.114651000 |
| H  | 8.090295000  | 5.390614000 | 26.582802000 |
| C  | 8.515719000  | 4.503835000 | 28.516698000 |

|   |              |              |              |
|---|--------------|--------------|--------------|
| H | 8.038607000  | 5.321318000  | 29.074179000 |
| C | 9.360949000  | 4.898787000  | 31.719828000 |
| C | 10.226273000 | 5.795109000  | 31.063023000 |
| H | 10.632400000 | 5.543751000  | 30.072146000 |
| C | 10.563705000 | 7.013292000  | 31.676403000 |
| H | 11.236577000 | 7.715777000  | 31.161021000 |
| C | 10.042633000 | 7.335496000  | 32.939910000 |
| H | 10.305813000 | 8.292838000  | 33.414643000 |
| C | 9.186774000  | 6.434809000  | 33.600137000 |
| H | 8.780504000  | 6.684398000  | 34.591566000 |
| C | 8.849481000  | 5.215968000  | 32.996457000 |
| H | 8.175427000  | 4.506057000  | 33.501935000 |
| C | 4.995704000  | 0.349417000  | 28.374974000 |
| C | 4.694500000  | -0.708312000 | 27.491993000 |
| H | 4.213249000  | -1.623013000 | 27.872423000 |
| C | 5.012399000  | -0.596303000 | 26.129246000 |
| H | 4.775921000  | -1.423885000 | 25.443043000 |
| C | 5.638022000  | 0.566738000  | 25.645526000 |
| H | 5.890804000  | 0.651356000  | 24.577333000 |
| C | 5.954900000  | 1.612973000  | 26.528381000 |
| H | 6.468197000  | 2.515227000  | 26.164829000 |
| C | 5.640515000  | 1.506435000  | 27.891960000 |
| H | 5.909265000  | 2.319661000  | 28.579916000 |
| C | 2.770455000  | 0.295522000  | 30.251303000 |
| C | 1.962002000  | 0.565429000  | 29.128482000 |
| H | 2.420443000  | 0.679712000  | 28.135400000 |
| C | 0.574034000  | 0.707514000  | 29.284655000 |
| H | -0.054407000 | 0.919504000  | 28.406335000 |
| C | -0.008426000 | 0.589015000  | 30.557743000 |
| H | -1.096143000 | 0.709018000  | 30.679340000 |
| C | 0.797551000  | 0.318851000  | 31.677998000 |
| H | 0.342627000  | 0.224019000  | 32.675748000 |
| C | 2.183089000  | 0.166601000  | 31.527822000 |
| H | 2.817376000  | -0.044436000 | 32.402045000 |
| B | 9.867080000  | 1.804203000  | 31.883089000 |
| H | 8.963302000  | 1.026222000  | 32.303954000 |
| H | 10.336322000 | 2.273984000  | 32.909794000 |
| H | 10.667423000 | 1.258609000  | 31.141569000 |
| B | 5.347884000  | -1.334705000 | 31.079986000 |
| H | 6.273202000  | -0.862488000 | 31.800321000 |
| H | 5.741763000  | -2.188380000 | 30.302831000 |
| H | 4.507014000  | -1.703891000 | 31.889726000 |
| O | 7.948349000  | 0.037879000  | 30.029065000 |
| C | 8.567571000  | -1.187546000 | 29.640344000 |
| H | 7.724686000  | -1.892958000 | 29.434453000 |
| O | 9.324696000  | -1.000219000 | 28.477994000 |
| C | 8.527212000  | -0.787101000 | 27.322994000 |
| H | 7.794530000  | -1.615475000 | 27.177098000 |
| H | 7.966473000  | 0.167981000  | 27.384567000 |
| H | 9.208193000  | -0.753687000 | 26.451137000 |
| C | 9.478019000  | -1.720781000 | 30.733549000 |
| H | 8.894864000  | -1.894143000 | 31.658744000 |
| H | 9.933087000  | -2.675886000 | 30.408056000 |
| H | 10.276452000 | -0.985914000 | 30.945624000 |

**TS<sub>EF</sub>**

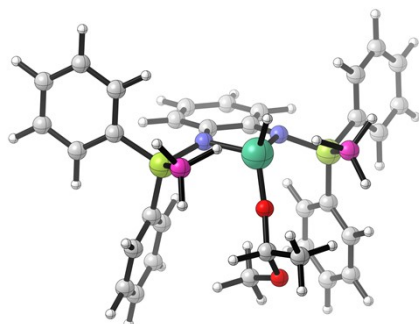

|    |              |              |              |
|----|--------------|--------------|--------------|
| Ti | 7.153455000  | 1.161232000  | 30.869563000 |
| H  | 7.043359000  | 0.827047000  | 32.548053000 |
| P  | 9.174296000  | 3.320388000  | 30.343148000 |
| P  | 4.548253000  | 0.412270000  | 29.545902000 |
| N  | 7.501433000  | 3.111073000  | 30.369097000 |
| N  | 5.427121000  | 1.778057000  | 29.973874000 |
| C  | 6.515099000  | 3.843821000  | 29.689989000 |
| C  | 5.326698000  | 3.084603000  | 29.468409000 |
| C  | 4.223519000  | 3.676123000  | 28.823473000 |
| H  | 3.307991000  | 3.092935000  | 28.656128000 |
| C  | 4.302595000  | 5.012824000  | 28.389457000 |
| H  | 3.438075000  | 5.467672000  | 27.882717000 |
| C  | 5.469876000  | 5.762216000  | 28.608636000 |
| H  | 5.526360000  | 6.809122000  | 28.275253000 |
| C  | 6.575128000  | 5.184914000  | 29.262660000 |
| H  | 7.480711000  | 5.778466000  | 29.446571000 |
| C  | 9.800954000  | 3.032689000  | 28.648595000 |
| C  | 10.885292000 | 2.154365000  | 28.453555000 |
| H  | 11.331560000 | 1.646254000  | 29.319479000 |
| C  | 11.375533000 | 1.919506000  | 27.159276000 |
| H  | 12.220332000 | 1.229753000  | 27.014691000 |
| C  | 10.777615000 | 2.545129000  | 26.054497000 |
| H  | 11.161988000 | 2.357206000  | 25.040215000 |
| C  | 9.680032000  | 3.405063000  | 26.242057000 |
| H  | 9.200985000  | 3.887912000  | 25.376857000 |
| C  | 9.191570000  | 3.653065000  | 27.532597000 |
| H  | 8.331779000  | 4.323341000  | 27.673036000 |
| C  | 9.565693000  | 5.068415000  | 30.715833000 |
| C  | 10.416965000 | 5.845986000  | 29.907407000 |
| H  | 10.867351000 | 5.409754000  | 29.003640000 |
| C  | 10.680225000 | 7.181854000  | 30.255010000 |
| H  | 11.344758000 | 7.789507000  | 29.621613000 |
| C  | 10.095510000 | 7.740783000  | 31.403104000 |
| H  | 10.301668000 | 8.788234000  | 31.670712000 |
| C  | 9.249023000  | 6.961646000  | 32.213275000 |
| H  | 8.792175000  | 7.397532000  | 33.114421000 |
| C  | 8.987311000  | 5.626961000  | 31.876159000 |
| H  | 8.322273000  | 5.012498000  | 32.502917000 |
| C  | 4.840629000  | -0.007480000 | 27.788262000 |
| C  | 4.761022000  | -1.361093000 | 27.398000000 |
| H  | 4.540732000  | -2.133270000 | 28.150656000 |
| C  | 4.976014000  | -1.720548000 | 26.057496000 |
| H  | 4.912524000  | -2.777704000 | 25.758022000 |
| C  | 5.285301000  | -0.734511000 | 25.105452000 |
| H  | 5.462905000  | -1.018637000 | 24.056967000 |
| C  | 5.379182000  | 0.612921000  | 25.495364000 |
| H  | 5.632056000  | 1.386365000  | 24.754275000 |
| C  | 5.156786000  | 0.980531000  | 26.831648000 |
| H  | 5.238580000  | 2.035052000  | 27.131167000 |
| C  | 2.761065000  | 0.795426000  | 29.652476000 |
| C  | 1.866886000  | 0.555353000  | 28.591306000 |
| H  | 2.235563000  | 0.122716000  | 27.649244000 |
| C  | 0.508225000  | 0.882041000  | 28.736513000 |
| H  | -0.189770000 | 0.693728000  | 27.906402000 |



|   |              |              |              |
|---|--------------|--------------|--------------|
| C | 0.044299000  | 1.452066000  | 29.933659000 |
| H | -1.019030000 | 1.715236000  | 30.042022000 |
| C | 0.938158000  | 1.689738000  | 30.994027000 |
| H | 0.575533000  | 2.137607000  | 31.931701000 |
| C | 2.293273000  | 1.358900000  | 30.858835000 |
| H | 2.999375000  | 1.549779000  | 31.681890000 |
| B | 9.744160000  | 2.070168000  | 31.697872000 |
| H | 8.698144000  | 1.443294000  | 32.041016000 |
| H | 10.007910000 | 2.734210000  | 32.691519000 |
| H | 10.626690000 | 1.320183000  | 31.317134000 |
| B | 5.191986000  | -0.908235000 | 30.799571000 |
| H | 5.988026000  | -0.273327000 | 31.555450000 |
| H | 5.718006000  | -1.850368000 | 30.228432000 |
| H | 4.271430000  | -1.194900000 | 31.552033000 |
| O | 8.047281000  | 0.034892000  | 29.848040000 |
| C | 8.646233000  | -1.062253000 | 29.187877000 |
| H | 7.799582000  | -1.741935000 | 28.910379000 |
| O | 9.318041000  | -0.634746000 | 28.038098000 |
| C | 8.457291000  | -0.058269000 | 27.067259000 |
| H | 7.646491000  | -0.763153000 | 26.771604000 |
| H | 7.988976000  | 0.876515000  | 27.441746000 |
| H | 9.075310000  | 0.184211000  | 26.183822000 |
| C | 9.638954000  | -1.745053000 | 30.111798000 |
| H | 9.120278000  | -2.104288000 | 31.020156000 |
| H | 10.111521000 | -2.602293000 | 29.594737000 |
| H | 10.418197000 | -1.017889000 | 30.408955000 |

## F

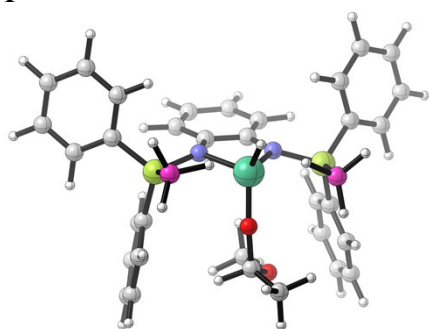

|    |              |              |              |
|----|--------------|--------------|--------------|
| Ti | 7.600924000  | 0.779210000  | 31.015301000 |
| H  | 7.641099000  | 0.701172000  | 32.723595000 |
| P  | 9.265432000  | 3.226492000  | 30.211726000 |
| P  | 5.033431000  | -0.489902000 | 30.011324000 |
| N  | 7.684342000  | 2.636456000  | 30.164472000 |
| N  | 5.786966000  | 1.015020000  | 30.083610000 |
| C  | 6.605639000  | 3.109932000  | 29.403178000 |
| C  | 5.535456000  | 2.166769000  | 29.326099000 |
| C  | 4.374671000  | 2.489262000  | 28.594689000 |
| H  | 3.540637000  | 1.776168000  | 28.541812000 |
| C  | 4.267348000  | 3.741559000  | 27.960970000 |
| H  | 3.355193000  | 3.982712000  | 27.394659000 |
| C  | 5.302546000  | 4.683500000  | 28.070325000 |
| H  | 5.207036000  | 5.672137000  | 27.597196000 |
| C  | 6.467050000  | 4.373455000  | 28.797438000 |
| H  | 7.257755000  | 5.125858000  | 28.921224000 |
| C  | 10.058896000 | 3.159122000  | 28.562568000 |
| C  | 11.209318000 | 2.359339000  | 28.403891000 |
| H  | 11.610757000 | 1.817324000  | 29.270085000 |
| C  | 11.821733000 | 2.243572000  | 27.146366000 |
| H  | 12.717966000 | 1.615733000  | 27.034652000 |
| C  | 11.283769000 | 2.911867000  | 26.035654000 |
| H  | 11.760123000 | 2.813566000  | 25.048018000 |
| C  | 10.134492000 | 3.708839000  | 26.185730000 |
| H  | 9.706532000  | 4.232575000  | 25.317599000 |

|   |              |              |              |
|---|--------------|--------------|--------------|
| C | 9.525780000  | 3.838877000  | 27.442129000 |
| H | 8.626003000  | 4.458479000  | 27.543108000 |
| C | 9.185929000  | 5.001940000  | 30.649186000 |
| C | 10.031712000 | 5.964614000  | 30.064510000 |
| H | 10.747368000 | 5.667245000  | 29.282933000 |
| C | 9.951752000  | 7.305708000  | 30.475918000 |
| H | 10.610519000 | 8.057823000  | 30.015685000 |
| C | 9.033061000  | 7.685996000  | 31.467887000 |
| H | 8.971569000  | 8.737684000  | 31.787087000 |
| C | 8.191973000  | 6.723408000  | 32.054725000 |
| H | 7.471344000  | 7.019820000  | 32.832369000 |
| C | 8.267971000  | 5.383505000  | 31.650521000 |
| H | 7.607633000  | 4.624182000  | 32.097937000 |
| C | 5.433424000  | -1.283373000 | 28.411026000 |
| C | 6.063806000  | -2.544695000 | 28.407815000 |
| H | 6.272909000  | -3.041612000 | 29.366288000 |
| C | 6.429429000  | -3.147930000 | 27.193118000 |
| H | 6.918049000  | -4.133675000 | 27.198676000 |
| C | 6.174756000  | -2.492995000 | 25.977100000 |
| H | 6.465332000  | -2.963566000 | 25.025678000 |
| C | 5.551431000  | -1.232092000 | 25.976168000 |
| H | 5.357592000  | -0.713020000 | 25.025363000 |
| C | 5.177614000  | -0.627217000 | 27.184965000 |
| H | 4.703705000  | 0.363907000  | 27.174583000 |
| C | 3.217925000  | -0.262249000 | 30.008707000 |
| C | 2.366982000  | -0.927631000 | 29.105360000 |
| H | 2.789702000  | -1.601250000 | 28.344493000 |
| C | 0.978427000  | -0.721121000 | 29.172087000 |
| H | 0.315135000  | -1.241743000 | 28.464500000 |
| C | 0.440667000  | 0.148628000  | 30.134743000 |
| H | -0.646798000 | 0.315553000  | 30.179867000 |
| C | 1.290618000  | 0.807165000  | 31.042185000 |
| H | 0.869641000  | 1.487948000  | 31.797962000 |
| C | 2.675210000  | 0.599654000  | 30.986062000 |
| H | 3.347403000  | 1.115874000  | 31.688959000 |
| B | 10.053671000 | 2.094659000  | 31.562591000 |
| H | 9.057458000  | 1.509694000  | 32.089833000 |
| H | 10.452510000 | 2.805070000  | 32.474725000 |
| H | 10.875474000 | 1.316927000  | 31.113528000 |
| B | 5.721875000  | -1.346719000 | 31.593432000 |
| H | 6.615235000  | -0.565724000 | 32.042708000 |
| H | 6.164310000  | -2.466134000 | 31.395608000 |
| H | 4.832482000  | -1.269848000 | 32.431303000 |
| O | 8.552591000  | -0.466361000 | 30.190429000 |
| C | 9.315011000  | -1.110491000 | 29.188006000 |
| H | 8.645207000  | -1.891940000 | 28.749020000 |
| O | 9.710592000  | -0.209801000 | 28.192859000 |
| C | 8.641082000  | 0.319887000  | 27.422123000 |
| H | 8.052455000  | -0.488702000 | 26.934178000 |
| H | 7.948357000  | 0.933249000  | 28.040041000 |
| H | 9.092274000  | 0.970849000  | 26.650844000 |
| C | 10.559352000 | -1.720573000 | 29.810979000 |
| H | 10.272332000 | -2.440761000 | 30.599810000 |
| H | 11.156300000 | -2.238205000 | 29.034886000 |
| H | 11.167803000 | -0.915670000 | 30.266893000 |

TSFG

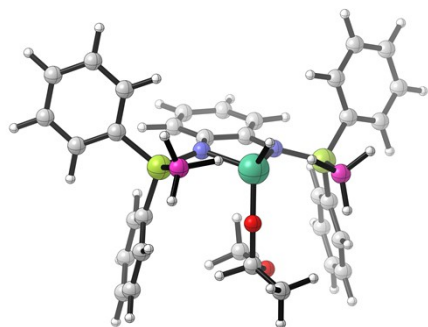

|    |              |              |              |
|----|--------------|--------------|--------------|
| Ti | 7.635905000  | 0.773861000  | 30.991395000 |
| H  | 7.705414000  | 0.674948000  | 32.696851000 |
| P  | 9.279790000  | 3.253316000  | 30.217679000 |
| P  | 5.045429000  | -0.497041000 | 30.028346000 |
| N  | 7.711840000  | 2.630785000  | 30.131477000 |
| N  | 5.823170000  | 0.996565000  | 30.049794000 |
| C  | 6.646283000  | 3.079563000  | 29.337912000 |
| C  | 5.581082000  | 2.130085000  | 29.262612000 |
| C  | 4.432956000  | 2.430971000  | 28.502790000 |
| H  | 3.601034000  | 1.715303000  | 28.453714000 |
| C  | 4.332939000  | 3.666716000  | 27.836448000 |
| H  | 3.430265000  | 3.890666000  | 27.248232000 |
| C  | 5.363111000  | 4.614274000  | 27.941338000 |
| H  | 5.273061000  | 5.591093000  | 27.443176000 |
| C  | 6.514326000  | 4.326065000  | 28.697669000 |
| H  | 7.295845000  | 5.086846000  | 28.821550000 |
| C  | 10.103245000 | 3.235230000  | 28.580984000 |
| C  | 11.141692000 | 2.305612000  | 28.366457000 |
| H  | 11.456960000 | 1.653848000  | 29.190590000 |
| C  | 11.749354000 | 2.202945000  | 27.105546000 |
| H  | 12.554393000 | 1.469479000  | 26.949576000 |
| C  | 11.319689000 | 3.018326000  | 26.047024000 |
| H  | 11.790492000 | 2.930415000  | 25.055781000 |
| C  | 10.290341000 | 3.954245000  | 26.255429000 |
| H  | 9.953910000  | 4.600711000  | 25.430670000 |
| C  | 9.688515000  | 4.069201000  | 27.516355000 |
| H  | 8.896333000  | 4.813164000  | 27.667626000 |
| C  | 9.154293000  | 5.016937000  | 30.690218000 |
| C  | 10.078098000 | 5.981011000  | 30.239962000 |
| H  | 10.879424000 | 5.692590000  | 29.542846000 |
| C  | 9.968827000  | 7.311031000  | 30.678519000 |
| H  | 10.688545000 | 8.064058000  | 30.322722000 |
| C  | 8.943267000  | 7.679486000  | 31.565456000 |
| H  | 8.858376000  | 8.722929000  | 31.905402000 |
| C  | 8.025994000  | 6.715380000  | 32.020667000 |
| H  | 7.222195000  | 7.002402000  | 32.715942000 |
| C  | 8.130817000  | 5.385836000  | 31.588314000 |
| H  | 7.414728000  | 4.624149000  | 31.933688000 |
| C  | 5.413302000  | -1.349803000 | 28.450426000 |
| C  | 6.049863000  | -2.607768000 | 28.481910000 |
| H  | 6.276296000  | -3.069638000 | 29.453807000 |
| C  | 6.398877000  | -3.252534000 | 27.283789000 |
| H  | 6.891838000  | -4.235609000 | 27.317002000 |
| C  | 6.122246000  | -2.642784000 | 26.049292000 |
| H  | 6.400546000  | -3.145750000 | 25.110867000 |
| C  | 5.490936000  | -1.386461000 | 26.013347000 |
| H  | 5.277910000  | -0.903286000 | 25.047848000 |
| C  | 5.132373000  | -0.741086000 | 27.205694000 |
| H  | 4.651837000  | 0.245814000  | 27.167474000 |
| C  | 3.234644000  | -0.236998000 | 30.037068000 |
| C  | 2.359486000  | -0.956770000 | 29.201102000 |
| H  | 2.760164000  | -1.690741000 | 28.485268000 |
| C  | 0.974769000  | -0.729101000 | 29.278017000 |
| H  | 0.292360000  | -1.292573000 | 28.623439000 |

|   |              |              |              |
|---|--------------|--------------|--------------|
| C | 0.465211000  | 0.215952000  | 30.183287000 |
| H | -0.619357000 | 0.398541000  | 30.236247000 |
| C | 1.339500000  | 0.929689000  | 31.023195000 |
| H | 0.940406000  | 1.670495000  | 31.733001000 |
| C | 2.720393000  | 0.701517000  | 30.957399000 |
| H | 3.412212000  | 1.260581000  | 31.606506000 |
| B | 10.068392000 | 2.105494000  | 31.553334000 |
| H | 9.070990000  | 1.520052000  | 32.080564000 |
| H | 10.477167000 | 2.801236000  | 32.471909000 |
| H | 10.884230000 | 1.327712000  | 31.091132000 |
| B | 5.737980000  | -1.318520000 | 31.625816000 |
| H | 6.649376000  | -0.541420000 | 32.047472000 |
| H | 6.164787000  | -2.448574000 | 31.455893000 |
| H | 4.860050000  | -1.207516000 | 32.471870000 |
| O | 8.573640000  | -0.476818000 | 30.155824000 |
| C | 9.275578000  | -1.114582000 | 29.105314000 |
| H | 8.570838000  | -1.871485000 | 28.678110000 |
| O | 9.651327000  | -0.202427000 | 28.112279000 |
| C | 8.565075000  | 0.372086000  | 27.397932000 |
| H | 7.959724000  | -0.407465000 | 26.883354000 |
| H | 7.894272000  | 0.955803000  | 28.065415000 |
| H | 8.999591000  | 1.061007000  | 26.650019000 |
| C | 10.529726000 | -1.768546000 | 29.660850000 |
| H | 10.257334000 | -2.500683000 | 30.443893000 |
| H | 11.081177000 | -2.281347000 | 28.848838000 |
| H | 11.177759000 | -0.991720000 | 30.111027000 |

### TS<sub>GH</sub>

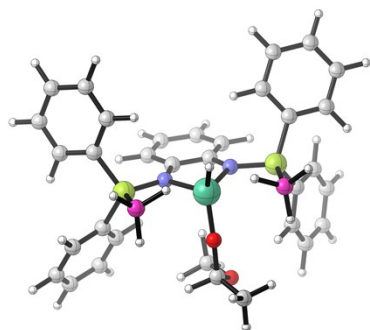

|    |              |              |              |
|----|--------------|--------------|--------------|
| Ti | 0.332628000  | -1.525050000 | 1.276839000  |
| H  | 0.202207000  | -1.747161000 | 2.970901000  |
| P  | 2.847079000  | 0.264232000  | 1.120716000  |
| P  | -2.608961000 | -1.272667000 | 0.350953000  |
| N  | 1.216794000  | 0.220384000  | 0.696172000  |
| N  | -1.138585000 | -0.463829000 | 0.318299000  |
| C  | 0.514571000  | 1.150827000  | -0.083287000 |
| C  | -0.849046000 | 0.775007000  | -0.269790000 |
| C  | -1.726059000 | 1.633846000  | -0.957834000 |
| H  | -2.785663000 | 1.365373000  | -1.070189000 |
| C  | -1.240443000 | 2.842951000  | -1.491197000 |
| H  | -1.929490000 | 3.511862000  | -2.028593000 |
| C  | 0.109804000  | 3.197024000  | -1.335799000 |
| H  | 0.485761000  | 4.141744000  | -1.755756000 |
| C  | 0.990619000  | 2.356620000  | -0.629010000 |
| H  | 2.040312000  | 2.646112000  | -0.491850000 |
| C  | 3.855462000  | 0.504504000  | -0.387683000 |
| C  | 3.875344000  | -0.569117000 | -1.303464000 |
| H  | 3.333263000  | -1.502379000 | -1.084900000 |
| C  | 4.575504000  | -0.439010000 | -2.511928000 |
| H  | 4.584946000  | -1.279510000 | -3.223428000 |
| C  | 5.263424000  | 0.750641000  | -2.809415000 |
| H  | 5.814074000  | 0.846963000  | -3.757788000 |
| C  | 5.246933000  | 1.817660000  | -1.895284000 |
| H  | 5.781392000  | 2.752022000  | -2.125127000 |

|   |              |              |              |
|---|--------------|--------------|--------------|
| C | 4.541378000  | 1.699080000  | -0.687131000 |
| H | 4.520359000  | 2.540771000  | 0.022191000  |
| C | 3.139150000  | 1.723966000  | 2.179539000  |
| C | 4.443047000  | 1.984546000  | 2.652904000  |
| H | 5.279423000  | 1.333871000  | 2.352393000  |
| C | 4.671232000  | 3.068298000  | 3.513989000  |
| H | 5.688780000  | 3.269984000  | 3.881400000  |
| C | 3.600425000  | 3.887382000  | 3.913926000  |
| H | 3.782259000  | 4.737383000  | 4.589531000  |
| C | 2.299332000  | 3.615387000  | 3.459708000  |
| H | 1.458397000  | 4.248862000  | 3.779946000  |
| C | 2.064081000  | 2.532745000  | 2.596786000  |
| H | 1.046560000  | 2.311340000  | 2.244125000  |
| C | -3.180591000 | -1.735041000 | -1.321056000 |
| C | -4.212366000 | -2.694228000 | -1.415896000 |
| H | -4.652080000 | -3.120519000 | -0.500679000 |
| C | -4.665769000 | -3.114772000 | -2.675020000 |
| H | -5.471844000 | -3.861230000 | -2.745363000 |
| C | -4.082005000 | -2.594522000 | -3.843228000 |
| H | -4.434390000 | -2.930023000 | -4.830258000 |
| C | -3.043393000 | -1.653535000 | -3.749862000 |
| H | -2.579202000 | -1.249917000 | -4.662284000 |
| C | -2.591156000 | -1.220929000 | -2.492527000 |
| H | -1.780365000 | -0.482295000 | -2.423010000 |
| C | -3.857503000 | -0.097243000 | 0.998098000  |
| C | -5.062000000 | 0.199620000  | 0.331713000  |
| H | -5.294744000 | -0.284652000 | -0.628363000 |
| C | -5.959266000 | 1.125045000  | 0.890240000  |
| H | -6.898792000 | 1.358141000  | 0.366450000  |
| C | -5.656584000 | 1.754809000  | 2.108165000  |
| H | -6.360984000 | 2.481422000  | 2.541459000  |
| C | -4.453495000 | 1.458550000  | 2.773467000  |
| H | -4.214651000 | 1.950226000  | 3.728390000  |
| C | -3.554595000 | 0.534727000  | 2.222715000  |
| H | -2.607183000 | 0.305567000  | 2.736278000  |
| B | 3.072306000  | -1.431475000 | 1.997445000  |
| H | 1.912286000  | -1.628202000 | 2.480580000  |
| H | 3.777610000  | -1.303884000 | 2.987473000  |
| H | 3.437653000  | -2.263856000 | 1.185715000  |
| B | -2.200681000 | -2.798789000 | 1.450742000  |
| H | -1.229772000 | -2.380084000 | 2.154914000  |
| H | -1.926014000 | -3.738783000 | 0.722421000  |
| H | -3.088544000 | -2.996399000 | 2.267517000  |
| O | 0.779263000  | -2.954188000 | 0.328677000  |
| C | 1.099829000  | -3.737620000 | -0.794622000 |
| H | 0.128431000  | -4.138763000 | -1.183970000 |
| C | 2.047386000  | -4.855033000 | -0.392297000 |
| H | 1.574813000  | -5.483062000 | 0.386237000  |
| H | 2.293750000  | -5.480647000 | -1.271831000 |
| H | 2.976724000  | -4.417167000 | 0.019556000  |
| O | 1.722263000  | -2.967443000 | -1.795983000 |
| C | 0.877771000  | -1.982300000 | -2.374814000 |
| H | -0.031489000 | -2.444232000 | -2.823999000 |
| H | 0.555279000  | -1.225897000 | -1.626967000 |
| H | 1.461117000  | -1.472474000 | -3.163901000 |

## H

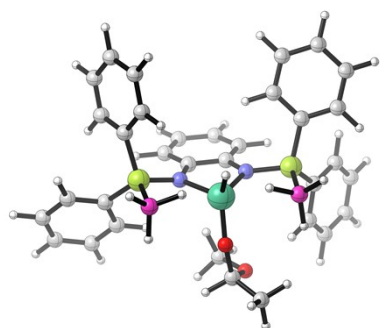

|    |              |              |              |
|----|--------------|--------------|--------------|
| Ti | 0.767327000  | -1.342872000 | 1.051306000  |
| H  | 0.619440000  | -1.589429000 | 2.740618000  |
| P  | 2.246358000  | 1.375042000  | 1.115338000  |
| P  | -2.117241000 | -2.149591000 | 0.216088000  |
| N  | 0.926240000  | 0.586930000  | 0.425675000  |
| N  | -0.932217000 | -0.987457000 | -0.060166000 |
| C  | -0.007940000 | 1.131429000  | -0.468893000 |
| C  | -1.089263000 | 0.236894000  | -0.723871000 |
| C  | -2.145990000 | 0.637510000  | -1.562590000 |
| H  | -2.983203000 | -0.045319000 | -1.758401000 |
| C  | -2.121231000 | 1.914684000  | -2.154471000 |
| H  | -2.950525000 | 2.222711000  | -2.809140000 |
| C  | -1.048235000 | 2.788547000  | -1.914252000 |
| H  | -1.031565000 | 3.785020000  | -2.380164000 |
| C  | 0.011446000  | 2.402487000  | -1.071199000 |
| H  | 0.842835000  | 3.092177000  | -0.876228000 |
| C  | 3.230712000  | 2.190258000  | -0.197042000 |
| C  | 3.784071000  | 1.342565000  | -1.181469000 |
| H  | 3.623181000  | 0.252016000  | -1.136037000 |
| C  | 4.526256000  | 1.896489000  | -2.235575000 |
| H  | 4.954068000  | 1.233560000  | -3.003418000 |
| C  | 4.727256000  | 3.286219000  | -2.310180000 |
| H  | 5.312762000  | 3.715545000  | -3.138082000 |
| C  | 4.179002000  | 4.127694000  | -1.328019000 |
| H  | 4.333542000  | 5.216446000  | -1.382952000 |
| C  | 3.426994000  | 3.583926000  | -0.273737000 |
| H  | 2.985070000  | 4.248039000  | 0.484200000  |
| C  | 1.618780000  | 2.702594000  | 2.202334000  |
| C  | 2.534517000  | 3.460146000  | 2.963471000  |
| H  | 3.615890000  | 3.267421000  | 2.878414000  |
| C  | 2.066052000  | 4.451697000  | 3.838737000  |
| H  | 2.781876000  | 5.042022000  | 4.430932000  |
| C  | 0.684748000  | 4.682316000  | 3.966370000  |
| H  | 0.318255000  | 5.460796000  | 4.653452000  |
| C  | -0.227657000 | 3.912325000  | 3.226625000  |
| H  | -1.310074000 | 4.082253000  | 3.333489000  |
| C  | 0.234047000  | 2.919490000  | 2.347827000  |
| H  | -0.479631000 | 2.309373000  | 1.775344000  |
| C  | -2.826231000 | -2.760439000 | -1.350419000 |
| C  | -4.017970000 | -3.515579000 | -1.346987000 |
| H  | -4.567579000 | -3.677027000 | -0.406742000 |
| C  | -4.502385000 | -4.063905000 | -2.544678000 |
| H  | -5.435374000 | -4.647590000 | -2.539946000 |
| C  | -3.797503000 | -3.869083000 | -3.745182000 |
| H  | -4.180338000 | -4.297726000 | -4.683610000 |
| C  | -2.601403000 | -3.131243000 | -3.746008000 |
| H  | -2.045444000 | -2.981424000 | -4.683927000 |
| C  | -2.111893000 | -2.580856000 | -2.552107000 |
| H  | -1.175322000 | -2.004554000 | -2.544941000 |
| C  | -3.467662000 | -1.313224000 | 1.124665000  |
| C  | -4.638872000 | -0.825140000 | 0.511608000  |
| H  | -4.824417000 | -1.016858000 | -0.555638000 |
| C  | -5.573367000 | -0.096543000 | 1.265308000  |
| H  | -6.486841000 | 0.283245000  | 0.782999000  |

|   |              |              |              |
|---|--------------|--------------|--------------|
| C | -5.340013000 | 0.152436000  | 2.627670000  |
| H | -6.074573000 | 0.724290000  | 3.215565000  |
| C | -4.169739000 | -0.329261000 | 3.241253000  |
| H | -3.984578000 | -0.135811000 | 4.308798000  |
| C | -3.235605000 | -1.061449000 | 2.494708000  |
| H | -2.316120000 | -1.436588000 | 2.971942000  |
| B | 3.129087000  | -0.068368000 | 2.016561000  |
| H | 2.139571000  | -0.779921000 | 2.377898000  |
| H | 3.626490000  | 0.307749000  | 3.067336000  |
| H | 3.882129000  | -0.607346000 | 1.225176000  |
| B | -1.116251000 | -3.465713000 | 1.183038000  |
| H | -0.347343000 | -2.748156000 | 1.895786000  |
| H | -0.535595000 | -4.143774000 | 0.350677000  |
| H | -1.805367000 | -4.069324000 | 1.992460000  |
| O | 1.846291000  | -2.466178000 | 0.193049000  |
| C | 2.672124000  | -2.815257000 | -0.892622000 |
| H | 2.140071000  | -3.633923000 | -1.442483000 |
| C | 4.029306000  | -3.275571000 | -0.387301000 |
| H | 3.900555000  | -4.131838000 | 0.301223000  |
| H | 4.669290000  | -3.578025000 | -1.238544000 |
| H | 4.514342000  | -2.445579000 | 0.161837000  |
| O | 2.870094000  | -1.722736000 | -1.761792000 |
| C | 1.717242000  | -1.352734000 | -2.506647000 |
| H | 1.442593000  | -2.144664000 | -3.242139000 |
| H | 0.844480000  | -1.159213000 | -1.848442000 |
| H | 1.960772000  | -0.419406000 | -3.047836000 |

### TS<sub>III</sub>

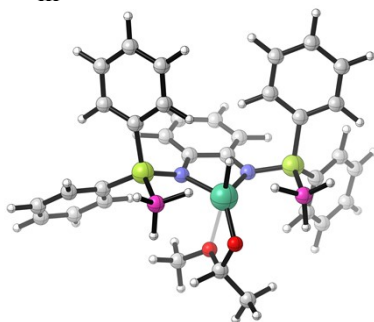

|    |              |              |              |
|----|--------------|--------------|--------------|
| Ti | 0.942447000  | -1.300618000 | 0.856679000  |
| H  | 0.312136000  | -0.952490000 | 2.403207000  |
| P  | 2.350184000  | 1.433317000  | 1.075437000  |
| P  | -1.947567000 | -2.017659000 | 0.073754000  |
| N  | 1.173870000  | 0.609817000  | 0.196595000  |
| N  | -0.749831000 | -0.899952000 | -0.278683000 |
| C  | 0.208368000  | 1.213479000  | -0.625865000 |
| C  | -0.917580000 | 0.366613000  | -0.848491000 |
| C  | -2.038448000 | 0.863313000  | -1.540182000 |
| H  | -2.935047000 | 0.238683000  | -1.659246000 |
| C  | -2.017136000 | 2.174334000  | -2.054751000 |
| H  | -2.896571000 | 2.556459000  | -2.594831000 |
| C  | -0.888254000 | 2.990027000  | -1.875292000 |
| H  | -0.873899000 | 4.011510000  | -2.283242000 |
| C  | 0.225343000  | 2.516923000  | -1.154527000 |
| H  | 1.093353000  | 3.167557000  | -0.985165000 |
| C  | 3.385278000  | 2.375575000  | -0.105376000 |
| C  | 3.898642000  | 1.625902000  | -1.187024000 |
| H  | 3.641596000  | 0.558200000  | -1.275680000 |
| C  | 4.702659000  | 2.250009000  | -2.150692000 |
| H  | 5.097159000  | 1.665261000  | -2.995778000 |
| C  | 5.002291000  | 3.619863000  | -2.040187000 |
| H  | 5.635416000  | 4.107815000  | -2.797318000 |
| C  | 4.487385000  | 4.366860000  | -0.968169000 |
| H  | 4.714993000  | 5.440543000  | -0.883340000 |

|   |              |              |              |
|---|--------------|--------------|--------------|
| C | 3.675143000  | 3.749420000  | -0.002156000 |
| H | 3.254314000  | 4.343519000  | 0.822408000  |
| C | 1.494878000  | 2.615796000  | 2.176707000  |
| C | 2.248687000  | 3.431274000  | 3.048527000  |
| H | 3.349593000  | 3.390506000  | 3.030994000  |
| C | 1.596119000  | 4.272855000  | 3.963391000  |
| H | 2.188445000  | 4.906358000  | 4.641414000  |
| C | 0.191861000  | 4.291314000  | 4.024952000  |
| H | -0.319140000 | 4.948942000  | 4.745117000  |
| C | -0.558149000 | 3.456404000  | 3.179490000  |
| H | -1.658082000 | 3.452972000  | 3.234241000  |
| C | 0.087313000  | 2.615306000  | 2.260140000  |
| H | -0.502074000 | 1.950729000  | 1.613970000  |
| C | -2.780707000 | -2.693816000 | -1.405172000 |
| C | -3.698116000 | -3.751431000 | -1.220382000 |
| H | -3.926635000 | -4.109597000 | -0.204258000 |
| C | -4.308290000 | -4.353569000 | -2.330738000 |
| H | -5.022976000 | -5.177318000 | -2.180941000 |
| C | -3.997721000 | -3.914154000 | -3.629734000 |
| H | -4.475098000 | -4.389544000 | -4.499928000 |
| C | -3.072646000 | -2.873318000 | -3.815933000 |
| H | -2.823666000 | -2.530764000 | -4.831799000 |
| C | -2.462404000 | -2.263702000 | -2.708005000 |
| H | -1.740745000 | -1.447218000 | -2.852298000 |
| C | -3.225534000 | -1.101470000 | 1.013824000  |
| C | -4.552934000 | -0.942902000 | 0.571457000  |
| H | -4.886640000 | -1.428825000 | -0.357636000 |
| C | -5.445982000 | -0.151113000 | 1.312535000  |
| H | -6.481755000 | -0.023565000 | 0.962686000  |
| C | -5.016441000 | 0.484481000  | 2.488783000  |
| H | -5.718481000 | 1.106396000  | 3.065308000  |
| C | -3.689299000 | 0.328736000  | 2.928433000  |
| H | -3.347423000 | 0.824615000  | 3.849487000  |
| C | -2.792073000 | -0.460033000 | 2.195217000  |
| H | -1.742975000 | -0.569456000 | 2.521720000  |
| B | 3.223214000  | 0.018392000  | 2.023939000  |
| H | 2.196517000  | -0.653522000 | 2.340443000  |
| H | 3.683883000  | 0.436143000  | 3.076075000  |
| H | 3.998429000  | -0.535171000 | 1.263864000  |
| B | -0.925025000 | -3.344596000 | 1.008342000  |
| H | -0.225737000 | -2.631723000 | 1.775644000  |
| H | -0.298700000 | -3.955432000 | 0.151014000  |
| H | -1.610560000 | -4.038065000 | 1.743900000  |
| O | 2.240418000  | -2.650262000 | 0.857693000  |
| C | 2.414997000  | -3.156993000 | -0.408216000 |
| H | 1.902716000  | -4.146401000 | -0.524752000 |
| C | 3.881185000  | -3.236401000 | -0.804905000 |
| H | 4.410761000  | -3.947897000 | -0.142082000 |
| H | 3.991557000  | -3.582449000 | -1.852576000 |
| H | 4.345942000  | -2.237284000 | -0.694543000 |
| O | 1.708533000  | -2.190319000 | -1.243624000 |
| C | 1.039836000  | -2.692611000 | -2.388780000 |
| H | 1.756122000  | -3.158714000 | -3.102084000 |
| H | 0.261024000  | -3.437530000 | -2.111848000 |
| H | 0.557732000  | -1.828334000 | -2.881155000 |

### S14.3 XYZ coordinates of the molecules present in Figure S86

TS<sub>JK</sub>



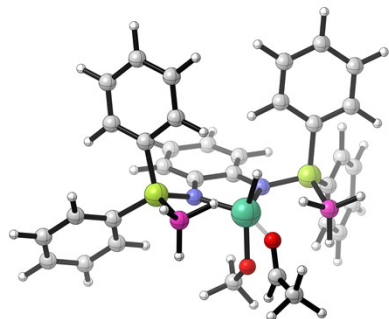

|    |              |              |              |
|----|--------------|--------------|--------------|
| Ti | 7.855550000  | 0.878201000  | 29.883008000 |
| H  | 7.713004000  | 0.846268000  | 31.620496000 |
| P  | 9.063647000  | 3.693113000  | 30.278716000 |
| P  | 4.919557000  | -0.018640000 | 29.549733000 |
| N  | 7.776845000  | 2.892539000  | 29.542399000 |
| N  | 5.971654000  | 1.236420000  | 29.153325000 |
| C  | 6.624518000  | 3.485162000  | 29.006085000 |
| C  | 5.583597000  | 2.533918000  | 28.794763000 |
| C  | 4.331645000  | 2.956922000  | 28.310427000 |
| H  | 3.521964000  | 2.229942000  | 28.161662000 |
| C  | 4.120208000  | 4.317376000  | 28.020828000 |
| H  | 3.140865000  | 4.644268000  | 27.640045000 |
| C  | 5.149242000  | 5.252392000  | 28.217978000 |
| H  | 4.980711000  | 6.315823000  | 27.989950000 |
| C  | 6.401108000  | 4.844013000  | 28.713947000 |
| H  | 7.195119000  | 5.581964000  | 28.881667000 |
| C  | 9.665910000  | 5.043281000  | 29.194834000 |
| C  | 10.204282000 | 4.650943000  | 27.950413000 |
| H  | 10.269575000 | 3.580428000  | 27.701433000 |
| C  | 10.644336000 | 5.621039000  | 27.038527000 |
| H  | 11.056729000 | 5.309645000  | 26.066913000 |
| C  | 10.560177000 | 6.985854000  | 27.365529000 |
| H  | 10.908033000 | 7.745932000  | 26.649497000 |
| C  | 10.029764000 | 7.378659000  | 28.605946000 |
| H  | 9.958879000  | 8.446832000  | 28.863348000 |
| C  | 9.578352000  | 6.412204000  | 29.519075000 |
| H  | 9.141540000  | 6.723339000  | 30.479355000 |
| C  | 8.418240000  | 4.469887000  | 31.802083000 |
| C  | 9.272998000  | 5.221683000  | 32.635806000 |
| H  | 10.322806000 | 5.387987000  | 32.347211000 |
| C  | 8.789527000  | 5.743101000  | 33.846006000 |
| H  | 9.459444000  | 6.325803000  | 34.496916000 |
| C  | 7.457973000  | 5.508691000  | 34.232230000 |
| H  | 7.082410000  | 5.915732000  | 35.183278000 |
| C  | 6.613014000  | 4.742951000  | 33.411279000 |
| H  | 5.573413000  | 4.544450000  | 33.712759000 |
| C  | 7.090016000  | 4.217473000  | 32.200957000 |
| H  | 6.437650000  | 3.598548000  | 31.569064000 |
| C  | 3.901641000  | -0.504266000 | 28.115820000 |
| C  | 2.837445000  | -1.416833000 | 28.278236000 |
| H  | 2.571418000  | -1.782830000 | 29.282003000 |
| C  | 2.123318000  | -1.865451000 | 27.156485000 |
| H  | 1.290473000  | -2.573496000 | 27.286988000 |
| C  | 2.474382000  | -1.416876000 | 25.871360000 |
| H  | 1.912845000  | -1.770416000 | 24.993432000 |
| C  | 3.546534000  | -0.523261000 | 25.707484000 |
| H  | 3.827288000  | -0.175981000 | 24.701648000 |
| C  | 4.263510000  | -0.068953000 | 26.824925000 |
| H  | 5.106907000  | 0.627972000  | 26.704986000 |
| C  | 3.806456000  | 0.686583000  | 30.822611000 |
| C  | 2.445754000  | 0.979191000  | 30.611711000 |
| H  | 1.965590000  | 0.714034000  | 29.658288000 |
| C  | 1.703559000  | 1.623529000  | 31.615904000 |
| H  | 0.641526000  | 1.856294000  | 31.444644000 |

|   |              |              |              |
|---|--------------|--------------|--------------|
| C | 2.318080000  | 1.981622000  | 32.826542000 |
| H | 1.734982000  | 2.488545000  | 33.610918000 |
| C | 3.679779000  | 1.696333000  | 33.035161000 |
| H | 4.165794000  | 1.977162000  | 33.982136000 |
| C | 4.426513000  | 1.051654000  | 32.039142000 |
| H | 5.501527000  | 0.851984000  | 32.190101000 |
| B | 10.276946000 | 2.244012000  | 30.557846000 |
| H | 9.448838000  | 1.411669000  | 31.012024000 |
| H | 11.050756000 | 2.461771000  | 31.478367000 |
| H | 10.775536000 | 1.950156000  | 29.481614000 |
| B | 6.166863000  | -1.343438000 | 30.136155000 |
| H | 6.926072000  | -0.614766000 | 30.834632000 |
| H | 6.671735000  | -1.817127000 | 29.130522000 |
| H | 5.682119000  | -2.138869000 | 30.928331000 |
| O | 9.240253000  | -0.862429000 | 30.785945000 |
| C | 9.934011000  | -1.606760000 | 30.099446000 |
| H | 9.932013000  | -1.462250000 | 28.987724000 |
| C | 10.777508000 | -2.692964000 | 30.688311000 |
| H | 10.469896000 | -3.668465000 | 30.253678000 |
| H | 11.836293000 | -2.540075000 | 30.386026000 |
| H | 10.690639000 | -2.718857000 | 31.790578000 |
| O | 8.701801000  | 0.147651000  | 28.392885000 |
| C | 8.420443000  | 0.600890000  | 27.093863000 |
| H | 9.362646000  | 0.687099000  | 26.503848000 |
| H | 7.753236000  | -0.120879000 | 26.565326000 |
| H | 7.919382000  | 1.597062000  | 27.082737000 |

## K

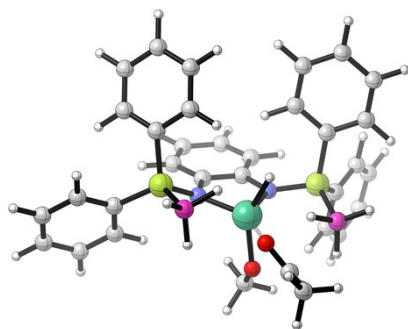

|    |              |              |              |
|----|--------------|--------------|--------------|
| Ti | 7.772514000  | 0.695255000  | 29.780753000 |
| H  | 7.858449000  | 0.893477000  | 31.511303000 |
| P  | 9.069195000  | 3.520925000  | 30.228994000 |
| P  | 4.808255000  | -0.030037000 | 29.537918000 |
| N  | 7.758918000  | 2.734508000  | 29.505579000 |
| N  | 5.913048000  | 1.129416000  | 29.014708000 |
| C  | 6.631207000  | 3.366233000  | 28.961219000 |
| C  | 5.579034000  | 2.446595000  | 28.677299000 |
| C  | 4.351147000  | 2.905200000  | 28.164071000 |
| H  | 3.540889000  | 2.191502000  | 27.960645000 |
| C  | 4.165907000  | 4.277332000  | 27.921390000 |
| H  | 3.206048000  | 4.634177000  | 27.518538000 |
| C  | 5.200258000  | 5.186842000  | 28.198793000 |
| H  | 5.054119000  | 6.262237000  | 28.015285000 |
| C  | 6.427671000  | 4.741630000  | 28.720345000 |
| H  | 7.215410000  | 5.467053000  | 28.954151000 |
| C  | 9.577347000  | 4.949543000  | 29.196602000 |
| C  | 9.901301000  | 4.677520000  | 27.850241000 |
| H  | 9.826402000  | 3.646840000  | 27.471571000 |
| C  | 10.295793000 | 5.718936000  | 26.999066000 |
| H  | 10.539658000 | 5.501956000  | 25.948016000 |
| C  | 10.380077000 | 7.035406000  | 27.486606000 |
| H  | 10.691551000 | 7.851884000  | 26.817423000 |
| C  | 10.063563000 | 7.307378000  | 28.827851000 |
| H  | 10.126255000 | 8.337064000  | 29.212142000 |

|   |              |              |              |
|---|--------------|--------------|--------------|
| C | 9.658293000  | 6.269502000  | 29.683040000 |
| H | 9.387478000  | 6.488070000  | 30.726559000 |
| C | 8.468127000  | 4.218261000  | 31.809619000 |
| C | 9.394111000  | 4.752409000  | 32.730201000 |
| H | 10.468525000 | 4.759264000  | 32.487561000 |
| C | 8.948234000  | 5.255381000  | 33.962996000 |
| H | 9.673888000  | 5.667904000  | 34.680480000 |
| C | 7.580352000  | 5.218106000  | 34.284478000 |
| H | 7.231530000  | 5.610068000  | 35.252076000 |
| C | 6.660569000  | 4.668216000  | 33.374880000 |
| H | 5.589009000  | 4.628318000  | 33.624547000 |
| C | 7.099373000  | 4.162731000  | 32.141656000 |
| H | 6.381135000  | 3.719574000  | 31.438351000 |
| C | 3.761347000  | -0.607869000 | 28.162171000 |
| C | 2.676521000  | -1.477593000 | 28.404752000 |
| H | 2.416710000  | -1.763930000 | 29.435816000 |
| C | 1.932465000  | -1.983044000 | 27.327794000 |
| H | 1.082429000  | -2.655767000 | 27.519437000 |
| C | 2.275074000  | -1.635095000 | 26.009291000 |
| H | 1.689647000  | -2.032934000 | 25.166685000 |
| C | 3.368691000  | -0.786234000 | 25.767008000 |
| H | 3.643003000  | -0.519732000 | 24.734993000 |
| C | 4.115117000  | -0.274234000 | 26.839389000 |
| H | 4.976997000  | 0.387077000  | 26.663069000 |
| C | 3.736819000  | 0.826834000  | 30.748917000 |
| C | 2.380851000  | 1.130880000  | 30.524114000 |
| H | 1.883661000  | 0.786213000  | 29.605445000 |
| C | 1.666142000  | 1.887352000  | 31.467911000 |
| H | 0.607816000  | 2.128091000  | 31.285502000 |
| C | 2.303407000  | 2.346379000  | 32.631660000 |
| H | 1.741480000  | 2.940250000  | 33.369120000 |
| C | 3.661279000  | 2.052342000  | 32.852190000 |
| H | 4.166371000  | 2.412223000  | 33.761344000 |
| C | 4.380861000  | 1.297902000  | 31.915565000 |
| H | 5.451831000  | 1.091535000  | 32.076434000 |
| B | 10.405062000 | 2.167294000  | 30.389475000 |
| H | 9.652015000  | 1.235619000  | 30.732355000 |
| H | 11.167448000 | 2.415158000  | 31.315645000 |
| H | 10.918363000 | 2.019034000  | 29.287523000 |
| B | 6.077294000  | -1.272842000 | 30.230889000 |
| H | 6.685369000  | -0.506986000 | 31.023692000 |
| H | 6.740905000  | -1.563395000 | 29.237096000 |
| H | 5.651487000  | -2.218979000 | 30.867465000 |
| O | 8.973870000  | -1.023900000 | 30.610508000 |
| C | 10.137549000 | -1.239359000 | 30.264169000 |
| H | 10.604811000 | -0.582556000 | 29.490236000 |
| C | 10.947716000 | -2.354544000 | 30.838284000 |
| H | 11.328738000 | -2.997481000 | 30.016324000 |
| H | 11.844575000 | -1.926605000 | 31.336447000 |
| H | 10.358568000 | -2.952199000 | 31.558265000 |
| O | 8.805617000  | 0.187748000  | 28.318797000 |
| C | 8.718609000  | 0.809109000  | 27.065609000 |
| H | 9.604683000  | 1.466400000  | 26.894750000 |
| H | 8.710818000  | 0.041314000  | 26.257505000 |
| H | 7.804332000  | 1.437712000  | 26.950280000 |

**TS<sub>KL</sub>**

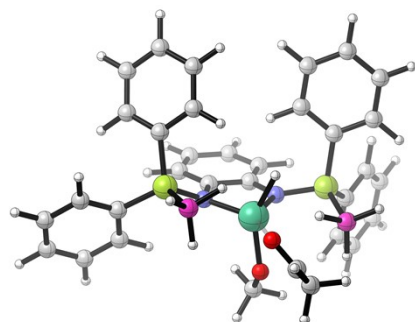

|    |              |              |              |
|----|--------------|--------------|--------------|
| Ti | 7.610164000  | 0.793741000  | 29.734699000 |
| H  | 7.717377000  | 0.977545000  | 31.466019000 |
| P  | 9.038290000  | 3.549760000  | 30.216068000 |
| P  | 4.615653000  | 0.203268000  | 29.529078000 |
| N  | 7.690584000  | 2.835395000  | 29.485549000 |
| N  | 5.761391000  | 1.325399000  | 29.013091000 |
| C  | 6.583802000  | 3.525995000  | 28.970675000 |
| C  | 5.482945000  | 2.661001000  | 28.699160000 |
| C  | 4.267892000  | 3.182782000  | 28.216784000 |
| H  | 3.421176000  | 2.509738000  | 28.023776000 |
| C  | 4.143548000  | 4.564674000  | 27.991157000 |
| H  | 3.193638000  | 4.970810000  | 27.612037000 |
| C  | 5.226376000  | 5.420481000  | 28.254541000 |
| H  | 5.128909000  | 6.503383000  | 28.083459000 |
| C  | 6.441563000  | 4.911842000  | 28.746052000 |
| H  | 7.268074000  | 5.596662000  | 28.967738000 |
| C  | 9.605733000  | 4.974862000  | 29.208294000 |
| C  | 9.942605000  | 4.708258000  | 27.864157000 |
| H  | 9.847429000  | 3.683501000  | 27.474078000 |
| C  | 10.377369000 | 5.747141000  | 27.029489000 |
| H  | 10.630885000 | 5.534259000  | 25.979914000 |
| C  | 10.490014000 | 7.055732000  | 27.532021000 |
| H  | 10.832866000 | 7.870340000  | 26.876022000 |
| C  | 10.161860000 | 7.322314000  | 28.871597000 |
| H  | 10.247278000 | 8.345830000  | 29.267763000 |
| C  | 9.715978000  | 6.287215000  | 29.709715000 |
| H  | 9.436144000  | 6.502335000  | 30.751521000 |
| C  | 8.473121000  | 4.245326000  | 31.810629000 |
| C  | 9.424525000  | 4.739974000  | 32.727309000 |
| H  | 10.496047000 | 4.716224000  | 32.473205000 |
| C  | 9.007034000  | 5.243911000  | 33.969511000 |
| H  | 9.752267000  | 5.626307000  | 34.683556000 |
| C  | 7.641727000  | 5.247391000  | 34.303809000 |
| H  | 7.314556000  | 5.641061000  | 35.278237000 |
| C  | 6.696155000  | 4.736398000  | 33.398039000 |
| H  | 5.626257000  | 4.729544000  | 33.657841000 |
| C  | 7.106608000  | 4.229339000  | 32.155651000 |
| H  | 6.368479000  | 3.814198000  | 31.455712000 |
| C  | 3.525004000  | -0.302080000 | 28.158913000 |
| C  | 2.413348000  | -1.137018000 | 28.402375000 |
| H  | 2.164201000  | -1.440818000 | 29.431144000 |
| C  | 1.628727000  | -1.585760000 | 27.329087000 |
| H  | 0.757793000  | -2.230844000 | 27.521607000 |
| C  | 1.957321000  | -1.216398000 | 26.012838000 |
| H  | 1.340021000  | -1.569856000 | 25.173128000 |
| C  | 3.077328000  | -0.403191000 | 25.768864000 |
| H  | 3.340344000  | -0.119911000 | 24.738411000 |
| C  | 3.864580000  | 0.052093000  | 26.837835000 |
| H  | 4.746582000  | 0.685662000  | 26.660117000 |
| C  | 3.596220000  | 1.076234000  | 30.773200000 |
| C  | 2.249452000  | 1.435358000  | 30.575685000 |
| H  | 1.725184000  | 1.126765000  | 29.659328000 |
| C  | 1.578391000  | 2.200096000  | 31.544587000 |
| H  | 0.527454000  | 2.484043000  | 31.383286000 |

|   |              |              |              |
|---|--------------|--------------|--------------|
| C | 2.249992000  | 2.612251000  | 32.706554000 |
| H | 1.722879000  | 3.213494000  | 33.463462000 |
| C | 3.598353000  | 2.261757000  | 32.900565000 |
| H | 4.130290000  | 2.583906000  | 33.808594000 |
| C | 4.274626000  | 1.498914000  | 31.938791000 |
| H | 5.338755000  | 1.248738000  | 32.079776000 |
| B | 10.322733000 | 2.143925000  | 30.345763000 |
| H | 9.546253000  | 1.233071000  | 30.686625000 |
| H | 11.108518000 | 2.357809000  | 31.261404000 |
| H | 10.817114000 | 1.992973000  | 29.235174000 |
| B | 5.844003000  | -1.103900000 | 30.178112000 |
| H | 6.488537000  | -0.380578000 | 30.980298000 |
| H | 6.486871000  | -1.392982000 | 29.169763000 |
| H | 5.390181000  | -2.050079000 | 30.794545000 |
| O | 8.746660000  | -0.982876000 | 30.530690000 |
| C | 9.897420000  | -1.242375000 | 30.171439000 |
| H | 10.386828000 | -0.594153000 | 29.404191000 |
| C | 10.663031000 | -2.400076000 | 30.722240000 |
| H | 11.011377000 | -3.044943000 | 29.887403000 |
| H | 11.580230000 | -2.017854000 | 31.220496000 |
| H | 10.054131000 | -2.983931000 | 31.437057000 |
| O | 8.615718000  | 0.274604000  | 28.257956000 |
| C | 8.532811000  | 0.911400000  | 27.012120000 |
| H | 9.419733000  | 1.569145000  | 26.850047000 |
| H | 8.524098000  | 0.152767000  | 26.195540000 |
| H | 7.620548000  | 1.543782000  | 26.902819000 |

## L

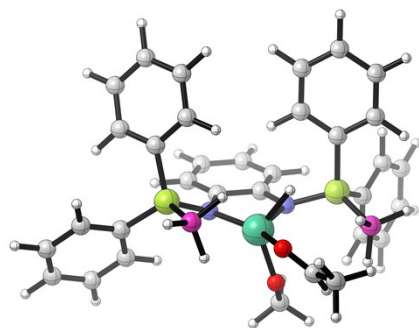

|    |              |             |              |
|----|--------------|-------------|--------------|
| Ti | 7.492213000  | 0.703461000 | 29.571988000 |
| H  | 8.035424000  | 1.233470000 | 31.111936000 |
| P  | 9.073929000  | 3.353496000 | 30.125592000 |
| P  | 4.507283000  | 0.254182000 | 29.554715000 |
| N  | 7.705751000  | 2.730336000 | 29.316766000 |
| N  | 5.646090000  | 1.342411000 | 28.979685000 |
| C  | 6.616343000  | 3.479707000 | 28.847191000 |
| C  | 5.439193000  | 2.688195000 | 28.661454000 |
| C  | 4.232252000  | 3.272659000 | 28.235783000 |
| H  | 3.337207000  | 2.646165000 | 28.111297000 |
| C  | 4.178841000  | 4.653138000 | 27.980695000 |
| H  | 3.235764000  | 5.111550000 | 27.647231000 |
| C  | 5.330911000  | 5.439259000 | 28.156097000 |
| H  | 5.295140000  | 6.521243000 | 27.957614000 |
| C  | 6.539880000  | 4.867759000 | 28.587646000 |
| H  | 7.417811000  | 5.505442000 | 28.731736000 |
| C  | 9.624305000  | 4.849036000 | 29.200487000 |
| C  | 10.008704000 | 4.674352000 | 27.854502000 |
| H  | 9.947026000  | 3.675637000 | 27.396608000 |
| C  | 10.456519000 | 5.768689000 | 27.101129000 |
| H  | 10.746414000 | 5.624866000 | 26.049189000 |
| C  | 10.537999000 | 7.043879000 | 27.687768000 |
| H  | 10.890208000 | 7.902470000 | 27.095973000 |
| C  | 10.169781000 | 7.218348000 | 29.031754000 |

|   |              |              |              |
|---|--------------|--------------|--------------|
| H | 10.233568000 | 8.214317000  | 29.496963000 |
| C | 9.712931000  | 6.126321000  | 29.787905000 |
| H | 9.406988000  | 6.271249000  | 30.834356000 |
| C | 8.466776000  | 3.983459000  | 31.737729000 |
| C | 9.400867000  | 4.351371000  | 32.728695000 |
| H | 10.477991000 | 4.253477000  | 32.523742000 |
| C | 8.955563000  | 4.824092000  | 33.974170000 |
| H | 9.688690000  | 5.107299000  | 34.744973000 |
| C | 7.579346000  | 4.927406000  | 34.238034000 |
| H | 7.231018000  | 5.300215000  | 35.213550000 |
| C | 6.648411000  | 4.546996000  | 33.255836000 |
| H | 5.568226000  | 4.623998000  | 33.455361000 |
| C | 7.086696000  | 4.070454000  | 32.011066000 |
| H | 6.355669000  | 3.763223000  | 31.250517000 |
| C | 3.404954000  | -0.312752000 | 28.219215000 |
| C | 2.355560000  | -1.215670000 | 28.494151000 |
| H | 2.167087000  | -1.547228000 | 29.527359000 |
| C | 1.555671000  | -1.694744000 | 27.445762000 |
| H | 0.734752000  | -2.395873000 | 27.661144000 |
| C | 1.806624000  | -1.284928000 | 26.124050000 |
| H | 1.177968000  | -1.662936000 | 25.303672000 |
| C | 2.863485000  | -0.400458000 | 25.849023000 |
| H | 3.064732000  | -0.084787000 | 24.814113000 |
| C | 3.667251000  | 0.084172000  | 26.892903000 |
| H | 4.502181000  | 0.772343000  | 26.691235000 |
| C | 3.483945000  | 1.126779000  | 30.791705000 |
| C | 2.129750000  | 1.453514000  | 30.584681000 |
| H | 1.618251000  | 1.125426000  | 29.667813000 |
| C | 1.436380000  | 2.206854000  | 31.546051000 |
| H | 0.379652000  | 2.464557000  | 31.378811000 |
| C | 2.092161000  | 2.638808000  | 32.710195000 |
| H | 1.546511000  | 3.228823000  | 33.462651000 |
| C | 3.447187000  | 2.321789000  | 32.913129000 |
| H | 3.966181000  | 2.659525000  | 33.822642000 |
| C | 4.146133000  | 1.571264000  | 31.957721000 |
| H | 5.211435000  | 1.340512000  | 32.111010000 |
| B | 10.645135000 | 2.239311000  | 30.260162000 |
| H | 10.438725000 | 1.303374000  | 31.027396000 |
| H | 11.457931000 | 3.047667000  | 30.717579000 |
| H | 10.925102000 | 1.922580000  | 29.104808000 |
| B | 5.759209000  | -1.033041000 | 30.232101000 |
| H | 6.368709000  | -0.379540000 | 31.097853000 |
| H | 6.489054000  | -1.202428000 | 29.234662000 |
| H | 5.326258000  | -2.084293000 | 30.659878000 |
| O | 8.739368000  | -0.820002000 | 30.504093000 |
| C | 9.931669000  | -0.984195000 | 30.216420000 |
| H | 10.356020000 | -0.446129000 | 29.337408000 |
| C | 10.821400000 | -1.891688000 | 30.997912000 |
| H | 11.279757000 | -2.643757000 | 30.320733000 |
| H | 11.660106000 | -1.289953000 | 31.408904000 |
| H | 10.272469000 | -2.389347000 | 31.818053000 |
| O | 8.568023000  | 0.361792000  | 28.138931000 |
| C | 8.730874000  | 1.001206000  | 26.902569000 |
| H | 9.809958000  | 1.027584000  | 26.627346000 |
| H | 8.183049000  | 0.458565000  | 26.098952000 |
| H | 8.352138000  | 2.047708000  | 26.936927000 |

**TS<sub>LM</sub>**

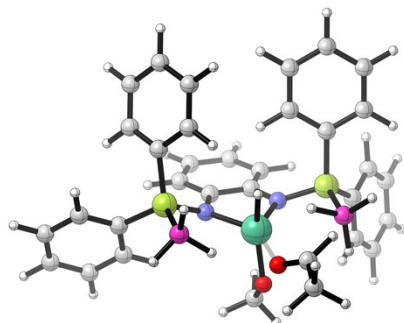

|    |              |              |              |
|----|--------------|--------------|--------------|
| Ti | 7.990471000  | 0.874447000  | 29.641093000 |
| H  | 7.783282000  | 0.490860000  | 31.327713000 |
| P  | 9.008167000  | 3.754138000  | 30.260221000 |
| P  | 5.044852000  | -0.055322000 | 29.527152000 |
| N  | 7.818540000  | 2.906236000  | 29.426630000 |
| N  | 6.071129000  | 1.179973000  | 28.999569000 |
| C  | 6.650941000  | 3.458441000  | 28.880342000 |
| C  | 5.642630000  | 2.475047000  | 28.661812000 |
| C  | 4.377083000  | 2.867148000  | 28.185980000 |
| H  | 3.591571000  | 2.118160000  | 28.024731000 |
| C  | 4.122810000  | 4.223179000  | 27.911186000 |
| H  | 3.132844000  | 4.522548000  | 27.535327000 |
| C  | 5.122734000  | 5.188087000  | 28.112443000 |
| H  | 4.921520000  | 6.247413000  | 27.891861000 |
| C  | 6.387027000  | 4.812684000  | 28.601359000 |
| H  | 7.161147000  | 5.571203000  | 28.773246000 |
| C  | 9.654925000  | 5.111018000  | 29.212292000 |
| C  | 10.288709000 | 4.715345000  | 28.014252000 |
| H  | 10.395107000 | 3.643509000  | 27.785038000 |
| C  | 10.769170000 | 5.683879000  | 27.121623000 |
| H  | 11.255345000 | 5.369861000  | 26.185594000 |
| C  | 10.629579000 | 7.050454000  | 27.422056000 |
| H  | 11.008706000 | 7.809580000  | 26.721141000 |
| C  | 10.002802000 | 7.446174000  | 28.615734000 |
| H  | 9.887244000  | 8.515569000  | 28.850898000 |
| C  | 9.510805000  | 6.480968000  | 29.509318000 |
| H  | 9.000008000  | 6.795179000  | 30.431485000 |
| C  | 8.222642000  | 4.508787000  | 31.727055000 |
| C  | 8.980884000  | 5.310231000  | 32.607255000 |
| H  | 10.036800000 | 5.530740000  | 32.384982000 |
| C  | 8.393503000  | 5.811987000  | 33.779113000 |
| H  | 8.987825000  | 6.434463000  | 34.465760000 |
| C  | 7.053809000  | 5.509648000  | 34.080796000 |
| H  | 6.595970000  | 5.904824000  | 35.000390000 |
| C  | 6.305987000  | 4.692904000  | 33.216191000 |
| H  | 5.261214000  | 4.439892000  | 33.449539000 |
| C  | 6.887221000  | 4.185517000  | 32.044098000 |
| H  | 6.306377000  | 3.528666000  | 31.380890000 |
| C  | 3.886409000  | -0.513327000 | 28.189544000 |
| C  | 2.742182000  | -1.291083000 | 28.465440000 |
| H  | 2.497321000  | -1.566760000 | 29.503091000 |
| C  | 1.917810000  | -1.720901000 | 27.413959000 |
| H  | 1.021346000  | -2.320551000 | 27.633966000 |
| C  | 2.237830000  | -1.389968000 | 26.085772000 |
| H  | 1.589184000  | -1.727973000 | 25.263438000 |
| C  | 3.389542000  | -0.633389000 | 25.808673000 |
| H  | 3.646332000  | -0.378280000 | 24.769185000 |
| C  | 4.215650000  | -0.198011000 | 26.856014000 |
| H  | 5.119045000  | 0.396004000  | 26.651119000 |
| C  | 4.061379000  | 0.698359000  | 30.876084000 |
| C  | 2.742715000  | 1.170246000  | 30.725736000 |
| H  | 2.197224000  | 1.000010000  | 29.786243000 |
| C  | 2.123317000  | 1.865362000  | 31.778094000 |
| H  | 1.094153000  | 2.235006000  | 31.655863000 |

|   |              |              |              |
|---|--------------|--------------|--------------|
| C | 2.818414000  | 2.096744000  | 32.976158000 |
| H | 2.330804000  | 2.642780000  | 33.798706000 |
| C | 4.138310000  | 1.632800000  | 33.124089000 |
| H | 4.689004000  | 1.814897000  | 34.059664000 |
| C | 4.761892000  | 0.936453000  | 32.079311000 |
| H | 5.809227000  | 0.599777000  | 32.170558000 |
| B | 10.227169000 | 2.343659000  | 30.668687000 |
| H | 9.350838000  | 1.500095000  | 31.004500000 |
| H | 10.873003000 | 2.573172000  | 31.682229000 |
| H | 10.861796000 | 2.056735000  | 29.667232000 |
| B | 6.247338000  | -1.485871000 | 29.993248000 |
| H | 7.336395000  | -1.060418000 | 29.557244000 |
| H | 5.977397000  | -2.436183000 | 29.268353000 |
| H | 6.232200000  | -1.707913000 | 31.191454000 |
| O | 9.503444000  | -0.846105000 | 30.257928000 |
| C | 10.404261000 | -0.927334000 | 31.082179000 |
| H | 10.685815000 | -0.028629000 | 31.694126000 |
| C | 11.171945000 | -2.188845000 | 31.328747000 |
| H | 12.255806000 | -1.999858000 | 31.170044000 |
| H | 11.060925000 | -2.480325000 | 32.395961000 |
| H | 10.820414000 | -3.004422000 | 30.670632000 |
| O | 8.920089000  | 0.382425000  | 28.124903000 |
| C | 8.627358000  | 0.942205000  | 26.870440000 |
| H | 9.567857000  | 1.069830000  | 26.285339000 |
| H | 7.958210000  | 0.267250000  | 26.286598000 |
| H | 8.129416000  | 1.938442000  | 26.940496000 |

## M

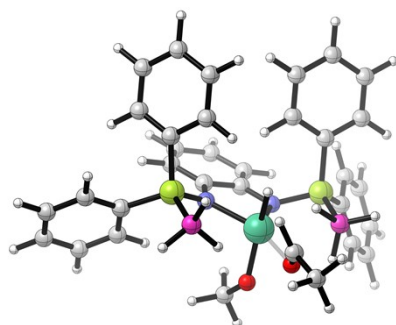

|    |              |              |              |
|----|--------------|--------------|--------------|
| Ti | 8.129592000  | 0.997798000  | 29.531173000 |
| H  | 7.824894000  | 0.616592000  | 31.220696000 |
| P  | 9.094262000  | 3.865167000  | 30.067083000 |
| P  | 5.170070000  | -0.020331000 | 29.620634000 |
| N  | 7.931769000  | 3.012911000  | 29.190834000 |
| N  | 6.141622000  | 1.269864000  | 29.119431000 |
| C  | 6.699914000  | 3.525869000  | 28.760944000 |
| C  | 5.669694000  | 2.539085000  | 28.755438000 |
| C  | 4.353363000  | 2.912106000  | 28.417279000 |
| H  | 3.547363000  | 2.168302000  | 28.423893000 |
| C  | 4.071302000  | 4.243648000  | 28.064979000 |
| H  | 3.041517000  | 4.524032000  | 27.796623000 |
| C  | 5.092732000  | 5.207308000  | 28.046584000 |
| H  | 4.869854000  | 6.245024000  | 27.755825000 |
| C  | 6.407388000  | 4.852759000  | 28.397009000 |
| H  | 7.207231000  | 5.604213000  | 28.379473000 |
| C  | 9.803626000  | 5.267059000  | 29.124574000 |
| C  | 10.829141000 | 4.963011000  | 28.203754000 |
| H  | 11.181939000 | 3.924607000  | 28.108481000 |
| C  | 11.395714000 | 5.980450000  | 27.421067000 |
| H  | 12.196585000 | 5.737392000  | 26.705934000 |
| C  | 10.948291000 | 7.305703000  | 27.556837000 |
| H  | 11.397298000 | 8.103964000  | 26.946500000 |
| C  | 9.929550000  | 7.613189000  | 28.475512000 |



|   |              |              |              |
|---|--------------|--------------|--------------|
| H | 9.577285000  | 8.650506000  | 28.582992000 |
| C | 9.355902000  | 6.598830000  | 29.256833000 |
| H | 8.554787000  | 6.840708000  | 29.971708000 |
| C | 8.253918000  | 4.573521000  | 31.527540000 |
| C | 8.884928000  | 5.545053000  | 32.332934000 |
| H | 9.872412000  | 5.940408000  | 32.050844000 |
| C | 8.255203000  | 6.003860000  | 33.500436000 |
| H | 8.751088000  | 6.761426000  | 34.126659000 |
| C | 6.997729000  | 5.495367000  | 33.869855000 |
| H | 6.504055000  | 5.862182000  | 34.782601000 |
| C | 6.377080000  | 4.514437000  | 33.078503000 |
| H | 5.396324000  | 4.104118000  | 33.359331000 |
| C | 7.003802000  | 4.045678000  | 31.914674000 |
| H | 6.524977000  | 3.261516000  | 31.311477000 |
| C | 4.006855000  | -0.458962000 | 28.279512000 |
| C | 2.926157000  | -1.329248000 | 28.536249000 |
| H | 2.738111000  | -1.690106000 | 29.559450000 |
| C | 2.096010000  | -1.745477000 | 27.483949000 |
| H | 1.250594000  | -2.419887000 | 27.690022000 |
| C | 2.348032000  | -1.308909000 | 26.171593000 |
| H | 1.696505000  | -1.637848000 | 25.347756000 |
| C | 3.436797000  | -0.459317000 | 25.911930000 |
| H | 3.641234000  | -0.120938000 | 24.884776000 |
| C | 4.267889000  | -0.036398000 | 26.960805000 |
| H | 5.121221000  | 0.629732000  | 26.765686000 |
| C | 4.176080000  | 0.633930000  | 31.014904000 |
| C | 2.820882000  | 1.007160000  | 30.921810000 |
| H | 2.261492000  | 0.833108000  | 29.990735000 |
| C | 2.181342000  | 1.604740000  | 32.020793000 |
| H | 1.123622000  | 1.898416000  | 31.942530000 |
| C | 2.890843000  | 1.833975000  | 33.211000000 |
| H | 2.386812000  | 2.301836000  | 34.070844000 |
| C | 4.245672000  | 1.466455000  | 33.303462000 |
| H | 4.805177000  | 1.643597000  | 34.234924000 |
| C | 4.890238000  | 0.869173000  | 32.210684000 |
| H | 5.959787000  | 0.601695000  | 32.257703000 |
| B | 10.255503000 | 2.401443000  | 30.450948000 |
| H | 9.373040000  | 1.665590000  | 30.976156000 |
| H | 11.094416000 | 2.596180000  | 31.313941000 |
| H | 10.666997000 | 1.989238000  | 29.375086000 |
| B | 6.387865000  | -1.459676000 | 30.016019000 |
| H | 7.439760000  | -1.025479000 | 29.516529000 |
| H | 6.047767000  | -2.427104000 | 29.344414000 |
| H | 6.447804000  | -1.651720000 | 31.221879000 |
| O | 9.737931000  | -0.548255000 | 30.156103000 |
| C | 9.661927000  | -1.285536000 | 31.135402000 |
| H | 8.761110000  | -1.217893000 | 31.799664000 |
| C | 10.721829000 | -2.279369000 | 31.484350000 |
| H | 11.087189000 | -2.077776000 | 32.514247000 |
| H | 10.270468000 | -3.294823000 | 31.511458000 |
| H | 11.559931000 | -2.247457000 | 30.764104000 |
| O | 8.734010000  | 0.296091000  | 27.939270000 |
| C | 8.265813000  | 0.710098000  | 26.684015000 |
| H | 9.110462000  | 0.740982000  | 25.957614000 |
| H | 7.510086000  | -0.010393000 | 26.290040000 |
| H | 7.797009000  | 1.723049000  | 26.703939000 |

**TS<sub>MN</sub>**

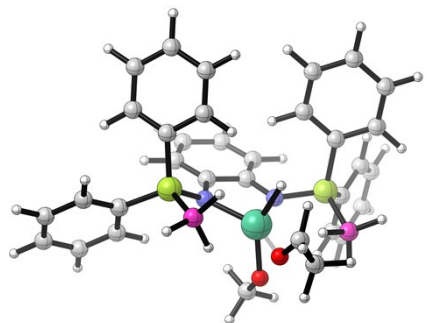

|    |              |              |              |
|----|--------------|--------------|--------------|
| Ti | 7.989664000  | 0.845639000  | 29.547001000 |
| H  | 8.022261000  | 1.071173000  | 31.292341000 |
| P  | 9.153593000  | 3.692242000  | 30.045695000 |
| P  | 5.033729000  | -0.026645000 | 29.525907000 |
| N  | 7.884350000  | 2.872546000  | 29.284568000 |
| N  | 6.061554000  | 1.192656000  | 28.976200000 |
| C  | 6.687245000  | 3.456599000  | 28.843399000 |
| C  | 5.645451000  | 2.499042000  | 28.672133000 |
| C  | 4.360630000  | 2.909574000  | 28.273013000 |
| H  | 3.557711000  | 2.169667000  | 28.151563000 |
| C  | 4.107119000  | 4.271841000  | 28.032942000 |
| H  | 3.102288000  | 4.590670000  | 27.717753000 |
| C  | 5.132335000  | 5.217342000  | 28.195655000 |
| H  | 4.934704000  | 6.283804000  | 28.008157000 |
| C  | 6.418376000  | 4.819677000  | 28.602429000 |
| H  | 7.204409000  | 5.570392000  | 28.742527000 |
| C  | 9.579823000  | 5.192739000  | 29.077916000 |
| C  | 9.969169000  | 4.993502000  | 27.736070000 |
| H  | 10.002729000 | 3.972614000  | 27.326106000 |
| C  | 10.296117000 | 6.092037000  | 26.929149000 |
| H  | 10.592287000 | 5.930682000  | 25.881609000 |
| C  | 10.249572000 | 7.394523000  | 27.457265000 |
| H  | 10.509786000 | 8.255801000  | 26.823358000 |
| C  | 9.870209000  | 7.594683000  | 28.794722000 |
| H  | 9.830559000  | 8.612956000  | 29.211502000 |
| C  | 9.531434000  | 6.498684000  | 29.604899000 |
| H  | 9.212462000  | 6.660467000  | 30.644978000 |
| C  | 8.522124000  | 4.300603000  | 31.652377000 |
| C  | 9.429794000  | 4.855533000  | 32.579229000 |
| H  | 10.498800000 | 4.928528000  | 32.324260000 |
| C  | 8.974224000  | 5.298600000  | 33.831377000 |
| H  | 9.686909000  | 5.727611000  | 34.552346000 |
| C  | 7.613825000  | 5.182818000  | 34.165989000 |
| H  | 7.256814000  | 5.530722000  | 35.147368000 |
| C  | 6.712989000  | 4.613180000  | 33.249710000 |
| H  | 5.647626000  | 4.512474000  | 33.507415000 |
| C  | 7.162391000  | 4.165407000  | 31.997932000 |
| H  | 6.456908000  | 3.707903000  | 31.291371000 |
| C  | 3.955602000  | -0.597088000 | 28.169095000 |
| C  | 2.936832000  | -1.540602000 | 28.422328000 |
| H  | 2.751692000  | -1.892634000 | 29.449249000 |
| C  | 2.167138000  | -2.039778000 | 27.360711000 |
| H  | 1.370229000  | -2.772465000 | 27.561111000 |
| C  | 2.420044000  | -1.612558000 | 26.045144000 |
| H  | 1.816711000  | -2.007460000 | 25.213805000 |
| C  | 3.449533000  | -0.690632000 | 25.790548000 |
| H  | 3.655678000  | -0.363248000 | 24.760242000 |
| C  | 4.220708000  | -0.184327000 | 26.848298000 |
| H  | 5.034622000  | 0.532196000  | 26.659930000 |
| C  | 3.984699000  | 0.746531000  | 30.808937000 |
| C  | 2.599796000  | 0.961809000  | 30.678433000 |
| H  | 2.068098000  | 0.607376000  | 29.782942000 |
| C  | 1.899324000  | 1.642051000  | 31.688656000 |
| H  | 0.817174000  | 1.813460000  | 31.581884000 |

|   |              |              |              |
|---|--------------|--------------|--------------|
| C | 2.579447000  | 2.112524000  | 32.823493000 |
| H | 2.028305000  | 2.645862000  | 33.613553000 |
| C | 3.965767000  | 1.907577000  | 32.948024000 |
| H | 4.503855000  | 2.277778000  | 33.833869000 |
| C | 4.671910000  | 1.229154000  | 31.945388000 |
| H | 5.763844000  | 1.089579000  | 32.026564000 |
| B | 10.585172000 | 2.428411000  | 30.143287000 |
| H | 9.948378000  | 1.384581000  | 30.347825000 |
| H | 11.286963000 | 2.679648000  | 31.116939000 |
| H | 11.141039000 | 2.422092000  | 29.053790000 |
| B | 6.314067000  | -1.316552000 | 30.128336000 |
| H | 7.198276000  | -1.128324000 | 29.266545000 |
| H | 5.929070000  | -2.469723000 | 30.011203000 |
| H | 6.648255000  | -0.994184000 | 31.260440000 |
| O | 9.297792000  | -0.850779000 | 30.346899000 |
| C | 9.598184000  | -1.045802000 | 31.521707000 |
| H | 9.208710000  | -0.337862000 | 32.300504000 |
| C | 10.466522000 | -2.178201000 | 31.958109000 |
| H | 11.362524000 | -1.766323000 | 32.470758000 |
| H | 9.924396000  | -2.783527000 | 32.716309000 |
| H | 10.769880000 | -2.807466000 | 31.101723000 |
| O | 9.008875000  | 0.411498000  | 28.079507000 |
| C | 8.826806000  | 0.981178000  | 26.812910000 |
| H | 9.645625000  | 1.707930000  | 26.598145000 |
| H | 8.866951000  | 0.188888000  | 26.030631000 |
| H | 7.856014000  | 1.522374000  | 26.707237000 |

N

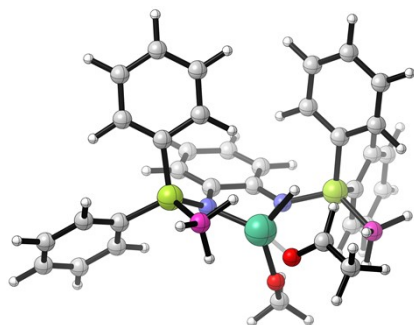

|    |              |              |              |
|----|--------------|--------------|--------------|
| Ti | 7.720908000  | 0.772134000  | 29.683097000 |
| H  | 7.999223000  | 1.193504000  | 31.334332000 |
| P  | 8.930789000  | 3.491081000  | 30.662680000 |
| P  | 4.824990000  | -0.004816000 | 29.432211000 |
| N  | 7.706791000  | 2.836593000  | 29.664966000 |
| N  | 5.856017000  | 1.259170000  | 29.040293000 |
| C  | 6.558416000  | 3.498475000  | 29.210435000 |
| C  | 5.497547000  | 2.601653000  | 28.869666000 |
| C  | 4.241304000  | 3.084147000  | 28.459801000 |
| H  | 3.430951000  | 2.374503000  | 28.237817000 |
| C  | 4.025809000  | 4.467907000  | 28.351432000 |
| H  | 3.043949000  | 4.846597000  | 28.030413000 |
| C  | 5.069760000  | 5.358505000  | 28.655448000 |
| H  | 4.910924000  | 6.444481000  | 28.567329000 |
| C  | 6.323594000  | 4.888644000  | 29.081546000 |
| H  | 7.111180000  | 5.607577000  | 29.329877000 |
| C  | 9.298619000  | 5.191072000  | 30.060897000 |
| C  | 9.794518000  | 5.332196000  | 28.747460000 |
| H  | 9.924806000  | 4.439293000  | 28.118446000 |
| C  | 10.109517000 | 6.602803000  | 28.246327000 |
| H  | 10.488085000 | 6.706161000  | 27.218149000 |
| C  | 9.946027000  | 7.741078000  | 29.055969000 |
| H  | 10.194831000 | 8.738229000  | 28.661803000 |
| C  | 9.469553000  | 7.602069000  | 30.369970000 |

|   |              |              |              |
|---|--------------|--------------|--------------|
| H | 9.344059000  | 8.489970000  | 31.008657000 |
| C | 9.145988000  | 6.331346000  | 30.874246000 |
| H | 8.759050000  | 6.226559000  | 31.898254000 |
| C | 8.179543000  | 3.743725000  | 32.319892000 |
| C | 8.997330000  | 3.631530000  | 33.462841000 |
| H | 10.064589000 | 3.394474000  | 33.339009000 |
| C | 8.446799000  | 3.810022000  | 34.743017000 |
| H | 9.089190000  | 3.715021000  | 35.632059000 |
| C | 7.081646000  | 4.106821000  | 34.889089000 |
| H | 6.652550000  | 4.254034000  | 35.892311000 |
| C | 6.264772000  | 4.218508000  | 33.749693000 |
| H | 5.196530000  | 4.463408000  | 33.856090000 |
| C | 6.806082000  | 4.032663000  | 32.468408000 |
| H | 6.160005000  | 4.114438000  | 31.583053000 |
| C | 3.861591000  | -0.559849000 | 27.988977000 |
| C | 3.011356000  | -1.681287000 | 28.100348000 |
| H | 2.895221000  | -2.194930000 | 29.067961000 |
| C | 2.327747000  | -2.153860000 | 26.969774000 |
| H | 1.665754000  | -3.028830000 | 27.057198000 |
| C | 2.501171000  | -1.520409000 | 25.726353000 |
| H | 1.967968000  | -1.895654000 | 24.839789000 |
| C | 3.365480000  | -0.418533000 | 25.611499000 |
| H | 3.511494000  | 0.069616000  | 24.636081000 |
| C | 4.050705000  | 0.061936000  | 26.738536000 |
| H | 4.739937000  | 0.915613000  | 26.655871000 |
| C | 3.668713000  | 0.630130000  | 30.696174000 |
| C | 2.267515000  | 0.543794000  | 30.596252000 |
| H | 1.803960000  | 0.063295000  | 29.721352000 |
| C | 1.461243000  | 1.087681000  | 31.610409000 |
| H | 0.365111000  | 1.020607000  | 31.530347000 |
| C | 2.050622000  | 1.720830000  | 32.716947000 |
| H | 1.416213000  | 2.147337000  | 33.509054000 |
| C | 3.450831000  | 1.818560000  | 32.808942000 |
| H | 3.919890000  | 2.320915000  | 33.668123000 |
| C | 4.262312000  | 1.279755000  | 31.802136000 |
| H | 5.359126000  | 1.379529000  | 31.863112000 |
| B | 10.645739000 | 2.602963000  | 30.695851000 |
| H | 10.572228000 | 1.500431000  | 31.230475000 |
| H | 11.304904000 | 3.406806000  | 31.361488000 |
| H | 11.009861000 | 2.573509000  | 29.524850000 |
| B | 6.173297000  | -1.228426000 | 30.035501000 |
| H | 6.962991000  | -1.199524000 | 29.071823000 |
| H | 5.831868000  | -2.363190000 | 30.305465000 |
| H | 6.655668000  | -0.627356000 | 31.013167000 |
| O | 9.117964000  | -0.779271000 | 30.462546000 |
| C | 9.727335000  | -0.727656000 | 31.533006000 |
| H | 9.405264000  | 0.013072000  | 32.306527000 |
| C | 10.875847000 | -1.625419000 | 31.849437000 |
| H | 11.771333000 | -0.989685000 | 32.019905000 |
| H | 10.684388000 | -2.159115000 | 32.804723000 |
| H | 11.068132000 | -2.341877000 | 31.030102000 |
| O | 8.940652000  | 0.756070000  | 28.356796000 |
| C | 9.281469000  | 1.557785000  | 27.264320000 |
| H | 10.388054000 | 1.641109000  | 27.180079000 |
| H | 8.889339000  | 1.121065000  | 26.317491000 |
| H | 8.856700000  | 2.581588000  | 27.380250000 |

**TS<sub>No</sub>**

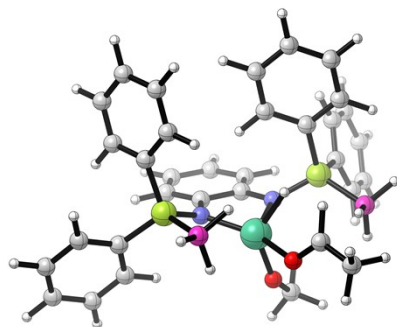

|    |              |              |              |
|----|--------------|--------------|--------------|
| Ti | 7.786478000  | 0.748697000  | 29.563077000 |
| H  | 8.214002000  | 1.193720000  | 31.166154000 |
| P  | 8.951814000  | 3.459015000  | 30.645629000 |
| P  | 4.846445000  | 0.034632000  | 29.630630000 |
| N  | 7.825521000  | 2.808071000  | 29.542620000 |
| N  | 5.880666000  | 1.251827000  | 29.125260000 |
| C  | 6.717365000  | 3.447902000  | 28.964760000 |
| C  | 5.608171000  | 2.566011000  | 28.737351000 |
| C  | 4.406423000  | 3.039085000  | 28.178311000 |
| H  | 3.577870000  | 2.338701000  | 28.001844000 |
| C  | 4.283998000  | 4.394459000  | 27.831477000 |
| H  | 3.345395000  | 4.765723000  | 27.393094000 |
| C  | 5.371004000  | 5.263431000  | 28.030050000 |
| H  | 5.289422000  | 6.322066000  | 27.739841000 |
| C  | 6.577448000  | 4.802760000  | 28.583999000 |
| H  | 7.410450000  | 5.499875000  | 28.714326000 |
| C  | 9.242695000  | 5.222189000  | 30.183948000 |
| C  | 10.053952000 | 5.485125000  | 29.058505000 |
| H  | 10.514744000 | 4.646879000  | 28.515439000 |
| C  | 10.264078000 | 6.804651000  | 28.632721000 |
| H  | 10.887521000 | 7.001097000  | 27.746901000 |
| C  | 9.681607000  | 7.874479000  | 29.335550000 |
| H  | 9.847087000  | 8.909876000  | 29.000044000 |
| C  | 8.893350000  | 7.618869000  | 30.469752000 |
| H  | 8.440529000  | 8.452849000  | 31.027224000 |
| C  | 8.672060000  | 6.298199000  | 30.893252000 |
| H  | 8.038792000  | 6.101651000  | 31.770339000 |
| C  | 8.076584000  | 3.601503000  | 32.253120000 |
| C  | 8.811483000  | 3.917020000  | 33.413776000 |
| H  | 9.903061000  | 4.044604000  | 33.346978000 |
| C  | 8.149236000  | 4.065884000  | 34.643449000 |
| H  | 8.725412000  | 4.310755000  | 35.549113000 |
| C  | 6.754883000  | 3.904606000  | 34.716738000 |
| H  | 6.236167000  | 4.029862000  | 35.680141000 |
| C  | 6.024304000  | 3.581029000  | 33.559650000 |
| H  | 4.933526000  | 3.445151000  | 33.609286000 |
| C  | 6.681503000  | 3.420923000  | 32.330628000 |
| H  | 6.115177000  | 3.146496000  | 31.429468000 |
| C  | 3.801179000  | -0.511135000 | 28.238639000 |
| C  | 2.634735000  | -1.274625000 | 28.451214000 |
| H  | 2.302106000  | -1.503685000 | 29.475570000 |
| C  | 1.895705000  | -1.737585000 | 27.351800000 |
| H  | 0.980488000  | -2.325945000 | 27.517539000 |
| C  | 2.321784000  | -1.448264000 | 26.043575000 |
| H  | 1.738171000  | -1.810289000 | 25.183725000 |
| C  | 3.491749000  | -0.698285000 | 25.832777000 |
| H  | 3.826638000  | -0.472350000 | 24.809095000 |
| C  | 4.235061000  | -0.230322000 | 26.926883000 |
| H  | 5.151656000  | 0.360735000  | 26.778063000 |
| C  | 3.731476000  | 0.673151000  | 30.923685000 |
| C  | 2.504307000  | 1.299566000  | 30.618335000 |
| H  | 2.148424000  | 1.337488000  | 29.578423000 |
| C  | 1.731520000  | 1.863618000  | 31.644736000 |
| H  | 0.775999000  | 2.351820000  | 31.401817000 |

|   |              |              |              |
|---|--------------|--------------|--------------|
| C | 2.175106000  | 1.802218000  | 32.976912000 |
| H | 1.563227000  | 2.239842000  | 33.780197000 |
| C | 3.398277000  | 1.180711000  | 33.283561000 |
| H | 3.748053000  | 1.128627000  | 34.325663000 |
| C | 4.180378000  | 0.623376000  | 32.261202000 |
| H | 5.145463000  | 0.151960000  | 32.496733000 |
| B | 10.706515000 | 2.645131000  | 30.704094000 |
| H | 10.648119000 | 1.510967000  | 31.169688000 |
| H | 11.327909000 | 3.422258000  | 31.432931000 |
| H | 11.113642000 | 2.674782000  | 29.543925000 |
| B | 6.209579000  | -1.199318000 | 30.193547000 |
| H | 6.891033000  | -1.286210000 | 29.157109000 |
| H | 5.852587000  | -2.290263000 | 30.594694000 |
| H | 6.820178000  | -0.548379000 | 31.061527000 |
| O | 9.251918000  | -0.758114000 | 30.207329000 |
| C | 9.885440000  | -0.761793000 | 31.267161000 |
| H | 9.562559000  | -0.084800000 | 32.095678000 |
| C | 11.061264000 | -1.649090000 | 31.496215000 |
| H | 11.941258000 | -1.005572000 | 31.711493000 |
| H | 10.893501000 | -2.264471000 | 32.405949000 |
| H | 11.262343000 | -2.291447000 | 30.619457000 |
| O | 8.758476000  | 0.759841000  | 28.052532000 |
| C | 9.393254000  | 1.616003000  | 27.152084000 |
| H | 10.498624000 | 1.491489000  | 27.199453000 |
| H | 9.059270000  | 1.398770000  | 26.111626000 |
| H | 9.148435000  | 2.676258000  | 27.392722000 |

### (S15) References:

- (a) A. Altomare, G. Cascarano, C. Giacovazzo and A. Guagliardi, *J. Appl. Cryst.*, 1993, **26**, 343–350. (b) M. C. Burla, R. Caliendo, M. Camalli, B. Carrozzini, G. L. Cascarano, L. De. Caro, C. Giacovazzo, G. Polidori and R. Spagna, *J. Appl. Cryst.*, 2005, **38**, 381–388.
- G. M. Sheldrick, *Acta Cryst.*, 2008, **A64**, 112–122.
- (a) C. J. Barger, A. Motta, V. L. Weidner, T. L. Lohr and T. J. Marks, *ACS Catal.* 2019, **9** (10), 9015–9024. (b) S. R. Tamang, A. Singh, D. Bedi, A. R. Bazkiaei, A. A. Warner, K. Glogau, C. McDonald, D. K. Unruh and M. Findlater, *Nat Catal.* 2020, **3**, 154–162. (c) S. Patnaik and A. D. Sadow, *Angew. Chem. Int. Ed.* 2019, **58**, 2505–2509. (d) M. K. Bisai, K. Gour, T. Das, K. Vanka and S. S. Sen, *J. Organomet. Chem.* 2021, **949**, 121924.
- F. Neese, *WIREs Comput. Mol. Sci.* 2012, **2**, 73–78.
- J. P. Perdew, *Phys. Rev. B* 1986, **33**, 8822–8824.
- A. D. Becke, *Phys. Rev. A* 1988, **38**, 3098–3100.
- F. Weigend and R. Ahlrichs, *Phys. Chem. Chem. Phys.* 2005, **7**, 3297–3305.
- R. A. Kendall and H. A. Früchtl, *Theor. Chem. Acc.* 1997, **97**, 158–163.
- K. Eichkorn, O. Treutler, H. Öhm, M. Häser and R. Ahlrichs, *Chem. Phys. Lett.* 1995, **240**, 283–290.
- K. Eichkorn, F. Weigend, O. Treutler and R. Ahlrichs, *Theor. Chem. Acc.* 1997, **97**, 119–124.
- S. Grimme, S. Ehrlich and L. Goerigk, *J. Comput. Chem.*, 2011, **32**, 1456–1465.
